# Supplementary material for: Minor, Nonterpenoid Volatile Compounds Drive the Aroma Differences of Exotic Cannabis
Source: PubMed Central journal article supplement — ACS Omega. 2023 Oct 12;8(42):39203–16. doi: 10.1021/acsomega.3c04496 (PMC10601067; doi:10.1021/acsomega.3c04496), 2023-10-12
Supplement: ao3c04496_si_001.pdf [file ao3c04496_si_001.pdf]

## *Supporting Information*

### **Minor, Non-Terpenoid Volatile Compounds Drive the Aroma Differences of Exotic *Cannabis***

Iain W. H. Oswald<sup>1\*</sup>, Twinkle R. Paryani<sup>1</sup>, Manuel E. Sosa<sup>1,2</sup>, Marcos A. Ojeda<sup>1</sup>, Mark R. Altenbernd<sup>1</sup>, Jonathan J. Grandy<sup>3</sup>, Nathan S. Shafer<sup>4</sup>, Kim Ngo<sup>1</sup>, Jack R. Peat, III<sup>1</sup>, Bradley G. Melshenker<sup>5</sup>, Ian Skelly<sup>5</sup>, Kevin A. Koby<sup>1</sup>, Michael F. Z. Page<sup>2</sup>, Thomas J. Martin<sup>1\*</sup>

<sup>1</sup> *Abstrax Tech, 2661 Dow Avenue, Tustin, CA 92618*

<sup>2</sup> *Cal Poly Pomona, Chemistry and Biochemistry Department, 3801 West Temple Ave Pomona, CA 91768*

<sup>3</sup> *Sepsolve Analytical Schauenburg Analytics, Waterloo, Ontario, N2J4G8*

<sup>4</sup> *Markes International -Schauenburg Analytics, 2355 Gold Meadow Drive, Gold River, CA 95670*

<sup>5</sup> *710 Labs, 8149 Santa Monica Blvd, Suite 298, Los Angeles, CA 90046*

\*correspondence to: [iain.oswald@abstraxtech.com](mailto:iain.oswald@abstraxtech.com), [tj@abstraxtech.com](mailto:tj@abstraxtech.com)

**Table S1.** Calibration curve data of analytes used to quantify aroma compounds in samples.

| Compound name          | <sup>1</sup> t <sub>R</sub> | <sup>2</sup> t <sub>R</sub> | slope    | intercept | R <sup>2</sup> | LOD*<br>(µg/mL) | LOQ*<br>(µg/mL) |
|------------------------|-----------------------------|-----------------------------|----------|-----------|----------------|-----------------|-----------------|
| Isobutyl n-butyrate    | 7.36                        | 3.409                       | 104843.3 | -21892.8  | 0.9992         | 0.0116          | 0.0353          |
| Isopropyl isobutyrate  | 8.55                        | 3.602                       | 94355.96 | 645183.8  | 0.9996         | 0.1803          | 0.5463          |
| Ethyl n-butyrate       | 8.6                         | 3.682                       | 98561.92 | 12737.43  | 0.9990         | 0.0458          | 0.1387          |
| Hexanal                | 8.9                         | 4.067                       | 116431.3 | -72409.3  | 0.9996         | 0.0097          | 0.0294          |
| Prenylthiol            | 9.4                         | 4.11                        | 30133.63 | -7477.28  | 0.9993         | 0.0339          | 0.1026          |
| Ethyl 2-methylbutyrate | 10.4                        | 3.868                       | 68955.37 | -4962.76  | 0.9989         | 0.0407          | 0.1232          |
| Methyl senecioate      | 10.612                      | 4.603                       | 109911.6 | -108898   | 0.9979         | 0.0047          | 0.0143          |
| Ethyl isovalerate      | 10.75                       | 3.772                       | 136376   | -72457.6  | 0.9988         | 0.0142          | 0.0431          |
| 2-Heptanone            | 12.55                       | 4.404                       | 136393.7 | -161264   | 0.9963         | 0.0021          | 0.0063          |
| n-Propyl n-butyrate    | 12.675                      | 3.715                       | 148470.2 | -51831.5  | 0.9994         | 0.0069          | 0.0208          |
| Isobutyl isobutyrate   | 13.45                       | 3.326                       | 184242.7 | -15825    | 0.9996         | 0.0093          | 0.0281          |
| Methyl hexanoate       | 14                          | 3.949                       | 50196.87 | -33436.4  | 0.9980         | 0.0137          | 0.0415          |
| Ethyl senecioate       | 14.136                      | 4.417                       | 69009.72 | -32693.6  | 0.9982         | 0.0082          | 0.0249          |
| α-Pinene               | 14.3                        | 3.368                       | 155145.7 | 53187.64  | 0.9997         | 0.0098          | 0.0298          |
| Camphene               | 15.1                        | 3.476                       | 183041.7 | 26154.73  | 0.9990         | 0.0113          | 0.0342          |
| Ethyl isobutyrate      | 15.4                        | 3.602                       | 77149.87 | -6612.37  | 0.9980         | 0.0659          | 0.1997          |
| Isopropyl senecioate   | 15.84                       | 4.024                       | 202562.4 | -298181   | 0.9970         | 0.0021          | 0.0065          |
| Sabinene               | 16.2                        | 3.549                       | 154734.7 | -18785.4  | 0.9999         | 0.0326          | 0.0986          |
| β-Pinene               | 16.567                      | 3.352                       | 193682.3 | 92735.92  | 0.9995         | 0.0165          | 0.0500          |
| β-Myrcene              | 17.044                      | 3.435                       | 161938.9 | -61971.4  | 0.9999         | 0.007           | 0.0211          |
| Sulcatone              | 17.16                       | 4.941                       | 255317.9 | -173685   | 0.9956         | 0.0017          | 0.0053          |
| Ethyl hexanoate        | 17.667                      | 3.88                        | 138166.3 | -168236   | 0.9954         | 0.0022          | 0.0067          |
| n-Octanal              | 18.017                      | 4.564                       | 69162.42 | -55293.9  | 0.9994         | 0.0165          | 0.0500          |
| 3-Carene               | 18.1                        | 3.325                       | 148849.7 | -4798.95  | 0.9993         | 0.0109          | 0.0331          |
| n-Hexyl acetate        | 18.313                      | 4.01                        | 86359.44 | -100823   | 0.9986         | 0.0079          | 0.0239          |
| α-Terpinene            | 18.52                       | 3.369                       | 174888.7 | -28847.7  | 0.9999         | 0.0093          | 0.0282          |
| n-Propyl senecioate    | 18.9                        | 4.259                       | 206547.8 | -411672   | 0.9897         | 0.0068          | 0.0206          |
| p-Cymene               | 18.975                      | 3.799                       | 219554.5 | -31212.5  | 0.9995         | 0.0054          | 0.0165          |
| D-Limonene             | 19.271                      | 3.406                       | 200640.9 | -38806.3  | 0.9998         | 0.0072          | 0.0219          |
| trans-β-Ocimene        | 19.9                        | 3.52                        | 105861.6 | -24901    | 0.9997         | 0.0077          | 0.0233          |
| Melonal                | 20.433                      | 4.289                       | 273418.5 | -69506.5  | 0.9994         | 0.0058          | 0.0177          |
| γ-Terpinene            | 20.65                       | 3.486                       | 188307.3 | -1861.87  | 0.9999         | 0.0037          | 0.0113          |
| trans-Sabinene hydrate | 21.356                      | 4.987                       | 152614.1 | -34807.7  | 0.9999         | 0.004           | 0.0121          |
| 1-Octanol              | 21.55                       | 0.667                       | 154888.7 | -249689   | 0.9965         | 0.0031          | 0.0095          |
| Terpinolene            | 22                          | 3.428                       | 168142.1 | 15111.61  | 0.9997         | 0.0033          | 0.0099          |
| n-Propyl hexanoate     | 22.25                       | 3.578                       | 82633.57 | -46907.6  | 0.9986         | 0.0042          | 0.0127          |
| Linalool               | 22.646                      | 5.34                        | 146094.5 | -83241.3  | 0.9999         | 0.0039          | 0.0119          |
| Nonanal                | 22.95                       | 3.816                       | 86767.59 | -93041.5  | 0.9954         | 0.0118          | 0.0358          |
| n-Heptyl acetate       | 23.05                       | 3.534                       | 110676.3 | -23921.2  | 0.9986         | 0.0156          | 0.0472          |
| n-Butyl senecioate     | 23.533                      | 3.774                       | 213179.1 | -430589   | 0.9869         | 0.0026          | 0.0078          |
| Methyl octanoate       | 23.56                       | 3.456                       | 110129.9 | 5982.239  | 0.9979         | 0.0059          | 0.0178          |
| endo-Fenchol           | 23.625                      | 5.139                       | 162685.9 | 23694.49  | 0.9997         | 0.0044          | 0.0135          |

|                            |        |       |          |          |        |        |        |
|----------------------------|--------|-------|----------|----------|--------|--------|--------|
| 3-mercaptohexanol          | 24.2   | 4.053 | 63567.39 | -136215  | 0.9949 | 0.0088 | 0.0266 |
| n-Hexyl isobutyrate        | 24.35  | 3.11  | 89162.5  | -59901.3 | 0.9959 | 0.03   | 0.0908 |
| Isobutyl hexanoate         | 24.56  | 3.285 | 181094.8 | 105988.1 | 0.9977 | 0.0033 | 0.0100 |
| Isopulegol                 | 24.758 | 4.512 | 150051.1 | -162444  | 0.9993 | 0.0034 | 0.0103 |
| cis-3-Hexenyl n-butyrate   | 25.667 | 3.381 | 109224.4 | -47179.6 | 0.9986 | 0.0088 | 0.0268 |
| endo-Borneol               | 25.7   | 5.278 | 182279   | -26768.9 | 0.9999 | 0.0012 | 0.0037 |
| Isoamyl senecioate         | 25.8   | 3.529 | 264590.5 | -376932  | 0.9947 | 0.0052 | 0.0158 |
| n-Hexyl n-butyrate         | 26     | 3.175 | 226713   | -85640.3 | 0.9994 | 0.0126 | 0.0383 |
| Cherry propanol            | 26.336 | 1.203 | 160735.2 | -91441.7 | 0.9986 | 0.0047 | 0.0142 |
| $\alpha$ -Terpineol        | 26.463 | 5.034 | 207902.6 | -43400.1 | 0.9999 | 0.0017 | 0.0051 |
| n-Octyl acetate            | 26.633 | 3.341 | 129286.2 | -34566.5 | 0.9997 | 0.0033 | 0.0100 |
| Citronellol                | 27.243 | 4.987 | 253917.3 | -158442  | 0.9961 | 0.0039 | 0.0117 |
| Hexyl 2-methylbutyrate     | 27.35  | 3.116 | 157438.2 | -29225.6 | 0.9994 | 0.01   | 0.0304 |
| $\alpha$ -Citral           | 27.767 | 4.103 | 48631.74 | -31298.2 | 0.9999 | 0.0195 | 0.0590 |
| (+)-Pulegone               | 27.85  | 3.829 | 170940.9 | -126487  | 0.9997 | 0.0076 | 0.0231 |
| Isoamyl hexanoate          | 27.88  | 3.059 | 141237.9 | 64502.48 | 0.9992 | 0.0066 | 0.0199 |
| Geraniol                   | 27.985 | 5.469 | 173983.4 | -189535  | 0.9991 | 0.0043 | 0.0129 |
| 3-mercaptohexyl acetate    | 28.033 | 4.297 | 131254.4 | -107211  | 0.9940 | 0.0116 | 0.0350 |
| 1-Decanol                  | 28.55  | 4.321 | 308496.8 | -200553  | 0.9961 | 0.0024 | 0.0072 |
| n-Heptyl n-butyrate        | 28.967 | 3.018 | 158113.7 | -42012.5 | 0.9995 | 0.0057 | 0.0172 |
| n-hexyl senecioate         | 29.7   | 3.068 | 225563.3 | -321843  | 0.9883 | 0.0052 | 0.0157 |
| Indole                     | 29.814 | 4.272 | 80542.46 | -134212  | 0.9962 | 0.0074 | 0.0225 |
| Citronellol acetate        | 30.3   | 3.093 | 170720.1 | -11643.9 | 0.9979 | 0.0066 | 0.0199 |
| Phenylethyl propionate     | 30.586 | 4.006 | 157760.6 | -76222.9 | 0.9995 | 0.0076 | 0.0232 |
| Methyl anthranilate        | 30.744 | 1.601 | 45264.29 | -32786   | 0.9964 | 0.012  | 0.0364 |
| n-Hexyl hexanoate          | 31     | 2.813 | 283314.2 | -3193.27 | 0.9997 | 0.0133 | 0.0402 |
| Phenylethyl isobutyrate    | 31.54  | 3.698 | 174042.4 | 2821.69  | 0.9994 | 0.0033 | 0.0099 |
| n-Decyl acetate            | 31.6   | 2.988 | 175028.2 | -35228.2 | 0.9994 | 0.0106 | 0.0320 |
| Skatole                    | 31.982 | 0.702 | 169433.9 | -109860  | 0.9974 | 0.0015 | 0.0045 |
| Methyl N-methylantranilate | 32.129 | 5.005 | 136819.2 | -42788   | 0.9990 | 0.0028 | 0.0084 |
| Caryophyllene              | 32.175 | 2.951 | 255406.7 | -6229.36 | 0.9997 | 0.0116 | 0.0353 |
| 3-mercaptohexyl butyrate   | 32.2   | 3.624 | 156754.5 | -94576   | 0.9967 | 0.0087 | 0.0264 |
| Ethyl anthranilate         | 32.308 | 1.195 | 214174.9 | -180086  | 0.9962 | 0.0018 | 0.0055 |
| Phenylethyl n-butyrate     | 32.5   | 4.027 | 172406   | -50376.5 | 0.9998 | 0.0042 | 0.0129 |
| Humulene                   | 32.933 | 3.016 | 212837.4 | -3795.57 | 0.9997 | 0.0147 | 0.0445 |
| 6-amyl- $\alpha$ -pyrone   | 33.15  | 5.61  | 276587.9 | -175985  | 0.9972 | 0.0022 | 0.0065 |
| cis-Nerolidol              | 34.34  | 4.035 | 182571.4 | -32215   | 0.9998 | 0.0035 | 0.0105 |
| trans-Nerolidol            | 35.1   | 3.884 | 207804.5 | -110737  | 0.9998 | 0.0074 | 0.0224 |
| (-)-Guaïol                 | 36.35  | 4.333 | 255159   | -15171.8 | .9999  | 0.0259 | 0.0784 |
| $\alpha$ -Bisabolol        | 38.8   | 4.903 | 255480.8 | -39859   | 0.9997 | 0.0023 | 0.007  |

\*LOD and LOQ are defined by the equations:  $LOD = \frac{3.3 \cdot \sigma}{S}$ ;  $LOQ = \frac{10 \cdot \sigma}{S}$  where  $\sigma$  is the standard deviation of the region in the chromatogram for each analyte from seven hexane blanks and  $S$  is the slope of the curve.

**Table S2.** Summary of Sensory Panel Exotic Score data.

| Variety name         | Panelist 1 | Panelist 2 | Panelist 3 | Panelist 4 | Panelist 5 | Panelist 6 | Panelist 7 | exotic score |
|----------------------|------------|------------|------------|------------|------------|------------|------------|--------------|
| Grape Pie x Do-Si-Do | 98         | 90         | 80         | 95         | 70         | 80         | 99         | 87.4(11)     |
| Juice Man            | 89         | 95         | 70         | 95         | 85         | 80         | 96         | 87.1(9.6)    |
| Papaya Peach         | 94         | 95         | 80         | 100        | 50         | 90         | 95         | 86.3(17.2)   |
| Cake Crasher         | 77         | 70         | 90         | 85         | 95         | 70         | 99         | 83.7(11.7)   |
| Starburst 36 #1      | 60         | 85         | 85         | 90         | 80         | 80         | 92         | 81.7(10.6)   |
| Upsidedown frown #5  | 85         | 85         | 80         | 75         | 70         | 75         | 95         | 80.7(8.4)    |
| Motor Nana           | 91         | 85         | 50         | 80         | 75         | 85         | 96         | 80.3(15)     |
| Garlic Cocktail #7   | 70         | 75         | 75         | 75         | 90         | 80         | 96         | 80.1(9.4)    |
| Zkittlez 710         | 83         | 65         | 80         | 80         | 86         | 75         | 92         | 80.1(8.6)    |
| Banana Scream        | 90         | 90         | 75         | 75         | 50         | 85         | 93         | 79.7(15)     |
| Bubblegum Zkittlez   | 91         | 70         | 85         | 95         | 30         | 85         | 83         | 77(22.1)     |
| TK x Butterscotch    | 88         | 80         | 90         | 70         | 50         | 60         | 96         | 76.3(16.9)   |
| Purple Churro        | 96         | 80         | 60         | 70         | 40         | 80         | 94         | 74.3(19.7)   |
| Pure Guava           | 68         | 75         | 70         | 95         | 90         | 60         | 60         | 74(13.8)     |
| Rainbow 2.0          | 92         | 70         | 40         | 70         | 40         | 90         | 99         | 71.6(24.2)   |
| Fruity Pebbles       | 65         | 80         | 80         | 50         | 90         | 35         | 100        | 71.4(22.9)   |
| OPP x Smarties       | 89         | 60         | 50         | 75         | 70         | 80         | 72         | 70.9(12.8)   |
| Gorilla Glue         | 75         | 60         | 75         | 40         | 75         | 60         | 71         | 65.1(13)     |
| Bubba Kush           | 43         | 60         | 70         | 75         | 80         | 30         | 77         | 62.1(19)     |
| Bacio Gelato         | 42         | 40         | 25         | 50         | 55         | 50         | 40         | 43.1(9.9)    |
| MAC 1                | 15         | 10         | 45         | 30         | 65         | 65         | 45         | 39.3(22.1)   |
| Gelato 33            | 37         | 25         | 15         | 45         | 25         | 40         | 55         | 34.6(13.7)   |
| Kimbo Kush           | 15         | 35         | 55         | 45         | 40         | 30         | 18         | 34(14.3)     |
| Lucky Charms         | 15         | 15         | 30         | 65         | 50         | 35         | 5          | 30.7(21.3)   |
| Pie Hoe              | 22         | 15         | 35         | 20         | 30         | 35         | 20         | 25.3(8)      |
| Cookies and Cream    | 1          | 20         | 35         | 0          | 25         | 25         | 2          | 15.4(14.2)   |
| GMO Cookies          | 3          | 10         | 0          | 10         | 0          | 5          | 12         | 5.7(5)       |
| OG                   | 10         | 0          | 5          | 5          | 1          | 0          | 0          | 3(3.8)       |
| 710 chem             | 0          | 2          | 5          | 0          | 1          | 0          | 5          | 1.9(2.3)     |
| GMO                  | 0          | 10         | 0          | 0          | 0          | 0          | 2          | 1.7(3.7)     |

**Table S3.** Sensory Descriptors obtained from sensory panel for all samples.

| Descriptor | Classification |
|------------|----------------|
| fuel       | Prototypical   |
| gas        | Prototypical   |
| burnt      | Prototypical   |
| lemon      | Prototypical   |
| lime       | Prototypical   |
| earth      | Prototypical   |
| musky      | Prototypical   |
| wood       | Prototypical   |
| bright     | Prototypical   |
| ethereal   | Prototypical   |
| citrus     | Prototypical   |
| camphoric  | Prototypical   |
| mentholic  | Prototypical   |
| floral     | Prototypical   |
| grass      | Prototypical   |
| green      | Prototypical   |
| herbal     | Prototypical   |
| pine       | Prototypical   |
| plant      | Prototypical   |
| vegetables | Prototypical   |
| pungent    | Prototypical   |
| sulfuric   | Prototypical   |
| anisic     | Prototypical   |
| pepper     | Prototypical   |
| rosemary   | Prototypical   |
| spicy      | Prototypical   |
| bitter     | Prototypical   |
| fatty      | Prototypical   |
| fresh      | Prototypical   |
| sharp      | Prototypical   |
| sour       | Prototypical   |
| terpenic   | Prototypical   |



|              |               |
|--------------|---------------|
| waxy         | Prototypical  |
| banana       | sweet exotic  |
| berry        | sweet exotic  |
| blueberry    | sweet exotic  |
| grape        | sweet exotic  |
| grapefruit   | sweet exotic  |
| guava        | sweet exotic  |
| jam          | sweet exotic  |
| lychee       | sweet exotic  |
| mango        | sweet exotic  |
| papaya       | sweet exotic  |
| peach        | sweet exotic  |
| pineapple    | sweet exotic  |
| raspberry    | sweet exotic  |
| red fruit    | sweet exotic  |
| ripe         | sweet exotic  |
| stone fruit  | sweet exotic  |
| strawberry   | sweet exotic  |
| tangerine    | sweet exotic  |
| tropical     | sweet exotic  |
| yellow fruit | sweet exotic  |
| cherry       | sweet exotic  |
| coconut      | sweet exotic  |
| dark berry   | sweet exotic  |
| fruit        | sweet exotic  |
| melon        | sweet exotic  |
| sweet        | sweet exotic  |
| tart         | sweet exotic  |
| bready       | sweet exotic  |
| cereal       | sweet exotic  |
| butterscotch | sweet exotic  |
| honey        | sweet exotic  |
| bubblegum    | sweet exotic  |
| candy        | sweet exotic  |
| chocolate    | sweet exotic  |
| cream        | sweet exotic  |
| alliaceous   | savory exotic |
| astringent   | savory exotic |
| cheese       | savory exotic |
| chemical     | savory exotic |
| moth balls   | savory exotic |
| savory       | savory exotic |

**Table S4.** Sensory intensity descriptors.

| <b>Intensity descriptor</b> | <b>Multiplier</b> |
|-----------------------------|-------------------|
| negligible                  | 0.5               |
| somewhat                    | 0.75              |
| more                        | 1.25              |
| Strong                      | 1.5               |
| overwhelmingly              | 2                 |

Table S5. Tabulated sensory panel results (1/5).

| Variety              | fuel | gas  | lemon | lime | earth | musky | wood | bright | ethereal | citrus | camphoric | mentholic | floral | grass | green |
|----------------------|------|------|-------|------|-------|-------|------|--------|----------|--------|-----------|-----------|--------|-------|-------|
| grape pie x do-si-do | 0    | 3    | 0     | 0    | 3     | 0     | 2    | 0      | 0        | 0      | 0         | 0         | 0      | 0     | 0     |
| juice man            | 0    | 2    | 0     | 0    | 1.5   | 0     | 2    | 0      | 0        | 2      | 0         | 2         | 3      | 0     | 0     |
| papaya peach         | 0    | 1    | 1     | 0    | 0     | 0     | 1    | 1      | 0        | 3      | 0         | 0         | 1      | 0     | 0     |
| cake crasher         | 0    | 1    | 0     | 0    | 0     | 1     | 0    | 0      | 0        | 1      | 0         | 0         | 0      | 0     | 0     |
| starburst 36 #1      | 0    | 1    | 0     | 0    | 0     | 2     | 0    | 0      | 0        | 3      | 0         | 0         | 0      | 0     | 0     |
| upsidedown frown #5  | 0    | 0    | 0     | 0    | 1     | 1     | 0    | 0      | 0        | 4      | 0         | 0         | 0      | 0     | 1     |
| motor nana           | 0    | 6    | 0     | 0    | 3.5   | 0     | 1    | 0      | 0        | 2      | 0         | 0         | 1      | 0     | 0.75  |
| garlic cocktail #7   | 0    | 1    | 0     | 2    | 1     | 1     | 0    | 0      | 0        | 6.75   | 0         | 0         | 0      | 0     | 0     |
| zkittlez 710         | 0    | 4.5  | 1     | 1    | 0     | 0     | 0    | 0      | 0        | 2      | 0         | 0         | 1      | 0     | 0     |
| banana scream        | 0    | 2    | 0     | 0    | 3     | 0     | 4    | 0      | 1        | 3      | 0         | 1         | 0      | 0     | 1     |
| bubblegum zkittlez   | 0    | 2    | 0     | 0    | 0     | 0     | 0    | 0      | 0        | 3      | 0.75      | 0         | 4      | 0     | 1     |
| tk x butterscotch    | 0    | 1    | 0     | 0    | 1     | 1     | 0    | 0      | 0        | 0      | 0         | 0         | 1      | 2     | 1     |
| purple churro        | 1    | 6    | 0     | 0    | 7     | 1     | 3    | 0      | 0        | 1      | 0         | 0         | 2      | 0     | 0     |
| pure guava           | 0    | 0    | 0     | 0    | 0     | 0     | 1    | 1      | 0        | 3.5    | 0         | 0         | 0      | 0     | 0.75  |
| rainbow 2.0          | 0    | 5    | 1     | 1    | 1.5   | 0     | 1    | 0      | 0        | 0      | 0         | 0         | 2      | 0     | 0     |
| fruity pebbles       | 0    | 0    | 0     | 0    | 1     | 1     | 0    | 0      | 0        | 0      | 0         | 0         | 0      | 0     | 0     |
| opp x smarties       | 0    | 3    | 0     | 0    | 1     | 0     | 1    | 0      | 0        | 3      | 0         | 1         | 0      | 0     | 1     |
| gorilla glue         | 0    | 2    | 2     | 1    | 1     | 0     | 0    | 0      | 0        | 5.75   | 0         | 0         | 0      | 0     | 0     |
| bubba kush           | 0    | 0.75 | 0     | 0    | 0     | 1     | 0    | 0      | 0        | 0      | 0         | 0         | 0      | 0     | 0     |
| trainwreck           | 0    | 0    | 6     | 1    | 0     | 0     | 4    | 1      | 0        | 4      | 1         | 0         | 1      | 0     | 1     |
| bacio gelato         | 0    | 10   | 0     | 0    | 3.5   | 2     | 1    | 1      | 1        | 1      | 5         | 0         | 1      | 0     | 0     |
| mac 1                | 0    | 2    | 0     | 0    | 0     | 1     | 0    | 0      | 1        | 2      | 1         | 0         | 0      | 0     | 0     |
| gelato 33            | 2    | 5    | 1     | 1    | 1     | 0     | 0    | 1      | 0        | 3.75   | 3         | 1         | 0      | 0     | 0     |
| kimbo kush           | 0    | 5    | 0     | 0    | 0     | 2     | 1    | 0      | 0        | 0.75   | 0         | 0         | 0      | 1     | 0     |
| lucky charms         | 0    | 0    | 0     | 0    | 2     | 0     | 0    | 0      | 0        | 2      | 2         | 0         | 0      | 1     | 0     |
| pie hoe              | 0    | 2.75 | 0     | 0    | 2.5   | 1     | 1    | 0      | 0        | 1      | 0         | 0         | 0      | 3     | 2     |
| cookies and cream    | 0    | 0    | 0     | 0    | 0     | 0     | 0.75 | 0      | 0        | 1.75   | 1         | 0         | 1.5    | 1     | 2     |
| gmo cookies          | 0    | 4    | 0     | 0    | 1     | 0     | 0    | 0      | 0        | 0      | 3         | 1         | 0      | 0     | 0     |
| og                   | 0    | 3    | 3     | 0    | 4     | 2     | 0    | 0      | 0        | 2      | 1         | 1         | 0      | 0     | 0     |
| 710 chem             | 0    | 9.5  | 0     | 0    | 4.5   | 0     | 2    | 0      | 0        | 2      | 0         | 0         | 0      | 0     | 0     |
| gmo                  | 0    | 2.5  | 0     | 0    | 1     | 1     | 0    | 0      | 0        | 0      | 0         | 0         | 0      | 0     | 0     |

Table S6. Tabulated sensory panel results (2/5).

| Variety              | herbal | pine | plant | vegetables | sulfuric | pepper | rosemary | spicy | bitter | fatty | fresh | sharp | sour |
|----------------------|--------|------|-------|------------|----------|--------|----------|-------|--------|-------|-------|-------|------|
| grape pie x do-si-do | 0      | 0    | 0     | 0          | 1        | 0      | 0        | 0     | 0      | 0     | 0     | 0     | 0    |
| juice man            | 1      | 0    | 0     | 0          | 0        | 0      | 0        | 0.75  | 0      | 1     | 0     | 0     | 0    |
| papaya peach         | 0      | 1    | 0     | 0          | 0        | 0      | 0        | 1     | 0      | 1     | 0     | 0     | 1    |
| cake crasher         | 1      | 0    | 0     | 0          | 0        | 0      | 0        | 0     | 0      | 0     | 0     | 0     | 0    |
| starburst 36 #1      | 0      | 1    | 0     | 0          | 0        | 0      | 0        | 0.75  | 0      | 0     | 0     | 0     | 0    |
| upsidedown #5        | 0      | 1    | 0     | 0          | 0        | 0      | 0        | 0     | 0      | 0     | 0     | 0     | 0    |
| motor nana           | 1      | 0    | 0     | 0          | 0        | 0      | 0        | 1     | 0      | 0     | 0     | 0     | 0    |
| garlic cocktail #7   | 0      | 0    | 0     | 0          | 1        | 0      | 0        | 1     | 0      | 2     | 0     | 0     | 0    |
| zkittlez 710         | 0      | 0    | 0     | 0          | 0        | 0      | 0        | 0     | 0      | 0     | 0     | 0     | 0    |
| banana scream        | 1      | 1    | 0     | 0          | 0        | 0      | 0        | 1     | 0      | 0     | 0     | 0     | 0    |
| bubblegum zkittlez   | 0      | 0    | 0     | 0          | 0        | 0      | 0        | 0     | 0      | 0     | 0     | 0     | 0    |
| tk x butterscotch    | 2      | 0    | 0     | 0          | 0        | 0      | 0        | 0     | 0      | 0     | 0     | 0     | 0    |
| purple churro        | 2      | 0    | 0     | 0.75       | 1        | 0      | 0        | 0     | 0      | 0     | 0     | 0     | 0    |
| pure guava           | 2      | 0    | 0     | 0.75       | 0        | 0      | 1        | 0.75  | 0      | 0     | 0     | 0     | 0    |
| rainbow 2.0          | 1      | 0    | 0     | 0          | 0        | 0      | 0        | 0     | 0      | 0     | 0     | 0     | 0    |
| fruity pebbles       | 0      | 0    | 0     | 0          | 0        | 0      | 0        | 1     | 0      | 0     | 0     | 1     | 0    |
| opp x smarties       | 2      | 0    | 1     | 1          | 0        | 0      | 0        | 0     | 0      | 0     | 0     | 0     | 0    |
| gorilla glue         | 0      | 0    | 1     | 0          | 0        | 2      | 0        | 1     | 0      | 1     | 0     | 0     | 0    |
| bubba kush           | 2      | 1    | 0     | 0          | 0        | 0      | 0        | 0     | 0      | 0     | 0     | 0     | 0    |
| trainwreck           | 0      | 4    | 0     | 0          | 0        | 0      | 1        | 3     | 0      | 0     | 0     | 1     | 3    |
| bacio gelato         | 0      | 0    | 0     | 0          | 0        | 0      | 0        | 1     | 0      | 0     | 0     | 2     | 0    |
| mac 1                | 0      | 0    | 0     | 0          | 0        | 1      | 0        | 1     | 0      | 0     | 0     | 0     | 0    |
| gelato 33            | 1      | 1    | 0     | 0          | 0        | 0      | 0        | 0     | 0      | 0     | 0     | 0     | 0    |
| kimbo kush           | 0      | 0    | 0     | 0          | 0        | 0.75   | 0        | 0     | 0      | 1     | 0     | 0     | 0    |
| lucky charms         | 1      | 0    | 1.75  | 0          | 0        | 0      | 0        | 0     | 0      | 0     | 0     | 1     | 0    |
| pie hoe              | 2      | 0    | 0     | 1          | 0        | 0      | 0        | 0     | 0      | 0     | 0     | 0     | 0    |
| cookies and cream    | 3      | 0    | 2     | 0          | 0.75     | 0      | 0        | 0     | 0      | 0     | 1     | 0     | 0    |
| gmo cookies          | 0      | 2    | 0     | 0          | 0        | 0      | 0        | 0     | 0      | 0     | 0     | 0     | 0    |
| og                   | 4      | 1    | 0     | 0          | 1        | 0      | 0        | 0     | 0      | 0     | 0     | 0     | 0    |
| 710 chem             | 1      | 0    | 0     | 0          | 0        | 0      | 0        | 2     | 1      | 0     | 0     | 0     | 0    |
| gmo                  | 1      | 0    | 0     | 0          | 0        | 0      | 0        | 0     | 0      | 0     | 0     | 0     | 0    |

Table S7. Tabulated sensory panel results (3/5).

| Variety              | terpenic | waxy | banana | berry | blueberry | grape | grape fruit | guava | lychee | papaya | peach | pineapple | red fruit |
|----------------------|----------|------|--------|-------|-----------|-------|-------------|-------|--------|--------|-------|-----------|-----------|
| grape pie x do-si-do | 0        | 0    | 0      | 4     | 0         | 5     | 0           | 0     | 0      | 0      | 1     | 0         | 0         |
| juice man            | 0        | 0    | 0      | 0     | 0         | 0     | 0           | 0     | 0      | 1      | 0     | 0         | 0         |
| papaya peach         | 0        | 0    | 0      | 1     | 0         | 0     | 0           | 0     | 1      | 1      | 5     | 0         | 1         |
| cake crusher         | 0        | 0    | 0      | 2     | 0         | 1     | 0           | 0     | 0      | 0      | 0     | 0         | 0         |
| starburst 36 #1      | 0        | 0    | 0      | 1     | 0         | 1     | 0           | 1     | 0      | 1      | 0     | 1         | 0         |
| upside down frown #5 | 0        | 0    | 0      | 3     | 1         | 0     | 0           | 1     | 0      | 0      | 0     | 1         | 0         |
| motor nana           | 0        | 0    | 3.75   | 2     | 0         | 0     | 0           | 0     | 0      | 0      | 0     | 0         | 0         |
| garlic cocktail #7   | 0        | 1    | 0      | 0     | 0         | 1     | 1           | 0     | 0      | 0      | 0     | 0         | 0         |
| zkittlez 710         | 0        | 0    | 0      | 1     | 0         | 0     | 0           | 0     | 0      | 0      | 0     | 0         | 0         |
| banana scream        | 0        | 0    | 3      | 0     | 0         | 0     | 0           | 0     | 0      | 0      | 0     | 0         | 0         |
| bubblegum zkittlez   | 0        | 0    | 0      | 2     | 0         | 0     | 0           | 0     | 0      | 0      | 0     | 0         | 0         |
| tk x butterscotch    | 0        | 0    | 0      | 0     | 0         | 0.5   | 0           | 0     | 0      | 0      | 0     | 0         | 0         |
| purple churro        | 0        | 0    | 0      | 3     | 0         | 1     | 0           | 0     | 0      | 0      | 0     | 0         | 0         |
| pure guava           | 0        | 0    | 0      | 0     | 0         | 1     | 1           | 0     | 0      | 0      | 0     | 0         | 0         |
| rainbow 2.0          | 0        | 0    | 1      | 2     | 0         | 0     | 0           | 0     | 0      | 0      | 0     | 0         | 0         |
| fruity pebbles       | 0        | 0    | 0      | 1     | 0         | 0     | 0           | 0     | 0      | 0      | 0     | 0         | 0         |
| opp x smarties       | 0        | 0    | 0      | 0     | 0         | 1     | 0           | 0     | 0      | 0      | 0     | 0         | 0         |
| gorilla glue         | 1        | 1    | 0      | 0     | 0         | 0     | 0           | 0     | 0      | 0      | 0     | 0         | 0         |
| bubba kush           | 0        | 0    | 0      | 1.75  | 0         | 0     | 0           | 0     | 0      | 0      | 0     | 1         | 0         |
| trainwreck           | 2        | 0    | 0      | 0     | 0         | 0     | 0           | 0     | 0      | 0      | 0     | 0         | 0         |
| bacio gelato         | 0        | 0    | 0      | 4     | 1         | 0     | 0           | 0     | 0      | 0      | 0     | 0         | 0         |
| mac 1                | 0        | 0    | 0      | 1.5   | 0         | 0     | 0           | 0     | 0      | 0      | 0     | 0         | 0         |
| gelato 33            | 0        | 1    | 0      | 2     | 0         | 0     | 0           | 0     | 0      | 0      | 2     | 0         | 0         |
| kimbo kush           | 0        | 0    | 0      | 1     | 0         | 1     | 0           | 0     | 0      | 0      | 0     | 0         | 0         |
| lucky charms         | 2        | 0    | 0      | 2     | 0         | 0     | 0           | 0     | 0      | 0      | 0     | 0         | 0         |
| pie hoe              | 1        | 0    | 0      | 0     | 0         | 0     | 0           | 0     | 0      | 0      | 0     | 0         | 0         |
| cookies and cream    | 0        | 0    | 0      | 0     | 0         | 0     | 0           | 0     | 0      | 0      | 0     | 0         | 0         |
| gmo cookies          | 1        | 0    | 0      | 1     | 0         | 0     | 0           | 0     | 0      | 0      | 0     | 0         | 0         |
| og                   | 0        | 0    | 0      | 0     | 0         | 0     | 0           | 0     | 0      | 0      | 0     | 0         | 0         |
| 710 chem             | 0        | 0    | 0      | 0     | 0         | 0     | 0           | 0     | 0      | 0      | 0     | 0         | 0         |
| gmo                  | 0        | 0    | 0      | 0     | 0         | 0     | 0           | 0     | 0      | 0      | 0     | 0         | 0         |

**Table S8.** Tabulated sensory panel results (4/5).

| Variety              | ripe | strawberry | tangerine | tropical | cherry | coconut | dark berry | fruit | melon | sweet | tart | bready | cereal |
|----------------------|------|------------|-----------|----------|--------|---------|------------|-------|-------|-------|------|--------|--------|
| grape pie x do-si-do | 0    | 1          | 0         | 0        | 0      | 1       | 0          | 1     | 0     | 3     | 0    | 0      | 1      |
| juice man            | 1    | 0          | 1         | 3        | 0      | 0       | 0          | 4.5   | 0     | 4     | 0    | 0      | 0      |
| papaya peach         | 1    | 0          | 0         | 2        | 0      | 1       | 0          | 2.5   | 0     | 4     | 0    | 0      | 0      |
| cake crasher         | 0    | 0          | 0         | 2        | 0      | 1       | 0          | 5     | 0     | 6     | 0    | 0      | 0      |
| starburst 36 #1      | 0    | 0          | 1.75      | 2        | 0      | 0       | 0          | 2.5   | 0     | 1     | 0    | 0      | 0      |
| upsidedown frown #5  | 0    | 1          | 0.75      | 2        | 0      | 0       | 0          | 0     | 0     | 5.5   | 0    | 0      | 0      |
| motor nana           | 1    | 0          | 0         | 2        | 0      | 0       | 0          | 2     | 0     | 3     | 0    | 0      | 0      |
| garlic cocktail #7   | 0    | 0          | 4.5       | 1        | 0      | 0       | 0          | 1     | 0     | 3     | 0    | 0      | 0      |
| zkittlez 710         | 0    | 1          | 0         | 1        | 0      | 0       | 0          | 5.5   | 0     | 4     | 0    | 0      | 0      |
| banana scream        | 1    | 0          | 2         | 2        | 0      | 0       | 0          | 3     | 0     | 3     | 0    | 0      | 0      |
| bubblegum zkittlez   | 0    | 0          | 0         | 1        | 1      | 0       | 0          | 1     | 0.75  | 4.75  | 0    | 0      | 0      |
| tk x butterscotch    | 0    | 0          | 0         | 0        | 0      | 0       | 0          | 0     | 0     | 6.75  | 0    | 0      | 0      |
| purple churro        | 0    | 0          | 0         | 1        | 0      | 0       | 1          | 1     | 0     | 4     | 0    | 0      | 0      |
| pure guava           | 0    | 0          | 1         | 2        | 0      | 0       | 0          | 2     | 0     | 2     | 0    | 0      | 0      |
| rainbow 2.0          | 1    | 0          | 1         | 0        | 0      | 1       | 0          | 2     | 0     | 7     | 0    | 0      | 0      |
| fruity pebbles       | 0    | 0          | 0         | 1        | 0      | 0       | 0          | 0     | 0     | 5     | 0    | 0      | 1      |
| opp x smarties       | 0    | 0          | 0         | 0        | 0      | 0       | 0          | 2     | 0     | 2.75  | 0    | 0      | 0      |
| gorilla glue         | 0    | 0          | 3.5       | 0        | 0      | 0       | 0          | 2     | 0     | 2     | 0    | 0      | 0      |
| bubba kush           | 0    | 0          | 0         | 0        | 0      | 0       | 0          | 0     | 0     | 5.75  | 0    | 0      | 0      |
| trainwreck           | 0    | 0          | 0         | 2        | 0      | 0       | 0          | 0     | 0     | 1     | 0    | 0      | 0      |
| bacio gelato         | 0    | 0          | 0         | 0        | 1      | 0       | 0          | 1     | 0     | 4     | 1    | 0      | 0      |
| mac 1                | 0    | 0          | 1.75      | 1        | 0      | 0       | 0          | 1     | 0     | 2.5   | 0    | 0      | 0      |
| gelato 33            | 0    | 0          | 1.5       | 1        | 0      | 0       | 0          | 3     | 0     | 4     | 0    | 0      | 0      |
| kimbo kush           | 1    | 0          | 0         | 3        | 0      | 0       | 1          | 3     | 0     | 1.75  | 0    | 0      | 0      |
| lucky charms         | 0    | 0          | 1         | 1        | 0      | 0       | 0          | 0     | 0     | 1.75  | 0    | 0      | 0      |
| pie hoe              | 0    | 0          | 0         | 0        | 0      | 0       | 0          | 0.75  | 0     | 3.5   | 0    | 0      | 0      |
| cookies and cream    | 0    | 0          | 0         | 0        | 0      | 0       | 0          | 0.5   | 0     | 2.75  | 0    | 0      | 0      |
| gmo cookies          | 0    | 0          | 0         | 0        | 0      | 0       | 0          | 0     | 0     | 0     | 0    | 0      | 0      |
| og                   | 0    | 0          | 0         | 0        | 0      | 0       | 0          | 0     | 0     | 0.75  | 0    | 1      | 0      |
| 710 chem             | 0    | 0          | 0         | 0        | 0      | 0       | 0          | 0.75  | 0     | 0     | 0    | 0      | 0      |
| gmo                  | 0    | 0          | 0         | 0        | 0      | 0       | 0          | 0     | 0     | 1     | 0    | 0      | 0      |

Table S9. Tabulated sensory panel results (5/5).

| Variety              | butterscotch | bubblegum | candy | chocolate | cream | alliaceous | astringent | chemical | moth balls | savory |
|----------------------|--------------|-----------|-------|-----------|-------|------------|------------|----------|------------|--------|
| grape pie x do-si-do | 0            | 0         | 0     | 0         | 1     | 0          | 0          | 0        | 0          | 0      |
| juice man            | 0            | 0         | 0     | 0         | 0     | 0          | 0          | 0        | 0          | 0      |
| papaya peach         | 0            | 0         | 1     | 0         | 2     | 0          | 0          | 0        | 0          | 0      |
| cake crusher         | 0            | 0         | 1     | 0         | 2     | 0          | 0          | 0        | 0          | 0      |
| starburst 36 #1      | 1            | 0         | 0     | 0         | 0.75  | 0          | 0          | 0        | 0          | 0      |
| upsidedown frown #5  | 0            | 0         | 0     | 0         | 1     | 0          | 0          | 0        | 0          | 0      |
| motor nana           | 0            | 0         | 2     | 0         | 0     | 0          | 0          | 0        | 0          | 0      |
| garlic cocktail #7   | 0            | 0         | 0     | 0         | 0     | 0          | 0          | 0        | 0          | 1      |
| zkittlez 710         | 0            | 0         | 1     | 0         | 1     | 0          | 0          | 0        | 0          | 0      |
| banana scream        | 0            | 0         | 0     | 1         | 3     | 0          | 0          | 0        | 0          | 0      |
| bubblegum zkittlez   | 0            | 1         | 2     | 0         | 0     | 0          | 0          | 0        | 0          | 0      |
| tk x butterscotch    | 2            | 0         | 1     | 0         | 2     | 0          | 0          | 0        | 0          | 1      |
| purple churro        | 0            | 0         | 0     | 0         | 1     | 0          | 0          | 0        | 0          | 0      |
| pure guava           | 0            | 0         | 0     | 0         | 0     | 0          | 0          | 0        | 0          | 0      |
| rainbow 2.0          | 0            | 0         | 1     | 1         | 3     | 0          | 0          | 0        | 0          | 0      |
| fruity pebbles       | 0            | 0         | 2     | 0         | 0     | 1          | 0          | 1.5      | 0          | 1      |
| opp x smarties       | 0            | 0         | 0     | 0         | 0     | 0          | 0          | 0        | 0          | 0      |
| gorilla glue         | 0            | 0         | 0     | 0         | 0     | 0          | 0          | 0        | 0          | 0      |
| bubba kush           | 0            | 0         | 2     | 0         | 0.75  | 0          | 0          | 0        | 0          | 0      |
| trainwreck           | 0            | 0         | 0     | 0         | 0     | 0          | 0          | 0        | 0          | 0      |
| bacio gelato         | 2            | 0         | 0     | 0         | 2     | 0          | 0          | 2        | 0          | 0      |
| mac 1                | 0            | 0         | 0     | 0         | 0     | 0          | 0          | 1        | 0          | 0      |
| gelato 33            | 0            | 0         | 0     | 0         | 0     | 0          | 0          | 2        | 0          | 0      |
| kimbo kush           | 1            | 0         | 0     | 0         | 0     | 0          | 0          | 0        | 0          | 0      |
| lucky charms         | 0            | 0         | 0     | 0         | 0     | 0          | 0          | 0        | 0          | 0      |
| pie hoe              | 0            | 0         | 0     | 0         | 0     | 0          | 0          | 0        | 0          | 0      |
| cookies and cream    | 0            | 0         | 0     | 0         | 0     | 0          | 0          | 0        | 0          | 0      |
| gmo cookies          | 0            | 0         | 0     | 0         | 0     | 2          | 0          | 1.75     | 0          | 4      |
| og                   | 0            | 0         | 0     | 0         | 1     | 0          | 0          | 0        | 0          | 0      |
| 710 chem             | 0            | 0         | 0     | 0         | 0     | 0          | 1          | 3        | 0          | 0      |
| gmo                  | 0            | 0         | 0     | 0         | 0     | 5          | 0          | 3        | 1          | 4      |

Table S10. Analyte concentrations (µg/mg) (1/5).

| Compound name     | type      | subtype         | Grape Pie x Do-Si-Do | Juice Man | Papaya Peach | Cake Crusher | Starburst 36 #1 | Upsidedown frown #5 |
|-------------------|-----------|-----------------|----------------------|-----------|--------------|--------------|-----------------|---------------------|
| Exotic score      | NA        | NA              | 87.4                 | 87.1      | 86.3         | 83.7         | 81.7            | 80.7                |
| d-limonene        | terpene   | monoterpene     | 27.4856              | 27.3671   | 25.394       | 31.1784      | 13.4118         | 9.314               |
| caryophyllene     | terpene   | sesquiterpene   | 14.4908              | 7.2246    | 9.1608       | 28.4825      | 12.4374         | 7.3378              |
| α-pinene          | terpene   | monoterpene     | 3.3254               | 3.2823    | 3.1695       | 5.7667       | 0.972           | 0.4858              |
| trans-β-ocimene   | terpene   | monoterpene     | 0.1933               | 0.1885    | 0.2244       | 7.469        | 0.1357          | 0.1226              |
| humulene          | terpene   | sesquiterpene   | 5.0325               | 3.28      | 3.2626       | 6.0714       | 6.3386          | 2.7254              |
| β-myrcene         | terpene   | monoterpene     | 8.4562               | 11.5103   | 26.9216      | 2.7682       | 8.3258          | 5.7506              |
| linalool          | terpene   | monoterpenoid   | 8.071                | 10.7348   | 10.6784      | 10.3456      | 12.1843         | 13.2357             |
| endo-fenchol      | terpene   | monoterpenoid   | 2.6743               | 3.5406    | 2.7459       | 2.1907       | 1.7568          | 2.087               |
| α-terpineol       | terpene   | monoterpenoid   | 1.7571               | 2.2204    | 1.6647       | 1.8809       | 1.598           | 1.8398              |
| β-pinene          | terpene   | monoterpene     | 1.1978               | 0.7743    | 1.0717       | 6.0899       | 1.9764          | 1.0672              |
| (-)-guaiol        | terpene   | sesquiterpenoid | 2.2616               | 3.0298    | 2.9779       | 2.5023       | 4.4824          | 0.0164              |
| camphene          | terpene   | monoterpene     | 0.9                  | 0.9077    | 0.8632       | 0.792        | 0.3164          | 0.1916              |
| endo-borneol      | terpene   | monoterpenoid   | 0.7082               | 1.0366    | 0.8795       | 0.473        | 0.4902          | 0.4583              |
| α-bisabolol       | terpene   | sesquiterpenoid | 2.41                 | 1.7787    | 2.2111       | 1.0052       | 2.3823          | 1.3026              |
| terpinolene       | terpene   | monoterpene     | 0.4237               | 0.419     | 0.3954       | 0.4109       | 0.1938          | 0.1716              |
| n-hexyl hexanoate | flavorant | ester           | 0.1249               | 0.3954    | 0.238        | 0.2203       | 0.1352          | 0.1231              |
| trans-nerolidol   | terpene   | sesquiterpenoid | 0.0767               | 0.7445    | 0.5893       | 0.0386       | 1.1993          | 0.7392              |

|                            |           |                 |        |        |        |        |        |        |
|----------------------------|-----------|-----------------|--------|--------|--------|--------|--------|--------|
| ethyl hexanoate            | flavorant | ester           | 0.1837 | 0.0405 | 0      | 1.6701 | 0.1899 | 0.0938 |
| γ-terpinene                | terpene   | monoterpene     | 0.1033 | 0.1318 | 0.1512 | 0.1133 | 0.0551 | 0.0548 |
| n-hexyl acetate            | flavorant | ester           | 0.0246 | 0.033  | 0.0261 | 0      | 0.041  | 0      |
| isopulegol                 | terpene   | monoterpenoid   | 0.085  | 0.0504 | 0.0489 | 0.3113 | 0.1937 | 0.1616 |
| α-terpinene                | terpene   | monoterpene     | 0.0832 | 0.0884 | 0.1159 | 0.044  | 0.0521 | 0.0521 |
| n-propyl hexanoate         | flavorant | ester           | 0.0347 | 0.0424 | 0.0286 | 0.0961 | 0.0405 | 0.0214 |
| 1-octanol                  | flavorant | alcohol         | 0.0361 | 0.0592 | 0.0353 | 0.1534 | 0.4848 | 0.0407 |
| geraniol                   | terpene   | monoterpenoid   | 0.1047 | 0.1157 | 0.0453 | 0.1315 | 0.1622 | 0.0743 |
| ethyl senecioate           | flavorant | ester           | 0.1687 | 0.1576 | 0.1243 | 0.1039 | 0.4156 | 0.0102 |
| n-butyl senecioate         | flavorant | ester           | 0      | 0      | 0      | 0.0449 | 0.0404 | 0      |
| indole                     | flavorant | heterocycle     | 0.0333 | 0.0341 | 0.038  | 0.0373 | 0      | 0.048  |
| n-propyl senecioate        | flavorant | ester           | 0      | 0.0398 | 0.0386 | 0.0396 | 0.0474 | 0      |
| trans-sabinene hydrate     | terpene   | monoterpenoid   | 0.0187 | 0.0119 | 0.0146 | 0.0863 | 0.0464 | 0.0411 |
| 2-heptanone                | flavorant | ketone          | 0.0268 | 0.0306 | 0.0311 | 0.1086 | 0.0762 | 0.0474 |
| α-citral                   | terpene   | monoterpenoid   | 0      | 0      | 0.0232 | 0.0235 | 0.0169 | 0.0202 |
| isoamyl senecioate         | flavorant | ester           | 0.0286 | 0      | 0.0392 | 0      | 0.03   | 0      |
| nonanal                    | flavorant | aldehyde        | 0.0268 | 0.0238 | 0.023  | 0.0236 | 0.0233 | 0      |
| isoamyl hexanoate          | flavorant | ester           | 0.0187 | 0.1084 | 0.016  | 0.0113 | 0.0366 | 0.0431 |
| prenylthiol                | flavorant | vsc             | 0.0779 | 0.0582 | 0.0364 | 0.3614 | 0.0107 | 0.3156 |
| 3-carene                   | terpene   | monoterpene     | 0.0256 | 0.0361 | 0.0609 | 0.0139 | 0.0246 | 0.0265 |
| methyl anthranilate        | flavorant | ester           | 0.0188 | 0.0279 | 0.0369 | 0.0277 | 0.0205 | 0.0213 |
| n-octyl acetate            | flavorant | ester           | 0.007  | 0.0316 | 0.0261 | 0.0278 | 0.0377 | 0.0187 |
| n-octanal                  | flavorant | aldehyde        | 0      | 0      | 0      | 0      | 0      | 0      |
| n-hexyl n-butyrate         | flavorant | ester           | 0.0125 | 0.5765 | 0.9892 | 0.0255 | 0.0184 | 0.0096 |
| ethyl anthranilate         | flavorant | ester           | 0      | 0      | 0.0191 | 0      | 0      | 0.018  |
| citronellol                | terpene   | monoterpenoid   | 0.0376 | 0.04   | 0.0153 | 0.0408 | 0.0308 | 0.0286 |
| 3-mercaptohexyl acetate    | flavorant | vsc             | 0      | 0      | 0.0203 | 0      | 0.038  | 0.0172 |
| cherry propanol            | flavorant | alcohol         | 0.0131 | 0.0178 | 0.0141 | 0.0138 | 0.0146 | 0.0129 |
| 1-decanol                  | flavorant | alcohol         | 0.0128 | 0.017  | 0.0134 | 0.024  | 0.1183 | 0      |
| sulcatone                  | flavorant | ketone          | 0.0136 | 0.0146 | 0.0132 | 0      | 0.015  | 0      |
| sabinene                   | terpene   | monoterpene     | 0.0106 | 0.0098 | 0.0123 | 0.0177 | 0.0129 | 0.0143 |
| methyl hexanoate           | flavorant | ester           | 0      | 0.0142 | 0.0145 | 0.0263 | 0.0369 | 0.0215 |
| ethyl isovalerate          | flavorant | ester           | 0.0158 | 0.012  | 0.0111 | 0.0181 | 0.0179 | 0      |
| methyl octanoate           | flavorant | ester           | 0      | 0      | 0      | 0      | 0      | 0.0652 |
| ethyl 2-methylbutyrate     | flavorant | ester           | 0.0056 | 0.0037 | 0.0027 | 0.024  | 0.0101 | 0.0024 |
| n-propyl n-butyrate        | flavorant | ester           | 0      | 0      | 0      | 0.0084 | 0      | 0      |
| n-heptyl acetate           | flavorant | ester           | 0      | 0      | 0      | 0.0056 | 0.0057 | 0.0047 |
| ethyl isobutyrate          | flavorant | ester           | 0.007  | 0.0087 | 0.0024 | 0      | 0.0174 | 0.0057 |
| p-cymene                   | terpene   | monoterpene     | 0.0073 | 0.006  | 0.0061 | 0.006  | 0.0068 | 0.0063 |
| cis-nerolidol              | terpene   | sesquiterpenoid | 0      | 0.0039 | 0      | 0.0081 | 0.0086 | 0.0046 |
| hexyl 2-methylbutyrate     | flavorant | ester           | 0      | 0.0111 | 0.0184 | 0.0049 | 0.0049 | 0      |
| ethyl n-butyrate           | flavorant | ester           | 0.0011 | 0      | 0      | 0      | 0      | 0      |
| isobutyl hexanoate         | flavorant | ester           | 0      | 0.0031 | 0      | 0      | 0.0087 | 0      |
| cis-3-hexenyl n-butyrate   | flavorant | ester           | 0      | 0.0341 | 0.0091 | 0      | 0      | 0      |
| n-hexyl isobutyrate        | flavorant | ester           | 0      | 0.0294 | 0.0474 | 0      | 0.0906 | 0.014  |
| n-heptyl n-butyrate        | flavorant | ester           | 0.0083 | 0.0104 | 0.0306 | 0      | 0      | 0.0139 |
| methyl n-methylantranilate | flavorant | ester           | 0      | 0.0086 | 0.0108 | 0      | 0      | 0      |
| phenylethyl n-butyrate     | flavorant | ester           | 0      | 0.0075 | 0.0505 | 0      | 0      | 0      |
| isobutyl n-butyrate        | flavorant | ester           | 0      | 0.0071 | 0.0058 | 0      | 0.0054 | 0      |
| citronellol acetate        | flavorant | ester           | 0.004  | 0.0067 | 0.002  | 0.0027 | 0.0021 | 0.0042 |
| phenylethyl isobutyrate    | flavorant | ester           | 0      | 0.0006 | 0.0045 | 0      | 0.0013 | 0      |
| isopropyl isobutyrate      | flavorant | ester           | 0      | 0      | 0      | 0      | 0      | 0      |
| n-hexyl senecioate         | flavorant | ester           | 0.027  | 0      | 0      | 0      | 0.0309 | 0.0631 |
| isopropyl senecioate       | flavorant | ester           | 0.0319 | 0      | 0.0299 | 0.035  | 0.0458 | 0      |
| hexanal                    | flavorant | aldehyde        | 0      | 0      | 0      | 0.0176 | 0.0148 | 0.0156 |
| phenylethyl propionate     | flavorant | ester           | 0      | 0      | 0.0107 | 0      | 0      | 0      |
| isobutyl isobutyrate       | flavorant | ester           | 0      | 0      | 0      | 0      | 0      | 0      |
| melonal                    | flavorant | aldehyde        | 0      | 0      | 0      | 0      | 0      | 0.0055 |
| 3-mercaptohexanol          | flavorant | vsc             | 0      | 0      | 0      | 0      | 0.0748 | 0      |
| 6-amil-α-pyrone            | flavorant | lactone         | 0      | 0      | 0      | 0.0038 | 0.0063 | 0.0038 |
| 3-mercaptohexyl butyrate   | flavorant | vsc             | 0      | 0      | 0      | 0      | 0      | 0.0158 |
| methyl senecioate          | flavorant | ester           | 0      | 0      | 0      | 0      | 0      | 0      |

|                 |           |             |   |   |   |   |   |   |
|-----------------|-----------|-------------|---|---|---|---|---|---|
| skatole         | flavorant | heterocycle | 0 | 0 | 0 | 0 | 0 | 0 |
| n-decyl acetate | flavorant | ester       | 0 | 0 | 0 | 0 | 0 | 0 |

**Table S11.** Analyte concentrations ( $\mu\text{g}/\text{mg}$ ) (2/5).

| Compound name            | type      | subtype         | Motor Nana  | Garlic Cocktail #7 | Zkittlez 710 | Banana Scream | Bubblegum Zkittlez | TK x Butterscotch |
|--------------------------|-----------|-----------------|-------------|--------------------|--------------|---------------|--------------------|-------------------|
| <b>Exotic score</b>      | <b>NA</b> | <b>NA</b>       | <b>80.3</b> | <b>80.1</b>        | <b>80.1</b>  | <b>79.7</b>   | <b>77</b>          | <b>76.3</b>       |
| d-limonene               | terpene   | monoterpene     | 30.1899     | 20.6988            | 22.9777      | 33.8001       | 8.6232             | 31.8435           |
| caryophyllene            | terpene   | sesquiterpene   | 12.559      | 17.0237            | 49.8183      | 14.7668       | 8.9827             | 16.9542           |
| $\alpha$ -pinene         | terpene   | monoterpene     | 4.1389      | 8.3863             | 2.3211       | 8.5825        | 9.1326             | 3.2845            |
| trans- $\beta$ -ocimene  | terpene   | monoterpene     | 3.0344      | 2.7158             | 0.1538       | 6.338         | 0.9326             | 0.2379            |
| humulene                 | terpene   | sesquiterpene   | 4.8495      | 6.333              | 19.5995      | 5.7279        | 3.4366             | 7.1073            |
| $\beta$ -myrcene         | terpene   | monoterpene     | 10.039      | 13.8353            | 1.6187       | 4.6416        | 32.6996            | 13.9165           |
| linalool                 | terpene   | monoterpenoid   | 2.5033      | 3.6134             | 23.7398      | 3.8049        | 2.9639             | 8.5705            |
| endo-fenchol             | terpene   | monoterpenoid   | 3.3026      | 1.5068             | 2.4911       | 3.6034        | 1.4796             | 2.9572            |
| $\alpha$ -terpineol      | terpene   | monoterpenoid   | 2.0005      | 1.3968             | 1.8638       | 2.1845        | 0.9133             | 1.7879            |
| $\beta$ -pinene          | terpene   | monoterpene     | 1.6709      | 5.5737             | 4.4285       | 2.0087        | 1.5536             | 2.1156            |
| (-)-guaiol               | terpene   | sesquiterpenoid | 3.056       | 0.0065             | 0.061        | 1.6661        | 0.0523             | 0.3958            |
| camphene                 | terpene   | monoterpene     | 1.0281      | 0.5598             | 0.707        | 1.246         | 0.7128             | 0.8798            |
| endo-borneol             | terpene   | monoterpenoid   | 0.9106      | 0.4445             | 0.5514       | 1.1941        | 0.7032             | 0.7826            |
| $\alpha$ -bisabolol      | terpene   | sesquiterpenoid | 1.3724      | 0.9904             | 2.6348       | 1.0114        | 1.1927             | 1.5535            |
| terpinolene              | terpene   | monoterpene     | 0.4412      | 0.3011             | 0.3112       | 0.4972        | 0.1799             | 0.4574            |
| n-hexyl hexanoate        | flavorant | ester           | 0.5816      | 1.2356             | 0.9347       | 0.3317        | 0.493              | 1.0694            |
| trans-nerolidol          | terpene   | sesquiterpenoid | 0.4332      | 0.4918             | 2.4942       | 0.2549        | 0.7181             | 1.2905            |
| ethyl hexanoate          | flavorant | ester           | 0.2415      | 0                  | 0.0315       | 0.219         | 0                  | 0                 |
| $\gamma$ -terpinene      | terpene   | monoterpene     | 0.1361      | 0.0919             | 0.0614       | 0.1783        | 0.1106             | 0.1358            |
| n-hexyl acetate          | flavorant | ester           | 0.2117      | 0.59               | 0.1014       | 0.1367        | 0.0508             | 0.0266            |
| isopulegol               | terpene   | monoterpenoid   | 0.0901      | 0.2046             | 0.2986       | 0.1138        | 0.0604             | 0.1358            |
| $\alpha$ -terpinene      | terpene   | monoterpene     | 0.0948      | 0.0734             | 0.0409       | 0.1083        | 0.1437             | 0.0857            |
| n-propyl hexanoate       | flavorant | ester           | 0.0701      | 0.0289             | 0.0251       | 0.0676        | 0.0214             | 0.0357            |
| 1-octanol                | flavorant | alcohol         | 0.0778      | 0.7446             | 1.8385       | 0.0503        | 0.1198             | 0.0392            |
| geraniol                 | terpene   | monoterpenoid   | 0.0276      | 0.035              | 1.0345       | 0.042         | 0.0318             | 0.0726            |
| ethyl senecioate         | flavorant | ester           | 0.2353      | 0.0118             | 0.015        | 0.0408        | 0.0117             | 0.0396            |
| n-butyl senecioate       | flavorant | ester           | 0           | 0.0466             | 0.04         | 0.0393        | 0                  | 0                 |
| indole                   | flavorant | heterocycle     | 0.0324      | 0.334              | 0.0439       | 0.0393        | 0.0592             | 0.0504            |
| n-propyl senecioate      | flavorant | ester           | 0.05        | 0                  | 0            | 0.0392        | 0                  | 0                 |
| trans-sabinene hydrate   | terpene   | monoterpenoid   | 0.0197      | 0.0703             | 0.0579       | 0.0382        | 0.016              | 0.0275            |
| 2-heptanone              | flavorant | ketone          | 0.0334      | 0.3413             | 0.0359       | 0.0335        | 0.0334             | 0.0285            |
| $\alpha$ -citral         | terpene   | monoterpenoid   | 0           | 0.0173             | 0.02         | 0.0282        | 0.018              | 0                 |
| isoamyl senecioate       | flavorant | ester           | 0.0284      | 0.0313             | 0.0281       | 0.0275        | 0.0283             | 0                 |
| nonanal                  | flavorant | aldehyde        | 0.0234      | 0.0262             | 0.0223       | 0.0258        | 0.0241             | 0                 |
| isoamyl hexanoate        | flavorant | ester           | 0.0447      | 0.0098             | 0.0123       | 0.0252        | 0.0094             | 0.0793            |
| prenylthiol              | flavorant | vsc             | 0.0772      | 0.029              | 0.0932       | 0.0241        | 0.0764             | 0.05              |
| 3-carene                 | terpene   | monoterpene     | 0.0286      | 0.0342             | 0.0159       | 0.0226        | 0.0732             | 0.0395            |
| methyl anthranilate      | flavorant | ester           | 0.0196      | 0.0707             | 0.0189       | 0.019         | 0.0283             | 0                 |
| n-octyl acetate          | flavorant | ester           | 0.0604      | 0.4245             | 0.2983       | 0.019         | 0.0448             | 0.0271            |
| n-octanal                | flavorant | aldehyde        | 0.0212      | 0                  | 0            | 0.0179        | 0                  | 0                 |
| n-hexyl n-butyrate       | flavorant | ester           | 0.0432      | 0.0892             | 0.0971       | 0.0178        | 0.0785             | 1.0008            |
| ethyl anthranilate       | flavorant | ester           | 0           | 0                  | 0            | 0.0174        | 0.0176             | 0                 |
| citronellol              | terpene   | monoterpenoid   | 0.015       | 0.0202             | 0.5933       | 0.0169        | 0.1898             | 0.042             |
| 3-mercaptopentyl acetate | flavorant | vsc             | 0           | 0.0323             | 0            | 0.0161        | 0                  | 0.0173            |
| cherry propanol          | flavorant | alcohol         | 0.013       | 0.0136             | 0.0127       | 0.0152        | 0.0144             | 0.0168            |
| 1-decanol                | flavorant | alcohol         | 0.0178      | 0.1227             | 0.2093       | 0.0144        | 0.0238             | 0.014             |
| sulcatone                | flavorant | ketone          | 0           | 0                  | 0.0137       | 0.0144        | 0                  | 0                 |
| sabinene                 | terpene   | monoterpene     | 0.0112      | 0.0138             | 0.0142       | 0.0143        | 0.0177             | 0.0167            |
| methyl hexanoate         | flavorant | ester           | 0.014       | 0.0179             | 0.0154       | 0.014         | 0.0151             | 0                 |
| ethyl isovalerate        | flavorant | ester           | 0.0154      | 0.0166             | 0            | 0.0134        | 0.0154             | 0                 |
| methyl octanoate         | flavorant | ester           | 0           | 0                  | 0.0016       | 0.013         | 0                  | 0                 |
| ethyl 2-methylbutyrate   | flavorant | ester           | 0.0095      | 0.0107             | 0.0025       | 0.0122        | 0                  | 0                 |
| n-propyl n-butyrate      | flavorant | ester           | 0.0081      | 0                  | 0            | 0.0095        | 0                  | 0                 |
| n-heptyl acetate         | flavorant | ester           | 0.0092      | 0.0139             | 0.0169       | 0.0068        | 0.0057             | 0.0051            |
| ethyl isobutyrate        | flavorant | ester           | 0.01        | 0                  | 0            | 0.0066        | 0.0024             | 0.013             |
| p-cymene                 | terpene   | monoterpene     | 0.0071      | 0                  | 0.0046       | 0.0061        | 0.0141             | 0.0063            |



|                             |           |                 |        |        |        |        |        |        |
|-----------------------------|-----------|-----------------|--------|--------|--------|--------|--------|--------|
| cis-nerolidol               | terpene   | sesquiterpenoid | 0      | 0.0076 | 0.0094 | 0.0045 | 0.0065 | 0.0047 |
| hexyl 2-methylbutyrate      | flavorant | ester           | 0.0084 | 0.0067 | 0.0086 | 0.0042 | 0.0074 | 0.0315 |
| ethyl n-butyrate            | flavorant | ester           | 0.0002 | 0.0105 | 0      | 0.0038 | 0      | 0      |
| isobutyl hexanoate          | flavorant | ester           | 0      | 0      | 0      | 0      | 0      | 0      |
| cis-3-hexenyl n-butyrate    | flavorant | ester           | 0.0089 | 0      | 0      | 0      | 0.0097 | 0.0674 |
| n-hexyl isobutyrate         | flavorant | ester           | 0.0145 | 0.0276 | 0.0236 | 0      | 0.0212 | 0.0415 |
| n-heptyl n-butyrate         | flavorant | ester           | 0.0114 | 0      | 0      | 0      | 0.0058 | 0.0156 |
| methyl n-methylanthranilate | flavorant | ester           | 0      | 0      | 0      | 0      | 0.0074 | 0      |
| phenylethyl n-butyrate      | flavorant | ester           | 0      | 0      | 0      | 0      | 0      | 0      |
| isobutyl n-butyrate         | flavorant | ester           | 0      | 0      | 0      | 0      | 0      | 0      |
| citronellol acetate         | flavorant | ester           | 0.0021 | 0      | 0.0226 | 0      | 0.0349 | 0.009  |
| phenylethyl isobutyrate     | flavorant | ester           | 0      | 0      | 0      | 0      | 0      | 0.0013 |
| isopropyl isobutyrate       | flavorant | ester           | 0      | 0      | 0      | 0      | 0      | 0      |
| n-hexyl senecioate          | flavorant | ester           | 0.0291 | 0      | 0.0297 | 0      | 0.0289 | 0.0389 |
| isopropyl senecioate        | flavorant | ester           | 0.0307 | 0      | 0      | 0      | 0      | 0.0323 |
| hexanal                     | flavorant | aldehyde        | 0      | 0      | 0.0144 | 0      | 0      | 0      |
| phenylethyl propionate      | flavorant | ester           | 0      | 0.0126 | 0.0563 | 0      | 0      | 0      |
| isobutyl isobutyrate        | flavorant | ester           | 0.0018 | 0      | 0      | 0      | 0      | 0      |
| melonal                     | flavorant | aldehyde        | 0      | 0      | 0.005  | 0      | 0      | 0      |
| 3-mercaptohexanol           | flavorant | vsc             | 0      | 0.057  | 0      | 0      | 0      | 0      |
| 6-amil- $\alpha$ -pyrone    | flavorant | lactone         | 0      | 0      | 0.0065 | 0      | 0      | 0      |
| 3-mercaptohexyl butyrate    | flavorant | vsc             | 0      | 0      | 0      | 0      | 0      | 0      |
| methyl senecioate           | flavorant | ester           | 0      | 0      | 0      | 0      | 0      | 0      |
| skatole                     | flavorant | heterocycle     | 0      | 0.0227 | 0      | 0      | 0      | 0      |
| n-decyl acetate             | flavorant | ester           | 0      | 0      | 0      | 0      | 0      | 0      |

**Table S12.** Analyte concentrations ( $\mu\text{g}/\text{mg}$ ) (3/5).

| Compound name           | type      | subtype         | Purple Churro | Pure Guava | Rainbow 2.0 | Fruity Pebbles | OPP x Smarties | Gorilla Glue |
|-------------------------|-----------|-----------------|---------------|------------|-------------|----------------|----------------|--------------|
| <b>Exotic score</b>     | <b>NA</b> | <b>NA</b>       | <b>74.3</b>   | <b>74</b>  | <b>71.6</b> | <b>71.4</b>    | <b>70.9</b>    | <b>65.1</b>  |
| d-limonene              | terpene   | monoterpene     | 28.0271       | 10.5413    | 29.5132     | 13.5712        | 27.8193        | 2.3165       |
| caryophyllene           | terpene   | sesquiterpene   | 16.5482       | 25.7297    | 9.1492      | 20.2296        | 6.9884         | 27.5644      |
| $\alpha$ -pinene        | terpene   | monoterpene     | 5.3067        | 0.7374     | 4.4826      | 0.5774         | 6.7141         | 0.2849       |
| trans- $\beta$ -ocimene | terpene   | monoterpene     | 2.2323        | 0.9149     | 3.222       | 0.047          | 1.5933         | 0.081        |
| humulene                | terpene   | sesquiterpene   | 4.1935        | 10.9186    | 3.052       | 5.7167         | 2.3988         | 9.4912       |
| $\beta$ -myrcene        | terpene   | monoterpene     | 3.3628        | 12.1224    | 8.4449      | 0.9231         | 10.4521        | 2.7247       |
| linalool                | terpene   | monoterpenoid   | 12.4994       | 5.5128     | 9.4179      | 13.1933        | 5.2782         | 7.0479       |
| endo-fenchol            | terpene   | monoterpenoid   | 4.0565        | 1.3085     | 3.2957      | 1.7389         | 3.3224         | 0.5528       |
| $\alpha$ -terpineol     | terpene   | monoterpenoid   | 2.6993        | 0.9476     | 2.1758      | 1.3756         | 2.0837         | 0.4967       |
| $\beta$ -pinene         | terpene   | monoterpene     | 4.4967        | 1.3538     | 2.7691      | 1.4349         | 2.5859         | 0.5975       |
| (-)-guaiaol             | terpene   | sesquiterpenoid | 0.0439        | 0.0183     | 2.3959      | 1.0144         | 0.5916         | 3.2394       |
| camphene                | terpene   | monoterpene     | 1.1106        | 0.22       | 0.9643      | 0.1956         | 1.3501         | 0.0988       |
| endo-borneol            | terpene   | monoterpenoid   | 0.8454        | 0.3738     | 0.9154      | 0.3928         | 1.0352         | 0.1631       |
| $\alpha$ -bisabolol     | terpene   | sesquiterpenoid | 0.7636        | 1.2108     | 0.9282      | 1.6121         | 0.2734         | 2.9936       |
| terpinolene             | terpene   | monoterpene     | 0.3909        | 0.0456     | 0.4184      | 0.2006         | 0.4048         | 0.0397       |
| n-hexyl hexanoate       | flavorant | ester           | 4.5421        | 0.2073     | 2.2578      | 0.2917         | 0.9549         | 0.4845       |
| trans-nerolidol         | terpene   | sesquiterpenoid | 0.7855        | 1.3576     | 0.8958      | 1.0882         | 0.1357         | 0.6998       |
| ethyl hexanoate         | flavorant | ester           | 0.0243        | 0          | 0.0275      | 0.0238         | 0              | 0.0352       |
| $\gamma$ -terpinene     | terpene   | monoterpene     | 0.1245        | 0.0578     | 0.1465      | 0.0427         | 0.1561         | 0.0462       |
| n-hexyl acetate         | flavorant | ester           | 0.0736        | 0.0295     | 0.0786      | 0.0369         | 0              | 0.0541       |
| isopulegol              | terpene   | monoterpenoid   | 0.1738        | 0.1099     | 0.1101      | 0.178          | 0.0645         | 0.066        |
| $\alpha$ -terpinene     | terpene   | monoterpene     | 0.0811        | 0.0582     | 0.0895      | 0.0336         | 0.1133         | 0.0216       |
| n-propyl hexanoate      | flavorant | ester           | 0.0286        | 0.0155     | 0.0311      | 0.021          | 0.0293         | 0.0158       |
| 1-octanol               | flavorant | alcohol         | 0.361         | 0.0333     | 0.1158      | 0.1105         | 0.0389         | 0.1342       |
| geraniol                | terpene   | monoterpenoid   | 0.065         | 0.0847     | 0.089       | 0.3171         | 0.0466         | 0.0382       |
| ethyl senecioate        | flavorant | ester           | 0.0104        | 0.054      | 0.0513      | 0.0641         | 0.0248         | 0.0119       |
| n-butyl senecioate      | flavorant | ester           | 0.0385        | 0.0419     | 0           | 0              | 0              | 0            |
| indole                  | flavorant | heterocycle     | 0.05          | 0.0339     | 0           | 0.0332         | 0.0345         | 0            |
| n-propyl senecioate     | flavorant | ester           | 0             | 0          | 0           | 0.0377         | 0              | 0            |

|                             |           |                 |        |        |        |        |        |        |
|-----------------------------|-----------|-----------------|--------|--------|--------|--------|--------|--------|
| trans-sabinene hydrate      | terpene   | monoterpenoid   | 0.0429 | 0.0511 | 0.0318 | 0.0451 | 0.028  | 0.0182 |
| 2-heptanone                 | flavorant | ketone          | 0.037  | 0.0402 | 0.0549 | 0.044  | 0.0307 | 0.0399 |
| $\alpha$ -citral            | terpene   | monoterpenoid   | 0.0166 | 0.0232 | 0      | 0      | 0.0234 | 0.0195 |
| isoamyl senecioate          | flavorant | ester           | 0.0273 | 0.0337 | 0.0287 | 0.0267 | 0.0279 | 0      |
| nonanal                     | flavorant | aldehyde        | 0.0215 | 0.0215 | 0.0252 | 0      | 0.0288 | 0.0361 |
| isoamyl hexanoate           | flavorant | ester           | 0.1958 | 0      | 0.0884 | 0.009  | 0.1198 | 0.0084 |
| prenylthiol                 | flavorant | vsc             | 0.2307 | 0.1059 | 0.1009 | 0.4876 | 0.066  | 0.0199 |
| 3-carene                    | terpene   | monoterpene     | 0.0222 | 0.0307 | 0.0309 | 0.0117 | 0.0385 | 0.0184 |
| methyl anthranilate         | flavorant | ester           | 0.0218 | 0.0184 | 0.0182 | 0.0189 | 0.0228 | 0.0273 |
| n-octyl acetate             | flavorant | ester           | 0.1597 | 0.0062 | 0.0405 | 0.0314 | 0.0132 | 0.0471 |
| n-octanal                   | flavorant | aldehyde        | 0      | 0      | 0      | 0      | 0      | 0      |
| n-hexyl n-butyrate          | flavorant | ester           | 0.1802 | 0.0091 | 0.1027 | 0.0138 | 0.0369 | 4.2155 |
| ethyl anthranilate          | flavorant | ester           | 0.0168 | 0      | 0      | 0.0164 | 0      | 0      |
| citronellol                 | terpene   | monoterpenoid   | 0.0266 | 0.016  | 0.0464 | 0.0962 | 0.0952 | 0.0167 |
| 3-mercaptohexyl acetate     | flavorant | vsc             | 0.0161 | 0.063  | 0.0169 | 0      | 0      | 0.0172 |
| cherry propanol             | flavorant | alcohol         | 0.0138 | 0.0264 | 0.0143 | 0.0116 | 0.0159 | 0.0124 |
| 1-decanol                   | flavorant | alcohol         | 0.0546 | 0.0154 | 0.0208 | 0.021  | 0.0148 | 0.0619 |
| sulcatone                   | flavorant | ketone          | 0.0159 | 0      | 0.0157 | 0.0142 | 0.0135 | 0.0164 |
| sabinene                    | terpene   | monoterpene     | 0.0172 | 0.0155 | 0.016  | 0.0124 | 0.0072 | 0.0172 |
| methyl hexanoate            | flavorant | ester           | 0.0146 | 0      | 0.0157 | 0.016  | 0.0141 | 0.0182 |
| ethyl isovalerate           | flavorant | ester           | 0      | 0      | 0      | 0.0103 | 0      | 0      |
| methyl octanoate            | flavorant | ester           | 0      | 0      | 0      | 0.0003 | 0      | 0.0006 |
| ethyl 2-methylbutyrate      | flavorant | ester           | 0      | 0      | 0.0032 | 0      | 0      | 0      |
| n-propyl n-butyrate         | flavorant | ester           | 0      | 0      | 0      | 0      | 0      | 0      |
| n-heptyl acetate            | flavorant | ester           | 0.0069 | 0      | 0.0053 | 0.0047 | 0      | 0.0103 |
| ethyl isobutyrate           | flavorant | ester           | 0.0026 | 0      | 0.0071 | 0.0045 | 0.0095 | 0      |
| p-cymene                    | terpene   | monoterpene     | 0.0057 | 0.0273 | 0.0053 | 0.0047 | 0.0073 | 0.0054 |
| cis-nerolidol               | terpene   | sesquiterpenoid | 0.0043 | 0      | 0.004  | 0.0043 | 0.004  | 0.0059 |
| hexyl 2-methylbutyrate      | flavorant | ester           | 0.0051 | 0      | 0.0048 | 0      | 0.0047 | 0.045  |
| ethyl n-butyrate            | flavorant | ester           | 0      | 0      | 0      | 0      | 0      | 0      |
| isobutyl hexanoate          | flavorant | ester           | 0      | 0      | 0      | 0      | 0      | 0      |
| cis-3-hexenyl n-butyrate    | flavorant | ester           | 0.0107 | 0      | 0.0096 | 0      | 0.0147 | 0.0901 |
| n-hexyl isobutyrate         | flavorant | ester           | 0.0196 | 0      | 0.0167 | 0.0133 | 0.0146 | 0.1081 |
| n-heptyl n-butyrate         | flavorant | ester           | 0.0099 | 0      | 0.0088 | 0      | 0.0082 | 0.0903 |
| methyl n-methylanthranilate | flavorant | ester           | 0      | 0      | 0      | 0      | 0      | 0      |
| phenylethyl n-butyrate      | flavorant | ester           | 0      | 0      | 0      | 0      | 0      | 0      |
| isobutyl n-butyrate         | flavorant | ester           | 0      | 0.0058 | 0      | 0      | 0      | 0.0064 |
| citronellol acetate         | flavorant | ester           | 0.0057 | 0.002  | 0.0047 | 0.0106 | 0.0154 | 0      |
| phenylethyl isobutyrate     | flavorant | ester           | 0      | 0      | 0      | 0      | 0      | 0.0005 |
| isopropyl isobutyrate       | flavorant | ester           | 0      | 0      | 0      | 0      | 0      | 0      |
| n-hexyl senecioate          | flavorant | ester           | 0      | 0.0306 | 0.0286 | 0.0276 | 0.0293 | 0.0292 |
| isopropyl senecioate        | flavorant | ester           | 0      | 0.0315 | 0.0301 | 0.0331 | 0.0292 | 0      |
| hexanal                     | flavorant | aldehyde        | 0      | 0.0138 | 0.0131 | 0      | 0      | 0.0143 |
| phenylethyl propionate      | flavorant | ester           | 0      | 0.0101 | 0      | 0      | 0      | 0.0123 |
| isobutyl isobutyrate        | flavorant | ester           | 0      | 0      | 0      | 0      | 0      | 0      |
| melonal                     | flavorant | aldehyde        | 0.0051 | 0      | 0      | 0      | 0      | 0      |
| 3-mercaptohexanol           | flavorant | vsc             | 0      | 0      | 0      | 0      | 0      | 0.0435 |
| 6-amyl- $\alpha$ -pyrone    | flavorant | lactone         | 0      | 0.0050 | 0      | 0.0065 | 0      | 0.0033 |
| 3-mercaptohexyl butyrate    | flavorant | vsc             | 0      | 0      | 0      | 0      | 0      | 0.032  |
| methyl senecioate           | flavorant | ester           | 0      | 0.0334 | 0      | 0      | 0      | 0      |
| skatole                     | flavorant | heterocycle     | 0      | 0      | 0      | 0.0132 | 0      | 0      |
| n-decyl acetate             | flavorant | ester           | 0      | 0      | 0      | 0      | 0      | 0      |

Table S13. Analyte concentrations ( $\mu\text{g}/\text{mg}$ ) (4/5).

| Compound name           | type      | subtype       | Bubba Kush | Trainwreck | Bacio Gelato | MAC 1   | Gelato 33 | Kimbo Kush | Lucky Charms |
|-------------------------|-----------|---------------|------------|------------|--------------|---------|-----------|------------|--------------|
| <b>Exotic score</b>     | <b>NA</b> | <b>NA</b>     | 62.1       | 43.7       | 43.1         | 39.3    | 34.6      | 34         | 30.7         |
| d-limonene              | terpene   | monoterpene   | 19.5705    | 6.9983     | 34.3947      | 11.6332 | 28.9228   | 29.4287    | 26.2159      |
| caryophyllene           | terpene   | sesquiterpene | 14.2841    | 7.4599     | 10.7122      | 11.5929 | 14.0053   | 9.1111     | 20.0846      |
| $\alpha$ -pinene        | terpene   | monoterpene   | 2.6567     | 1.807      | 6.5956       | 2.6069  | 5.2179    | 2.7139     | 1.5105       |
| trans- $\beta$ -ocimene | terpene   | monoterpene   | 0.1919     | 2.7805     | 1.5016       | 0.488   | 0.862     | 0.1711     | 0.0346       |

|                             |           |                 |         |        |        |        |        |        |         |
|-----------------------------|-----------|-----------------|---------|--------|--------|--------|--------|--------|---------|
| humulene                    | terpene   | sesquiterpene   | 4.7684  | 1.9742 | 1.6138 | 3.6209 | 2.6116 | 2.4851 | 7.7092  |
| β-myrcene                   | terpene   | monoterpene     | 16.1311 | 3.7173 | 2.0578 | 1.4605 | 4.4012 | 1.5987 | 10.4934 |
| linalool                    | terpene   | monoterpenoid   | 11.5074 | 2.5926 | 4.066  | 5.0844 | 5.1709 | 8.159  | 3.3316  |
| endo-fenchol                | terpene   | monoterpenoid   | 3.1162  | 0.8612 | 3.291  | 2.9018 | 2.5978 | 2.184  | 2.7065  |
| α-terpineol                 | terpene   | monoterpenoid   | 2.0882  | 0.9597 | 2.0833 | 2.2016 | 1.7069 | 1.8632 | 2.1238  |
| β-pinene                    | terpene   | monoterpene     | 0.4141  | 2.9235 | 7.2345 | 3.5418 | 5.9615 | 4.7961 | 2.827   |
| (-)-guaiol                  | terpene   | sesquiterpenoid | 4.2564  | 0.0023 | 0.0078 | 0.0087 | 0.0059 | 0.0103 | 0.0106  |
| camphene                    | terpene   | monoterpene     | 0.8593  | 0.5725 | 0.991  | 0.5596 | 0.822  | 0.8335 | 0.4577  |
| endo-borneol                | terpene   | monoterpenoid   | 0.8734  | 0.2863 | 0.4913 | 0.5536 | 0.4101 | 0.4776 | 0.7657  |
| α-bisabolol                 | terpene   | sesquiterpenoid | 1.8241  | 0.8199 | 1.2141 | 5.1759 | 1.2977 | 1.5762 | 1.8005  |
| terpinolene                 | terpene   | monoterpene     | 0.3716  | 14.351 | 0.3507 | 0.1787 | 0.3028 | 0.3802 | 0.2444  |
| n-hexyl hexanoate           | flavorant | ester           | 0.1336  | 0.1076 | 0.0227 | 0.2127 | 0.1509 | 0.1448 | 1.2487  |
| trans-nerolidol             | terpene   | sesquiterpenoid | 0.3966  | 0.6463 | 0.1835 | 0.9418 | 0.1426 | 0.435  | 1.4892  |
| ethyl hexanoate             | flavorant | ester           | 0       | 0      | 0      | 0.0251 | 0      | 0.0354 | 0       |
| γ-terpinene                 | terpene   | monoterpene     | 0.1313  | 0.6888 | 0.2045 | 0.0815 | 0.186  | 0.097  | 0.0414  |
| n-hexyl acetate             | flavorant | ester           | 0.0341  | 0      | 0      | 0      | 0      | 0      | 0.0468  |
| isopulegol                  | terpene   | monoterpenoid   | 0.027   | 0.3333 | 0.4178 | 0.2395 | 0.3463 | 0.149  | 0.2007  |
| α-terpinene                 | terpene   | monoterpene     | 0.1399  | 0.8861 | 0.056  | 0.0586 | 0.0511 | 0.0752 | 0.0568  |
| n-propyl hexanoate          | flavorant | ester           | 0       | 0      | 0.0316 | 0      | 0.031  | 0      | 0       |
| 1-octanol                   | flavorant | alcohol         | 0.0497  | 0.0245 | 0.0353 | 0.0342 | 0.0348 | 0.0321 | 0.4394  |
| geraniol                    | terpene   | monoterpenoid   | 0.3395  | 0.1064 | 0.3839 | 0.0261 | 0.2652 | 0.2077 | 1.1484  |
| ethyl senecioate            | flavorant | ester           | 0.0349  | 0.0146 | 0.2033 | 0.0167 | 0.1454 | 0.0101 | 0.0098  |
| n-butyl senecioate          | flavorant | ester           | 0.0379  | 0      | 0      | 0.0401 | 0      | 0.0404 | 0.0381  |
| indole                      | flavorant | heterocycle     | 0.0323  | 0.0161 | 0      | 0.0352 | 0      | 0.0407 | 0.0354  |
| n-propyl senecioate         | flavorant | ester           | 0       | 0      | 0      | 0      | 0      | 0      | 0       |
| trans-sabinene hydrate      | terpene   | monoterpenoid   | 0.0097  | 0.113  | 0.0941 | 0.0785 | 0.0751 | 0.056  | 0.0543  |
| 2-heptanone                 | flavorant | ketone          | 0.052   | 0.0288 | 0.0353 | 0.0251 | 0.0499 | 0.0406 | 0.0367  |
| α-citral                    | terpene   | monoterpenoid   | 0       | 0      | 0      | 0      | 0.0383 | 0.0259 | 0       |
| isoamyl senecioate          | flavorant | ester           | 0.0272  | 0      | 0      | 0.0286 | 0      | 0      | 0.0271  |
| nonanal                     | flavorant | aldehyde        | 0.0238  | 0      | 0.0234 | 0.0497 | 0.026  | 0.0252 | 0.0218  |
| isoamyl hexanoate           | flavorant | ester           | 0       | 0.0074 | 0      | 0.0192 | 0      | 0      | 0.0153  |
| prenylthiol                 | flavorant | vsc             | 0.074   | 0.0061 | 0.2939 | 0.0249 | 0.2141 | 0.0515 | 0.0925  |
| 3-carene                    | terpene   | monoterpene     | 0.047   | 4.2249 | 0.0249 | 0.0213 | 0.0314 | 0.0268 | 0.0313  |
| methyl anthranilate         | flavorant | ester           | 0.0345  | 0.0284 | 0.0207 | 0.0241 | 0.0214 | 0.0247 | 0.0146  |
| n-octyl acetate             | flavorant | ester           | 0.0195  | 0.0058 | 0.0068 | 0.0071 | 0.0058 | 0.0073 | 0.1539  |
| n-octanal                   | flavorant | aldehyde        | 0       | 0      | 0      | 0      | 0      | 0      | 0       |
| n-hexyl n-butyrate          | flavorant | ester           | 0.0148  | 0.3566 | 0.014  | 0.016  | 0.0146 | 0.019  | 0.0741  |
| ethyl anthranilate          | flavorant | ester           | 0       | 0      | 0      | 0      | 0      | 0      | 0       |
| citronellol                 | terpene   | monoterpenoid   | 0.1239  | 0      | 0.0905 | 0.0591 | 0.0784 | 0.1377 | 0.027   |
| 3-mercaptopethyl acetate    | flavorant | vsc             | 0       | 0      | 0.0265 | 0      | 0      | 0      | 0.0206  |
| cherry propanol             | flavorant | alcohol         | 0.0135  | 0.7394 | 0.0168 | 0.0159 | 0.0137 | 0.0157 | 0.0259  |
| 1-decanol                   | flavorant | alcohol         | 0.0145  | 0.0204 | 0.0143 | 0.014  | 0.014  | 0      | 0.0569  |
| sulcatone                   | flavorant | ketone          | 0.0172  | 0.0355 | 0.0152 | 0.0193 | 0.0139 | 0.0229 | 0       |
| sabinene                    | terpene   | monoterpene     | 0.009   | 0.2946 | 0.0153 | 0.026  | 0.0153 | 0.016  | 0.0111  |
| methyl hexanoate            | flavorant | ester           | 0.0172  | 0.0125 | 0.0148 | 0.0163 | 0.0171 | 0.0159 | 0.0155  |
| ethyl isovalerate           | flavorant | ester           | 0.0122  | 0      | 0.0111 | 0      | 0      | 0.0146 | 0       |
| methyl octanoate            | flavorant | ester           | 0       | 0      | 0      | 0      | 0      | 0      | 0       |
| ethyl 2-methylbutyrate      | flavorant | ester           | 0       | 0      | 0.0029 | 0      | 0      | 0.0169 | 0       |
| n-propyl n-butyrate         | flavorant | ester           | 0       | 0      | 0      | 0      | 0      | 0.0086 | 0       |
| n-heptyl acetate            | flavorant | ester           | 0.0048  | 0      | 0.0048 | 0      | 0      | 0      | 0.0061  |
| ethyl isobutyrate           | flavorant | ester           | 0       | 0      | 0      | 0      | 0      | 0      | 0       |
| p-cymene                    | terpene   | monoterpene     | 0.0149  | 0.4663 | 0.0085 | 0.0082 | 0      | 0.008  | 0.0219  |
| cis-nerolidol               | terpene   | sesquiterpenoid | 0.0038  | 0      | 0      | 0.0075 | 0      | 0.0038 | 0       |
| hexyl 2-methylbutyrate      | flavorant | ester           | 0.0039  | 0.0112 | 0.0047 | 0.0042 | 0      | 0      | 0.0067  |
| ethyl n-butyrate            | flavorant | ester           | 0       | 0      | 0      | 0      | 0      | 0.036  | 0       |
| isobutyl hexanoate          | flavorant | ester           | 0       | 0      | 0      | 0      | 0      | 0      | 0       |
| cis-3-hexenyl n-butyrate    | flavorant | ester           | 0       | 0.0145 | 0      | 0      | 0      | 0      | 0       |
| n-hexyl isobutyrate         | flavorant | ester           | 0       | 0      | 0      | 0      | 0      | 0      | 0       |
| n-heptyl n-butyrate         | flavorant | ester           | 0.0051  | 0.0202 | 0      | 0      | 0      | 0      | 0       |
| methyl n-methylanthranilate | flavorant | ester           | 0.0073  | 0      | 0      | 0      | 0      | 0      | 0       |
| phenylethyl n-butyrate      | flavorant | ester           | 0       | 0      | 0      | 0.0062 | 0      | 0      | 0       |
| isobutyl n-butyrate         | flavorant | ester           | 0       | 0      | 0      | 0      | 0      | 0      | 0       |
| citronellol acetate         | flavorant | ester           | 0.0196  | 0      | 0.004  | 0.0124 | 0.0034 | 0.0089 | 0.004   |

|                          |           |             |        |   |        |        |        |        |        |
|--------------------------|-----------|-------------|--------|---|--------|--------|--------|--------|--------|
| phenylethyl isobutyrate  | flavorant | ester       | 0      | 0 | 0      | 0      | 0      | 0      | 0      |
| isopropyl isobutyrate    | flavorant | ester       | 0.0065 | 0 | 0      | 0      | 0      | 0      | 0      |
| n-hexyl senecioate       | flavorant | ester       | 0.0329 | 0 | 0.0278 | 0      | 0.0277 | 0      | 0      |
| isopropyl senecioate     | flavorant | ester       | 0.0481 | 0 | 0.0312 | 0      | 0.0301 | 0      | 0      |
| hexanal                  | flavorant | aldehyde    | 0.015  | 0 | 0      | 0.0133 | 0      | 0.0147 | 0      |
| phenylethyl propionate   | flavorant | ester       | 0      | 0 | 0      | 0.01   | 0      | 0      | 0.0118 |
| isobutyl isobutyrate     | flavorant | ester       | 0      | 0 | 0      | 0      | 0      | 0      | 0      |
| melonal                  | flavorant | aldehyde    | 0.005  | 0 | 0      | 0.0054 | 0      | 0.0054 | 0.005  |
| 3-mercaptohexanol        | flavorant | vsc         | 0      | 0 | 0      | 0      | 0      | 0      | 0      |
| 6-amyl- $\alpha$ -pyrone | flavorant | lactone     | 0.0050 | 0 | 0      | 0      | 0      | 0      | 0      |
| 3-mercaptohexyl butyrate | flavorant | vsc         | 0      | 0 | 0      | 0      | 0      | 0      | 0      |
| methyl senecioate        | flavorant | ester       | 0.0235 | 0 | 0.0366 | 0      | 0.0302 | 0      | 0      |
| skatole                  | flavorant | heterocycle | 0      | 0 | 0      | 0      | 0      | 0      | 0      |
| n-decyl acetate          | flavorant | ester       | 0      | 0 | 0      | 0      | 0      | 0      | 0      |

**Table S14.** Analyte concentrations ( $\mu\text{g}/\text{mg}$ ) (5/5).

| Compound name           | type      | subtype         | Pie Hoe     | Cookies and Cream | GMO Cookies | OG       | 710 chem   | GMO        |
|-------------------------|-----------|-----------------|-------------|-------------------|-------------|----------|------------|------------|
| <b>Exotic score</b>     | <b>NA</b> | <b>NA</b>       | <b>25.3</b> | <b>15.4</b>       | <b>5.7</b>  | <b>3</b> | <b>1.9</b> | <b>1.7</b> |
| d-limonene              | terpene   | monoterpene     | 15.8407     | 17.6323           | 25.2498     | 25.7865  | 16.4857    | 24.5405    |
| caryophyllene           | terpene   | sesquiterpene   | 17.7841     | 34.0783           | 29.9326     | 20.6312  | 35.1996    | 15.0594    |
| $\alpha$ -pinene        | terpene   | monoterpene     | 1.601       | 1.8241            | 3.0744      | 2.1525   | 1.2337     | 1.8156     |
| trans- $\beta$ -ocimene | terpene   | monoterpene     | 0.0281      | 0.0472            | 0.0469      | 0.0594   | 0.046      | 0.0528     |
| humulene                | terpene   | sesquiterpene   | 6.139       | 10.9633           | 13.7882     | 6.8673   | 9.1274     | 7.0209     |
| $\beta$ -myrcene        | terpene   | monoterpene     | 15.9356     | 4.7757            | 11.5495     | 19.0079  | 7.9803     | 18.7704    |
| linalool                | terpene   | monoterpenoid   | 10.6298     | 3.2682            | 3.286       | 12.3449  | 0.0343     | 3.2623     |
| endo-fenchol            | terpene   | monoterpenoid   | 1.7666      | 1.3177            | 2.6743      | 3.8153   | 2.1029     | 2.1722     |
| $\alpha$ -terpineol     | terpene   | monoterpenoid   | 1.3884      | 0.9837            | 1.4604      | 3.4542   | 1.4519     | 1.669      |
| $\beta$ -pinene         | terpene   | monoterpene     | 2.6247      | 3.3774            | 1.6553      | 4.5607   | 2.446      | 3.1151     |
| (-)-guaiol              | terpene   | sesquiterpenoid | 0.0091      | 0.0143            | 0.0283      | 0.0139   | 0.0162     | 0.011      |
| camphene                | terpene   | monoterpene     | 0.4548      | 0.5457            | 0.7009      | 0.6728   | 0.3704     | 0.51       |
| endo-borneol            | terpene   | monoterpenoid   | 0.4991      | 0.3685            | 0.6457      | 1.0104   | 0.4798     | 0.5736     |
| $\alpha$ -bisabolol     | terpene   | sesquiterpenoid | 1.5905      | 0.7495            | 4.9999      | 1.4106   | 1.5455     | 2.1558     |
| terpinolene             | terpene   | monoterpene     | 0.1106      | 0.1885            | 0.4581      | 0.3244   | 0.225      | 0.2675     |
| n-hexyl hexanoate       | flavorant | ester           | 0.4436      | 0.0963            | 0.3373      | 1.1202   | 0.5615     | 0.8012     |
| trans-nerolidol         | terpene   | sesquiterpenoid | 0.0284      | 0.5606            | 0.6585      | 0        | 1.1922     | 0.7709     |
| ethyl hexanoate         | flavorant | ester           | 0           | 0                 | 0           | 0.0258   | 0          | 0          |
| $\gamma$ -terpinene     | terpene   | monoterpene     | 0.0462      | 0.0475            | 0.1612      | 0.0597   | 0.0356     | 0.141      |
| n-hexyl acetate         | flavorant | ester           | 0.0252      | 0                 | 0.0307      | 0.0266   | 0          | 0.0254     |
| isopulegol              | terpene   | monoterpenoid   | 0.1573      | 0.1722            | 0.0355      | 0.5873   | 0.2854     | 0.1849     |
| $\alpha$ -terpinene     | terpene   | monoterpene     | 0.0611      | 0.0466            | 0.1452      | 0.0658   | 0.0501     | 0.0941     |
| n-propyl hexanoate      | flavorant | ester           | 0.0178      | 0                 | 0.0296      | 0        | 0.0236     | 0.0248     |
| 1-octanol               | flavorant | alcohol         | 0.1047      | 0.0336            | 0.0361      | 0.0446   | 0.0342     | 0.0316     |
| geraniol                | terpene   | monoterpenoid   | 0.3287      | 0.0344            | 0.0506      | 0.3603   | 0.1365     | 0.0339     |
| ethyl senecioate        | flavorant | ester           | 0.0376      | 0.2098            | 0.0975      | 0        | 0.027      | 0.0172     |
| n-butyl senecioate      | flavorant | ester           | 0.0382      | 0                 | 0           | 0        | 0.0431     | 0.0395     |
| indole                  | flavorant | heterocycle     | 0.0354      | 0.0315            | 0.0316      | 0.033    | 0.0414     | 0          |
| n-propyl senecioate     | flavorant | ester           | 0           | 0.0393            | 0           | 0        | 0          | 0          |
| trans-sabinene hydrate  | terpene   | monoterpenoid   | 0.0507      | 0.0748            | 0.0157      | 0.1027   | 0.0495     | 0.0438     |
| 2-heptanone             | flavorant | ketone          | 0.0332      | 0.0264            | 0.0284      | 0.0286   | 0.0338     | 0.0338     |
| $\alpha$ -citral        | terpene   | monoterpenoid   | 0.0152      | 0.0267            | 0           | 0        | 0          | 0          |
| isoamyl senecioate      | flavorant | ester           | 0.0273      | 0.0271            | 0.0284      | 0        | 0.0293     | 0.028      |
| nonanal                 | flavorant | aldehyde        | 0           | 0.0431            | 0           | 0        | 0.0243     | 0          |
| isoamyl hexanoate       | flavorant | ester           | 0           | 0                 | 0           | 0.0466   | 0.1424     | 0.0095     |
| prenylthiol             | flavorant | vsc             | 0.1175      | 0.0516            | 0.0946      | 0.0724   | 0.1541     | 0.1535     |
| 3-carene                | terpene   | monoterpene     | 0.0371      | 0.0215            | 0.037       | 0.0368   | 0.0259     | 0.0396     |
| methyl anthranilate     | flavorant | ester           | 0.0159      | 0.0197            | 0.0173      | 0        | 0          | 0.015      |
| n-octyl acetate         | flavorant | ester           | 0.039       | 0.0082            | 0.0079      | 0.0105   | 0.0104     | 0          |
| n-octanal               | flavorant | aldehyde        | 0           | 0.0163            | 0           | 0        | 0          | 0          |
| n-hexyl n-butyrate      | flavorant | ester           | 0.0153      | 0.0117            | 0.0096      | 0.0208   | 0.0222     | 0.0362     |
| ethyl anthranilate      | flavorant | ester           | 0           | 0                 | 0           | 0        | 0          | 0          |
| citronellol             | terpene   | monoterpenoid   | 0.1081      | 0.0296            | 0.0522      | 0.3528   | 0.0249     | 0.0243     |

|                             |           |                 |        |        |        |        |        |        |
|-----------------------------|-----------|-----------------|--------|--------|--------|--------|--------|--------|
| 3-mercaptohexyl acetate     | flavorant | vsc             | 0      | 0      | 0      | 0      | 0      | 0      |
| cherry propanol             | flavorant | alcohol         | 0.0254 | 0.0158 | 0.0154 | 0.0183 | 0.0126 | 0.0184 |
| 1-decanol                   | flavorant | alcohol         | 0.0206 | 0.0124 | 0.013  | 0.0161 | 0      | 0      |
| sulcatone                   | flavorant | ketone          | 0      | 0.0222 | 0.014  | 0.0133 | 0      | 0      |
| sabinene                    | terpene   | monoterpene     | 0.0139 | 0.0147 | 0.0115 | 0.0216 | 0.0136 | 0.0121 |
| methyl hexanoate            | flavorant | ester           | 0.0149 | 0.0154 | 0      | 0.0147 | 0.0185 | 0.0136 |
| ethyl isovalerate           | flavorant | ester           | 0.0105 | 0.0108 | 0      | 0      | 0.0108 | 0      |
| methyl octanoate            | flavorant | ester           | 0      | 0.0016 | 0.0032 | 0      | 0      | 0      |
| ethyl 2-methylbutyrate      | flavorant | ester           | 0      | 0.0026 | 0      | 0      | 0      | 0      |
| n-propyl n-butyrate         | flavorant | ester           | 0      | 0      | 0      | 0      | 0      | 0      |
| n-heptyl acetate            | flavorant | ester           | 0.0043 | 0      | 0      | 0.0045 | 0      | 0      |
| ethyl isobutyrate           | flavorant | ester           | 0.004  | 0      | 0      | 0      | 0      | 0.0024 |
| p-cymene                    | terpene   | monoterpene     | 0.0235 | 0.0067 | 0.1023 | 0.0051 | 0.0045 | 0.0172 |
| cis-nerolidol               | terpene   | sesquiterpenoid | 0      | 0.011  | 0.0081 | 0.004  | 0      | 0      |
| hexyl 2-methylbutyrate      | flavorant | ester           | 0      | 0.004  | 0.0046 | 0.006  | 0.0052 | 0.0044 |
| ethyl n-butyrate            | flavorant | ester           | 0      | 0      | 0      | 0      | 0      | 0      |
| isobutyl hexanoate          | flavorant | ester           | 0      | 0      | 0      | 0      | 0      | 0      |
| cis-3-hexenyl n-butyrate    | flavorant | ester           | 0      | 0      | 0      | 0      | 0      | 0      |
| n-hexyl isobutyrate         | flavorant | ester           | 0      | 0      | 0      | 0.0156 | 0      | 0.017  |
| n-heptyl n-butyrate         | flavorant | ester           | 0      | 0      | 0      | 0      | 0      | 0      |
| methyl n-methylanthranilate | flavorant | ester           | 0      | 0      | 0      | 0      | 0      | 0      |
| phenylethyl n-butyrate      | flavorant | ester           | 0      | 0      | 0      | 0      | 0      | 0      |
| isobutyl n-butyrate         | flavorant | ester           | 0      | 0      | 0      | 0      | 0      | 0      |
| citronellol acetate         | flavorant | ester           | 0.0165 | 0.005  | 0.0076 | 0.0487 | 0.0017 | 0.0073 |
| phenylethyl isobutyrate     | flavorant | ester           | 0      | 0      | 0      | 0      | 0      | 0      |
| isopropyl isobutyrate       | flavorant | ester           | 0      | 0      | 0      | 0      | 0      | 0      |
| n-hexyl senecioate          | flavorant | ester           | 0.029  | 0.0266 | 0.0374 | 0      | 0      | 0.0293 |
| isopropyl senecioate        | flavorant | ester           | 0.0309 | 0.0291 | 0      | 0      | 0      | 0.0305 |
| hexanal                     | flavorant | aldehyde        | 0      | 0.015  | 0      | 0.0163 | 0      | 0      |
| phenylethyl propionate      | flavorant | ester           | 0      | 0      | 0      | 0      | 0      | 0      |
| isobutyl isobutyrate        | flavorant | ester           | 0      | 0      | 0      | 0      | 0      | 0      |
| melonal                     | flavorant | aldehyde        | 0      | 0.0055 | 0      | 0      | 0.0053 | 0.0051 |
| 3-mercaptohexanol           | flavorant | vsc             | 0      | 0      | 0      | 0      | 0      | 0      |
| 6-amil- $\alpha$ -pyrone    | flavorant | lactone         | 0.0025 | 0      | 0      | 0      | 0      | 0      |
| 3-mercaptohexyl butyrate    | flavorant | vsc             | 0      | 0      | 0      | 0      | 0      | 0      |
| methyl senecioate           | flavorant | ester           | 0.0236 | 0.0228 | 0.0257 | 0      | 0      | 0.0335 |
| skatole                     | flavorant | heterocycle     | 0      | 0      | 0.0139 | 0      | 0.0145 | 0.0187 |
| n-decyl acetate             | flavorant | ester           | 0      | 0      | 0      | 0      | 0      | 0      |

**Table S15.** Analyte Relative-% of volatile fraction (1/5).

| Compound name           | type      | subtype         | Grape Pie x Do-Si-Do | Juice Man   | Papaya Peach | Cake Crasher | Starburst 36 #1 | Upsidedown frown #5 |
|-------------------------|-----------|-----------------|----------------------|-------------|--------------|--------------|-----------------|---------------------|
| <b>Exotic score</b>     | <b>NA</b> | <b>NA</b>       | <b>87.4</b>          | <b>87.1</b> | <b>86.3</b>  | <b>83.7</b>  | <b>81.7</b>     | <b>80.7</b>         |
| d-limonene              | terpene   | monoterpene     | 33.9681              | 34.0391     | 26.7979      | 27.9894      | 18.8864         | 19.238              |
| caryophyllene           | terpene   | sesquiterpene   | 17.9084              | 8.986       | 9.6673       | 25.5693      | 17.5143         | 15.1561             |
| $\alpha$ -pinene        | terpene   | monoterpene     | 4.1097               | 4.0825      | 3.3447       | 5.1768       | 1.3688          | 1.0034              |
| trans- $\beta$ -ocimene | terpene   | monoterpene     | 0.2389               | 0.2345      | 0.2368       | 6.7051       | 0.1912          | 0.2532              |
| humulene                | terpene   | sesquiterpene   | 6.2194               | 4.0797      | 3.443        | 5.4505       | 8.926           | 5.6294              |
| $\beta$ -myrcene        | terpene   | monoterpene     | 10.4505              | 14.3164     | 28.41        | 2.485        | 11.7244         | 11.8777             |
| linalool                | terpene   | monoterpenoid   | 9.9745               | 13.3519     | 11.2688      | 9.2874       | 17.1579         | 27.3382             |
| endo-fenchol            | terpene   | monoterpenoid   | 3.305                | 4.4038      | 2.8977       | 1.9666       | 2.4739          | 4.3107              |
| $\alpha$ -terpineol     | terpene   | monoterpenoid   | 2.1715               | 2.7618      | 1.7568       | 1.6885       | 2.2503          | 3.8001              |
| $\beta$ -pinene         | terpene   | monoterpene     | 1.4803               | 0.9631      | 1.1309       | 5.467        | 2.7832          | 2.2043              |
| (-)-guaiol              | terpene   | sesquiterpenoid | 2.795                | 3.7684      | 3.1426       | 2.2464       | 6.3121          | 0.0338              |
| camphene                | terpene   | monoterpene     | 1.1123               | 1.129       | 0.9109       | 0.711        | 0.4456          | 0.3958              |
| endo-borneol            | terpene   | monoterpenoid   | 0.8753               | 1.2894      | 0.9281       | 0.4246       | 0.6903          | 0.9466              |
| $\alpha$ -bisabolol     | terpene   | sesquiterpenoid | 2.9783               | 2.2124      | 2.3334       | 0.9024       | 3.3547          | 2.6906              |
| terpinolene             | terpene   | monoterpene     | 0.5237               | 0.5211      | 0.4172       | 0.3688       | 0.2729          | 0.3545              |

|                             |           |                 |        |        |        |        |        |        |
|-----------------------------|-----------|-----------------|--------|--------|--------|--------|--------|--------|
| n-hexyl hexanoate           | flavorant | ester           | 0.1544 | 0.4918 | 0.2511 | 0.1978 | 0.1904 | 0.2542 |
| trans-nerolidol             | terpene   | sesquiterpenoid | 0.0948 | 0.9261 | 0.6219 | 0.0346 | 1.6889 | 1.5269 |
| ethyl hexanoate             | flavorant | ester           | 0.2271 | 0.0503 | 0      | 1.4993 | 0.2674 | 0.1938 |
| $\gamma$ -terpinene         | terpene   | monoterpene     | 0.1276 | 0.1639 | 0.1595 | 0.1017 | 0.0776 | 0.1133 |
| n-hexyl acetate             | flavorant | ester           | 0.0304 | 0.041  | 0.0276 | 0      | 0.0577 | 0      |
| isopulegol                  | terpene   | monoterpenoid   | 0.1051 | 0.0626 | 0.0516 | 0.2795 | 0.2728 | 0.3338 |
| $\alpha$ -terpinene         | terpene   | monoterpene     | 0.1028 | 0.11   | 0.1223 | 0.0395 | 0.0734 | 0.1077 |
| n-propyl hexanoate          | flavorant | ester           | 0.0429 | 0.0527 | 0.0302 | 0.0863 | 0.057  | 0.0442 |
| 1-octanol                   | flavorant | alcohol         | 0.0446 | 0.0736 | 0.0372 | 0.1377 | 0.6827 | 0.0841 |
| geraniol                    | terpene   | monoterpenoid   | 0.1294 | 0.1439 | 0.0478 | 0.118  | 0.2285 | 0.1535 |
| ethyl senecioate            | flavorant | ester           | 0.2084 | 0.196  | 0.1312 | 0.0933 | 0.5852 | 0.0211 |
| n-butyl senecioate          | flavorant | ester           | 0      | 0      | 0      | 0.0403 | 0.0569 | 0      |
| indole                      | flavorant | heterocycle     | 0.0412 | 0.0424 | 0.0401 | 0.0335 | 0      | 0.0991 |
| n-propyl senecioate         | flavorant | ester           | 0      | 0.0495 | 0.0407 | 0.0355 | 0.0667 | 0      |
| trans-sabinene hydrate      | terpene   | monoterpenoid   | 0.0231 | 0.0147 | 0.0154 | 0.0775 | 0.0653 | 0.0849 |
| 2-heptanone                 | flavorant | ketone          | 0.0332 | 0.038  | 0.0328 | 0.0975 | 0.1074 | 0.0978 |
| $\alpha$ -citral            | terpene   | monoterpenoid   | 0      | 0      | 0.0245 | 0.0211 | 0.0238 | 0.0418 |
| isoamyl senecioate          | flavorant | ester           | 0.0354 | 0      | 0.0414 | 0      | 0.0423 | 0      |
| nonanal                     | flavorant | aldehyde        | 0.0331 | 0.0296 | 0.0243 | 0.0212 | 0.0328 | 0      |
| isoamyl hexanoate           | flavorant | ester           | 0.0231 | 0.1348 | 0.0169 | 0.0102 | 0.0515 | 0.0891 |
| prenylthiol                 | flavorant | vsc             | 0.0963 | 0.0724 | 0.0384 | 0.3245 | 0.015  | 0.6518 |
| 3-carene                    | terpene   | monoterpene     | 0.0317 | 0.0449 | 0.0643 | 0.0124 | 0.0346 | 0.0548 |
| methyl anthranilate         | flavorant | ester           | 0.0233 | 0.0347 | 0.0389 | 0.0249 | 0.0289 | 0.044  |
| n-octyl acetate             | flavorant | ester           | 0.0087 | 0.0393 | 0.0275 | 0.0249 | 0.0531 | 0.0386 |
| n-octanal                   | flavorant | aldehyde        | 0      | 0      | 0      | 0      | 0      | 0      |
| n-hexyl n-butyrate          | flavorant | ester           | 0.0155 | 0.717  | 1.0439 | 0.0229 | 0.0259 | 0.0198 |
| ethyl anthranilate          | flavorant | ester           | 0      | 0      | 0.0202 | 0      | 0      | 0.0373 |
| citronellol                 | terpene   | monoterpenoid   | 0.0465 | 0.0497 | 0.0161 | 0.0366 | 0.0433 | 0.0591 |
| 3-mercaptohexyl acetate     | flavorant | vsc             | 0      | 0      | 0.0214 | 0      | 0.0535 | 0.0356 |
| cherry propanol             | flavorant | alcohol         | 0.0162 | 0.0222 | 0.0149 | 0.0124 | 0.0206 | 0.0266 |
| 1-decanol                   | flavorant | alcohol         | 0.0159 | 0.0211 | 0.0141 | 0.0215 | 0.1665 | 0      |
| sulcatone                   | flavorant | ketone          | 0.0168 | 0.0181 | 0.0139 | 0      | 0.0212 | 0      |
| sabinene                    | terpene   | monoterpene     | 0.0131 | 0.0122 | 0.0129 | 0.0159 | 0.0181 | 0.0296 |
| methyl hexanoate            | flavorant | ester           | 0      | 0.0177 | 0.0153 | 0.0236 | 0.052  | 0.0445 |
| ethyl isovalerate           | flavorant | ester           | 0.0196 | 0.0149 | 0.0117 | 0.0162 | 0.0253 | 0      |
| methyl octanoate            | flavorant | ester           | 0      | 0      | 0      | 0      | 0      | 0.1347 |
| ethyl 2-methylbutyrate      | flavorant | ester           | 0.0069 | 0.0046 | 0.0028 | 0.0215 | 0.0142 | 0.0049 |
| n-propyl n-butyrate         | flavorant | ester           | 0      | 0      | 0      | 0.0076 | 0      | 0      |
| n-heptyl acetate            | flavorant | ester           | 0      | 0      | 0      | 0.0051 | 0.0081 | 0.0096 |
| ethyl isobutyrate           | flavorant | ester           | 0.0086 | 0.0108 | 0.0026 | 0      | 0.0245 | 0.0117 |
| p-cymene                    | terpene   | monoterpene     | 0.009  | 0.0075 | 0.0065 | 0.0054 | 0.0096 | 0.013  |
| cis-nerolidol               | terpene   | sesquiterpenoid | 0      | 0.0048 | 0      | 0.0073 | 0.0122 | 0.0095 |
| hexyl 2-methylbutyrate      | flavorant | ester           | 0      | 0.0137 | 0.0194 | 0.0044 | 0.0069 | 0      |
| ethyl n-butyrate            | flavorant | ester           | 0.0014 | 0      | 0      | 0      | 0      | 0      |
| isobutyl hexanoate          | flavorant | ester           | 0      | 0.0039 | 0      | 0      | 0.0123 | 0      |
| cis-3-hexenyl n-butyrate    | flavorant | ester           | 0      | 0.0425 | 0.0096 | 0      | 0      | 0      |
| n-hexyl isobutyrate         | flavorant | ester           | 0      | 0.0365 | 0.05   | 0      | 0.1276 | 0.029  |
| n-heptyl n-butyrate         | flavorant | ester           | 0.0102 | 0.0129 | 0.0323 | 0      | 0      | 0.0287 |
| methyl n-methylanthranilate | flavorant | ester           | 0      | 0.0108 | 0.0114 | 0      | 0      | 0      |
| phenylethyl n-butyrate      | flavorant | ester           | 0      | 0.0094 | 0.0533 | 0      | 0      | 0      |
| isobutyl n-butyrate         | flavorant | ester           | 0      | 0.0088 | 0.0061 | 0      | 0.0077 | 0      |
| citronellol acetate         | flavorant | ester           | 0.0049 | 0.0084 | 0.0022 | 0.0025 | 0.003  | 0.0087 |
| phenylethyl isobutyrate     | flavorant | ester           | 0      | 0.0007 | 0.0047 | 0      | 0.0019 | 0      |
| isopropyl isobutyrate       | flavorant | ester           | 0      | 0      | 0      | 0      | 0      | 0      |
| n-hexyl senecioate          | flavorant | ester           | 0.0334 | 0      | 0      | 0      | 0.0434 | 0.1304 |
| isopropyl senecioate        | flavorant | ester           | 0.0394 | 0      | 0.0315 | 0.0314 | 0.0645 | 0      |
| hexanal                     | flavorant | aldehyde        | 0      | 0      | 0      | 0.0158 | 0.0208 | 0.0322 |
| phenylethyl propionate      | flavorant | ester           | 0      | 0      | 0.0112 | 0      | 0      | 0      |
| isobutyl isobutyrate        | flavorant | ester           | 0      | 0      | 0      | 0      | 0      | 0      |
| melonal                     | flavorant | aldehyde        | 0      | 0      | 0      | 0      | 0      | 0.0113 |
| 3-mercaptohexanol           | flavorant | vsc             | 0      | 0      | 0      | 0      | 0.1053 | 0      |
| 6-amil- $\alpha$ -pyrone    | flavorant | lactone         | 0      | 0      | 0      | 0.0057 | 0.0095 | 0.0057 |

|                          |           |             |   |   |   |   |   |        |
|--------------------------|-----------|-------------|---|---|---|---|---|--------|
| 3-mercaptohexyl butyrate | flavorant | vsc         | 0 | 0 | 0 | 0 | 0 | 0.0326 |
| methyl senecioate        | flavorant | ester       | 0 | 0 | 0 | 0 | 0 | 0      |
| skatole                  | flavorant | heterocycle | 0 | 0 | 0 | 0 | 0 | 0      |
| n-decyl acetate          | flavorant | ester       | 0 | 0 | 0 | 0 | 0 | 0      |

**Table S16.** Analyte Relative-% of volatile fraction (2/5).

| Compound name           | type      | subtype         | Zkittlez 710 | Banana Scream | Bubblegum Zkittlez | TK x Butterscotch | Purple Churro | Pure Guava |
|-------------------------|-----------|-----------------|--------------|---------------|--------------------|-------------------|---------------|------------|
| <b>Exotic score</b>     | <b>NA</b> | <b>NA</b>       | <b>80.1</b>  | <b>79.7</b>   | <b>77</b>          | <b>76.3</b>       | <b>74.3</b>   | <b>74</b>  |
| d-limonene              | terpene   | monoterpene     | 16.1753      | 36.2481       | 11.3096            | 32.6762           | 29.7709       | 14.1172    |
| caryophyllene           | terpene   | sesquiterpene   | 35.0699      | 15.8363       | 11.781             | 17.3976           | 17.5779       | 34.4578    |
| $\alpha$ -pinene        | terpene   | monoterpene     | 1.6339       | 9.2041        | 11.9776            | 3.3704            | 5.6369        | 0.9875     |
| trans- $\beta$ -ocimene | terpene   | monoterpene     | 0.1083       | 6.797         | 1.2231             | 0.2441            | 2.3712        | 1.2253     |
| humulene                | terpene   | sesquiterpene   | 13.7972      | 6.1428        | 4.5072             | 7.2931            | 4.4544        | 14.6224    |
| $\beta$ -myrcene        | terpene   | monoterpene     | 1.1395       | 4.9778        | 42.8863            | 14.2805           | 3.572         | 16.2345    |
| linalool                | terpene   | monoterpenoid   | 16.7118      | 4.0804        | 3.8872             | 8.7946            | 13.2772       | 7.3829     |
| endo-fenchol            | terpene   | monoterpenoid   | 1.7536       | 3.8643        | 1.9405             | 3.0345            | 4.3089        | 1.7524     |
| $\alpha$ -terpineol     | terpene   | monoterpenoid   | 1.312        | 2.3427        | 1.1978             | 1.8347            | 2.8673        | 1.2691     |
| $\beta$ -pinene         | terpene   | monoterpene     | 3.1175       | 2.1542        | 2.0376             | 2.171             | 4.7765        | 1.8131     |
| (-)-guaiol              | terpene   | sesquiterpenoid | 0.0429       | 1.7868        | 0.0686             | 0.4061            | 0.0466        | 0.0246     |
| camphene                | terpene   | monoterpene     | 0.4977       | 1.3363        | 0.9348             | 0.9028            | 1.1797        | 0.2946     |
| endo-borneol            | terpene   | monoterpenoid   | 0.3882       | 1.2805        | 0.9222             | 0.8031            | 0.898         | 0.5005     |
| $\alpha$ -bisabolol     | terpene   | sesquiterpenoid | 1.8548       | 1.0847        | 1.5642             | 1.5941            | 0.8111        | 1.6215     |
| terpinolene             | terpene   | monoterpene     | 0.2191       | 0.5332        | 0.2359             | 0.4694            | 0.4152        | 0.0611     |
| n-hexyl hexanoate       | flavorant | ester           | 0.658        | 0.3557        | 0.6466             | 1.0974            | 4.8248        | 0.2776     |
| trans-nerolidol         | terpene   | sesquiterpenoid | 1.7558       | 0.2733        | 0.9418             | 1.3242            | 0.8343        | 1.8181     |
| ethyl hexanoate         | flavorant | ester           | 0.0222       | 0.2348        | 0                  | 0                 | 0.0259        | 0          |
| $\gamma$ -terpinene     | terpene   | monoterpene     | 0.0432       | 0.1912        | 0.1451             | 0.1393            | 0.1323        | 0.0775     |
| n-hexyl acetate         | flavorant | ester           | 0.0714       | 0.1466        | 0.0666             | 0.0273            | 0.0782        | 0.0395     |
| isopulegol              | terpene   | monoterpenoid   | 0.2102       | 0.122         | 0.0793             | 0.1394            | 0.1846        | 0.1471     |
| $\alpha$ -terpinene     | terpene   | monoterpene     | 0.0288       | 0.1161        | 0.1884             | 0.0879            | 0.0862        | 0.078      |
| n-propyl hexanoate      | flavorant | ester           | 0.0177       | 0.0725        | 0.028              | 0.0366            | 0.0304        | 0.0207     |
| 1-octanol               | flavorant | alcohol         | 1.2942       | 0.054         | 0.1571             | 0.0402            | 0.3835        | 0.0446     |
| geraniol                | terpene   | monoterpenoid   | 0.7283       | 0.045         | 0.0418             | 0.0745            | 0.0691        | 0.1134     |
| ethyl senecioate        | flavorant | ester           | 0.0105       | 0.0437        | 0.0153             | 0.0406            | 0.011         | 0.0723     |
| n-butyl senecioate      | flavorant | ester           | 0.0281       | 0.0421        | 0                  | 0                 | 0.0409        | 0.0561     |
| indole                  | flavorant | heterocycle     | 0.0309       | 0.0421        | 0.0777             | 0.0517            | 0.0531        | 0.0454     |
| n-propyl senecioate     | flavorant | ester           | 0            | 0.042         | 0                  | 0                 | 0             | 0          |
| trans-sabinene hydrate  | terpene   | monoterpenoid   | 0.0408       | 0.0409        | 0.0209             | 0.0283            | 0.0455        | 0.0685     |
| 2-heptanone             | flavorant | ketone          | 0.0253       | 0.0359        | 0.0438             | 0.0292            | 0.0393        | 0.0539     |
| $\alpha$ -citral        | terpene   | monoterpenoid   | 0.0141       | 0.0302        | 0.0236             | 0                 | 0.0176        | 0.031      |
| isoamyl senecioate      | flavorant | ester           | 0.0198       | 0.0295        | 0.0371             | 0                 | 0.029         | 0.0452     |
| nonanal                 | flavorant | aldehyde        | 0.0157       | 0.0277        | 0.0316             | 0                 | 0.0228        | 0.0289     |
| isoamyl hexanoate       | flavorant | ester           | 0.0087       | 0.027         | 0.0123             | 0.0813            | 0.208         | 0          |
| prenylthiol             | flavorant | vsc             | 0.0656       | 0.0258        | 0.1003             | 0.0514            | 0.2451        | 0.1418     |
| 3-carene                | terpene   | monoterpene     | 0.0112       | 0.0242        | 0.096              | 0.0405            | 0.0236        | 0.0411     |
| methyl anthranilate     | flavorant | ester           | 0.0133       | 0.0204        | 0.0371             | 0                 | 0.0231        | 0.0247     |
| n-octyl acetate         | flavorant | ester           | 0.21         | 0.0204        | 0.0588             | 0.0278            | 0.1697        | 0.0084     |
| n-octanal               | flavorant | aldehyde        | 0            | 0.0192        | 0                  | 0                 | 0             | 0          |
| n-hexyl n-butyrate      | flavorant | ester           | 0.0683       | 0.0191        | 0.103              | 1.027             | 0.1914        | 0.0122     |
| ethyl anthranilate      | flavorant | ester           | 0            | 0.0186        | 0.0231             | 0                 | 0.0179        | 0          |
| citronellol             | terpene   | monoterpenoid   | 0.4176       | 0.0181        | 0.249              | 0.0431            | 0.0282        | 0.0214     |
| 3-mercaptohexyl acetate | flavorant | vsc             | 0            | 0.0173        | 0                  | 0.0177            | 0.0171        | 0.0844     |
| cherry propanol         | flavorant | alcohol         | 0.009        | 0.0163        | 0.0189             | 0.0172            | 0.0147        | 0.0353     |
| 1-decanol               | flavorant | alcohol         | 0.1474       | 0.0154        | 0.0313             | 0.0144            | 0.058         | 0.0207     |
| sulcatone               | flavorant | ketone          | 0.0096       | 0.0154        | 0                  | 0                 | 0.0169        | 0          |
| sabinene                | terpene   | monoterpene     | 0.01         | 0.0153        | 0.0232             | 0.0171            | 0.0182        | 0.0207     |
| methyl hexanoate        | flavorant | ester           | 0.0108       | 0.015         | 0.0198             | 0                 | 0.0155        | 0          |
| ethyl isovalerate       | flavorant | ester           | 0            | 0.0143        | 0.0201             | 0                 | 0             | 0          |
| methyl octanoate        | flavorant | ester           | 0.0011       | 0.014         | 0                  | 0                 | 0             | 0          |
| ethyl 2-methylbutyrate  | flavorant | ester           | 0.0017       | 0.0131        | 0                  | 0                 | 0             | 0          |
| n-propyl n-butyrate     | flavorant | ester           | 0            | 0.0102        | 0                  | 0                 | 0             | 0          |
| n-heptyl acetate        | flavorant | ester           | 0.0119       | 0.0073        | 0.0074             | 0.0052            | 0.0074        | 0          |

|                             |           |                 |        |        |        |        |        |        |
|-----------------------------|-----------|-----------------|--------|--------|--------|--------|--------|--------|
| ethyl isobutyrate           | flavorant | ester           | 0      | 0.0071 | 0.0032 | 0.0134 | 0.0028 | 0      |
| p-cymene                    | terpene   | monoterpene     | 0.0032 | 0.0065 | 0.0185 | 0.0064 | 0.006  | 0.0366 |
| cis-nerolidol               | terpene   | sesquiterpenoid | 0.0066 | 0.0049 | 0.0086 | 0.0049 | 0.0045 | 0      |
| hexyl 2-methylbutyrate      | flavorant | ester           | 0.006  | 0.0045 | 0.0096 | 0.0323 | 0.0054 | 0      |
| ethyl n-butyrate            | flavorant | ester           | 0      | 0.004  | 0      | 0      | 0      | 0      |
| isobutyl hexanoate          | flavorant | ester           | 0      | 0      | 0      | 0      | 0      | 0      |
| cis-3-hexenyl n-butyrate    | flavorant | ester           | 0      | 0      | 0.0127 | 0.0692 | 0.0113 | 0      |
| n-hexyl isobutyrate         | flavorant | ester           | 0.0166 | 0      | 0.0278 | 0.0426 | 0.0209 | 0      |
| n-heptyl n-butyrate         | flavorant | ester           | 0      | 0      | 0.0076 | 0.016  | 0.0105 | 0      |
| methyl n-methylanthranilate | flavorant | ester           | 0      | 0      | 0.0096 | 0      | 0      | 0      |
| phenylethyl n-butyrate      | flavorant | ester           | 0      | 0      | 0      | 0      | 0      | 0      |
| isobutyl n-butyrate         | flavorant | ester           | 0      | 0      | 0      | 0      | 0      | 0.0078 |
| citronellol acetate         | flavorant | ester           | 0.0159 | 0      | 0.0457 | 0.0092 | 0.0061 | 0.0027 |
| phenylethyl isobutyrate     | flavorant | ester           | 0      | 0      | 0      | 0.0014 | 0      | 0      |
| isopropyl isobutyrate       | flavorant | ester           | 0      | 0      | 0      | 0      | 0      | 0      |
| n-hexyl senecioate          | flavorant | ester           | 0.0209 | 0      | 0.0378 | 0.0399 | 0      | 0.041  |
| isopropyl senecioate        | flavorant | ester           | 0      | 0      | 0      | 0.0331 | 0      | 0.0421 |
| hexanal                     | flavorant | aldehyde        | 0.0102 | 0      | 0      | 0      | 0      | 0.0185 |
| phenylethyl propionate      | flavorant | ester           | 0.0396 | 0      | 0      | 0      | 0      | 0.0136 |
| isobutyl isobutyrate        | flavorant | ester           | 0      | 0      | 0      | 0      | 0      | 0      |
| melonal                     | flavorant | aldehyde        | 0.0035 | 0      | 0      | 0      | 0.0055 | 0      |
| 3-mercaptohexanol           | flavorant | vsc             | 0      | 0      | 0      | 0      | 0      | 0      |
| 6-amyl- $\alpha$ -pyrone    | flavorant | lactone         | 0      | 0      | 0.0098 | 0      | 0      | 0      |
| 3-mercaptohexyl butyrate    | flavorant | vsc             | 0      | 0      | 0      | 0      | 0      | 0      |
| methyl senecioate           | flavorant | ester           | 0      | 0      | 0      | 0      | 0      | 0.0448 |
| skatole                     | flavorant | heterocycle     | 0      | 0      | 0      | 0      | 0      | 0      |
| n-decyl acetate             | flavorant | ester           | 0      | 0      | 0      | 0      | 0      | 0      |

**Table S17.** Analyte Relative-% of volatile fraction (3/5).

| Compound name           | type      | subtype         | Rainbow 2.0 | Fruity Pebbles | OPP x Smarties | Gorilla Glue | Bubba Kush  | Trainwreck | Bacio Gelato |
|-------------------------|-----------|-----------------|-------------|----------------|----------------|--------------|-------------|------------|--------------|
| <b>Exotic score</b>     | <b>NA</b> | <b>NA</b>       | <b>71.6</b> | <b>71.4</b>    | <b>70.9</b>    | <b>65.1</b>  | <b>62.1</b> | 43.7       | <b>43.1</b>  |
| d-limonene              | terpene   | monoterpene     | 34.3789     | 20.718         | 36.9823        | 3.5968       | 23.0339     | 12.2101    | 43.5127      |
| caryophyllene           | terpene   | sesquiterpene   | 10.6575     | 30.8829        | 9.2902         | 42.7991      | 16.812      | 13.0155    | 13.552       |
| $\alpha$ -pinene        | terpene   | monoterpene     | 5.2216      | 0.8815         | 8.9255         | 0.4424       | 3.1268      | 3.1527     | 8.3441       |
| trans- $\beta$ -ocimene | terpene   | monoterpene     | 3.7532      | 0.0718         | 2.118          | 0.1258       | 0.2258      | 4.8512     | 1.8997       |
| humulene                | terpene   | sesquiterpene   | 3.5552      | 8.7273         | 3.1889         | 14.7369      | 5.6122      | 3.4444     | 2.0416       |
| $\beta$ -myrcene        | terpene   | monoterpene     | 9.8372      | 1.4092         | 13.8948        | 4.2307       | 18.9858     | 6.4857     | 2.6034       |
| linalool                | terpene   | monoterpenoid   | 10.9706     | 20.1411        | 7.0167         | 10.9433      | 13.5439     | 4.5234     | 5.1439       |
| endo-fenchol            | terpene   | monoterpenoid   | 3.839       | 2.6546         | 4.4167         | 0.8583       | 3.6677      | 1.5026     | 4.1635       |
| $\alpha$ -terpineol     | terpene   | monoterpenoid   | 2.5345      | 2.1            | 2.77           | 0.7712       | 2.4577      | 1.6744     | 2.6356       |
| $\beta$ -pinene         | terpene   | monoterpene     | 3.2256      | 2.1906         | 3.4377         | 0.9278       | 0.4873      | 5.1007     | 9.1523       |
| (-)-guaiol              | terpene   | sesquiterpenoid | 2.791       | 1.5485         | 0.7865         | 5.0298       | 5.0096      | 0.004      | 0.0099       |
| camphene                | terpene   | monoterpene     | 1.1233      | 0.2987         | 1.7948         | 0.1533       | 1.0114      | 0.1877     | 1.2537       |
| endo-borneol            | terpene   | monoterpenoid   | 1.0664      | 0.5997         | 1.3762         | 0.2533       | 1.0279      | 0.9989     | 0.6216       |
| $\alpha$ -bisabolol     | terpene   | sesquiterpenoid | 1.0812      | 2.461          | 0.3634         | 4.6481       | 2.147       | 0.4995     | 1.536        |
| terpinolene             | terpene   | monoterpene     | 0.4874      | 0.3062         | 0.5381         | 0.0617       | 0.4374      | 1.4305     | 0.4436       |
| n-hexyl hexanoate       | flavorant | ester           | 2.63        | 0.4454         | 1.2694         | 0.7523       | 0.1572      | 25.0386    | 0.0287       |
| trans-nerolidol         | terpene   | sesquiterpenoid | 1.0435      | 1.6612         | 0.1804         | 1.0865       | 0.4668      | 1.1276     | 0.2321       |
| ethyl hexanoate         | flavorant | ester           | 0.0321      | 0.0363         | 0              | 0.0546       | 0           | 0          | 0            |
| $\gamma$ -terpinene     | terpene   | monoterpene     | 0.1706      | 0.0653         | 0.2075         | 0.0718       | 0.1545      | 1.2018     | 0.2587       |
| n-hexyl acetate         | flavorant | ester           | 0.0916      | 0.0563         | 0              | 0.0839       | 0.0402      | 0          | 0            |
| isopulegol              | terpene   | monoterpenoid   | 0.1283      | 0.2718         | 0.0858         | 0.1025       | 0.0318      | 0.5815     | 0.5285       |
| $\alpha$ -terpinene     | terpene   | monoterpene     | 0.1042      | 0.0513         | 0.1506         | 0.0335       | 0.1646      | 1.546      | 0.0708       |
| n-propyl hexanoate      | flavorant | ester           | 0.0363      | 0.032          | 0.0389         | 0.0246       | 0           | 0          | 0.04         |
| 1-octanol               | flavorant | alcohol         | 0.1349      | 0.1688         | 0.0517         | 0.2084       | 0.0585      | 0.0427     | 0.0447       |
| geraniol                | terpene   | monoterpenoid   | 0.1036      | 0.4841         | 0.0619         | 0.0594       | 0.3996      | 0.1856     | 0.4856       |
| ethyl senecioate        | flavorant | ester           | 0.0597      | 0.0978         | 0.0329         | 0.0185       | 0.0411      | 0.0255     | 0.2572       |
| n-butyl senecioate      | flavorant | ester           | 0           | 0              | 0              | 0            | 0.0446      | 0          | 0            |
| indole                  | flavorant | heterocycle     | 0           | 0.0507         | 0.0458         | 0            | 0.038       | 0.0281     | 0            |
| n-propyl senecioate     | flavorant | ester           | 0           | 0.0576         | 0              | 0            | 0           | 0          | 0            |
| trans-sabinene hydrate  | terpene   | monoterpenoid   | 0.037       | 0.0689         | 0.0372         | 0.0282       | 0.0114      | 0.1972     | 0.119        |



|                             |           |                 |        |        |        |        |        |        |        |
|-----------------------------|-----------|-----------------|--------|--------|--------|--------|--------|--------|--------|
| 2-heptanone                 | flavorant | ketone          | 0.064  | 0.0672 | 0.0408 | 0.062  | 0.0612 | 0.0502 | 0.0447 |
| $\alpha$ -citrinal          | terpene   | monoterpenoid   | 0      | 0      | 0.0311 | 0.0303 | 0      | 0      | 0      |
| isoamyl senecioate          | flavorant | ester           | 0.0334 | 0.0408 | 0.0371 | 0      | 0.032  | 0      | 0      |
| nonanal                     | flavorant | aldehyde        | 0.0294 | 0      | 0.0383 | 0.056  | 0.028  | 0      | 0.0296 |
| isoamyl hexanoate           | flavorant | ester           | 0.103  | 0.0137 | 0.1593 | 0.0131 | 0      | 0.0129 | 0      |
| prenylthiol                 | flavorant | vsc             | 0.1175 | 0.7444 | 0.0877 | 0.0309 | 0.0871 | 0.0106 | 0.3718 |
| 3-carene                    | terpene   | monoterpene     | 0.036  | 0.0178 | 0.0512 | 0.0286 | 0.0553 | 7.3713 | 0.0315 |
| methyl anthranilate         | flavorant | ester           | 0.0212 | 0.0289 | 0.0303 | 0.0425 | 0.0406 | 0.0496 | 0.0262 |
| n-octyl acetate             | flavorant | ester           | 0.0472 | 0.0479 | 0.0175 | 0.0732 | 0.0229 | 0.0101 | 0.0087 |
| n-octanal                   | flavorant | aldehyde        | 0      | 0      | 0      | 0      | 0      | 0      | 0      |
| n-hexyl n-butyrate          | flavorant | ester           | 0.1196 | 0.021  | 0.049  | 6.5454 | 0.0174 | 0.6222 | 0.0177 |
| ethyl anthranilate          | flavorant | ester           | 0      | 0.025  | 0      | 0      | 0      | 0      | 0      |
| citronellol                 | terpene   | monoterpenoid   | 0.054  | 0.1468 | 0.1265 | 0.0259 | 0.1458 | 0      | 0.1145 |
| 3-mercaptohexyl acetate     | flavorant | vsc             | 0.0197 | 0      | 0      | 0.0267 | 0      | 0      | 0.0335 |
| cherry propanol             | flavorant | alcohol         | 0.0166 | 0.0178 | 0.0211 | 0.0192 | 0.0159 | 1.2901 | 0.0212 |
| 1-decanol                   | flavorant | alcohol         | 0.0243 | 0.0321 | 0.0197 | 0.0962 | 0.0171 | 0.0356 | 0.0181 |
| sulcatone                   | flavorant | ketone          | 0.0183 | 0.0217 | 0.018  | 0.0255 | 0.0203 | 0.0619 | 0.0192 |
| sabinene                    | terpene   | monoterpene     | 0.0186 | 0.019  | 0.0096 | 0.0266 | 0.0106 | 0.514  | 0.0194 |
| methyl hexanoate            | flavorant | ester           | 0.0183 | 0.0244 | 0.0187 | 0.0283 | 0.0203 | 0.0218 | 0.0187 |
| ethyl isovalerate           | flavorant | ester           | 0      | 0.0157 | 0      | 0      | 0.0143 | 0      | 0.0141 |
| methyl octanoate            | flavorant | ester           | 0      | 0.0004 | 0      | 0.001  | 0      | 0      | 0      |
| ethyl 2-methylbutyrate      | flavorant | ester           | 0.0038 | 0      | 0      | 0      | 0      | 0      | 0.0037 |
| n-propyl n-butyrate         | flavorant | ester           | 0      | 0      | 0      | 0      | 0      | 0      | 0      |
| n-heptyl acetate            | flavorant | ester           | 0.0062 | 0.0071 | 0      | 0.0161 | 0.0056 | 0      | 0.0061 |
| ethyl isobutyrate           | flavorant | ester           | 0.0082 | 0.0069 | 0.0126 | 0      | 0      | 0      | 0      |
| p-cymene                    | terpene   | monoterpene     | 0.0062 | 0.0072 | 0.0097 | 0.0083 | 0.0175 | 0.8136 | 0.0108 |
| cis-nerolidol               | terpene   | sesquiterpenoid | 0.0046 | 0.0066 | 0.0054 | 0.0092 | 0.0045 | 0      | 0      |
| hexyl 2-methylbutyrate      | flavorant | ester           | 0.0056 | 0      | 0.0062 | 0.0699 | 0.0046 | 0.0195 | 0.0059 |
| ethyl n-butyrate            | flavorant | ester           | 0      | 0      | 0      | 0      | 0      | 0      | 0      |
| isobutyl hexanoate          | flavorant | ester           | 0      | 0      | 0      | 0      | 0      | 0      | 0      |
| cis-3-hexenyl n-butyrate    | flavorant | ester           | 0.0111 | 0      | 0.0196 | 0.1399 | 0      | 0.0253 | 0      |
| n-hexyl isobutyrate         | flavorant | ester           | 0.0195 | 0.0203 | 0.0194 | 0.1678 | 0      | 0      | 0      |
| n-heptyl n-butyrate         | flavorant | ester           | 0.0102 | 0      | 0.0108 | 0.1402 | 0.006  | 0.0352 | 0      |
| methyl n-methylanthranilate | flavorant | ester           | 0      | 0      | 0      | 0      | 0.0086 | 0      | 0      |
| phenylethyl n-butyrate      | flavorant | ester           | 0      | 0      | 0      | 0      | 0      | 0      | 0      |
| isobutyl n-butyrate         | flavorant | ester           | 0      | 0      | 0      | 0.01   | 0      | 0      | 0      |
| citronellol acetate         | flavorant | ester           | 0.0054 | 0.0162 | 0.0204 | 0      | 0.0231 | 0      | 0.0051 |
| phenylethyl isobutyrate     | flavorant | ester           | 0      | 0      | 0      | 0.0008 | 0      | 0      | 0      |
| isopropyl isobutyrate       | flavorant | ester           | 0      | 0      | 0      | 0      | 0.0085 | 0      | 0      |
| n-hexyl senecioate          | flavorant | ester           | 0.0333 | 0.0421 | 0.0389 | 0.0453 | 0.0387 | 0      | 0.0351 |
| isopropyl senecioate        | flavorant | ester           | 0.035  | 0.0506 | 0.0389 | 0      | 0.0566 | 0      | 0.0394 |
| hexanal                     | flavorant | aldehyde        | 0.0153 | 0      | 0      | 0.0221 | 0.0177 | 0      | 0      |
| phenylethyl propionate      | flavorant | ester           | 0      | 0      | 0      | 0.0191 | 0      | 0      | 0      |
| isobutyl isobutyrate        | flavorant | ester           | 0      | 0      | 0      | 0      | 0      | 0      | 0      |
| melonal                     | flavorant | aldehyde        | 0      | 0      | 0      | 0      | 0.0059 | 0      | 0      |
| 3-mercaptohexanol           | flavorant | vsc             | 0      | 0      | 0      | 0.0676 | 0      | 0      | 0      |
| 6-amil- $\alpha$ -pyrone    | flavorant | lactone         | 0      | 0.0075 | 0      | 0.0098 | 0      | 0.0050 | 0      |
| 3-mercaptohexyl butyrate    | flavorant | vsc             | 0      | 0      | 0      | 0.0496 | 0      | 0      | 0      |
| methyl senecioate           | flavorant | ester           | 0      | 0      | 0      | 0      | 0.0277 | 0      | 0.0463 |
| skatole                     | flavorant | heterocycle     | 0      | 0.0201 | 0      | 0      | 0      | 0      | 0      |
| n-decyl acetate             | flavorant | ester           | 0      | 0      | 0      | 0      | 0      | 0      | 0      |

**Table S18.** Analyte Relative-% of volatile fraction (4/5).

| Compound name           | type    | subtype       | MAC 1   | Gelato 33 | Kimbo Kush | Lucky Charms | Pie Hoe | MAC 1   |
|-------------------------|---------|---------------|---------|-----------|------------|--------------|---------|---------|
| <b>Exotic score</b>     |         |               | 39.3    | 34.6      | 34         | 30.7         | 25.3    | 39.3    |
| d-limonene              | terpene | monoterpene   | 21.61   | 37.865    | 43.487     | 30.5529      | 20.2043 | 21.61   |
| caryophyllene           | terpene | sesquiterpene | 21.5352 | 18.3354   | 13.4636    | 23.4073      | 22.683  | 21.5352 |
| $\alpha$ -pinene        | terpene | monoterpene   | 4.8425  | 6.8311    | 4.0104     | 1.7604       | 2.0421  | 4.8425  |
| trans- $\beta$ -ocimene | terpene | monoterpene   | 0.9066  | 1.1285    | 0.2528     | 0.0403       | 0.0358  | 0.9066  |
| humulene                | terpene | sesquiterpene | 6.7262  | 3.419     | 3.6722     | 8.9846       | 7.8301  | 6.7262  |

|                             |           |                 |        |        |         |         |         |        |
|-----------------------------|-----------|-----------------|--------|--------|---------|---------|---------|--------|
| β-myrcene                   | terpene   | monoterpene     | 2.713  | 5.762  | 2.3623  | 12.2294 | 20.3253 | 2.713  |
| linalool                    | terpene   | monoterpenoid   | 9.4449 | 6.7697 | 12.0566 | 3.8827  | 13.558  | 9.4449 |
| endo-fenchol                | terpene   | monoterpenoid   | 5.3905 | 3.4009 | 3.2274  | 3.1542  | 2.2533  | 5.3905 |
| α-terpineol                 | terpene   | monoterpenoid   | 4.0897 | 2.2347 | 2.7533  | 2.4752  | 1.7709  | 4.0897 |
| β-pinene                    | terpene   | monoterpene     | 6.5793 | 7.8047 | 7.0872  | 3.2947  | 3.3477  | 6.5793 |
| (-)-guaiol                  | terpene   | sesquiterpenoid | 0.0162 | 0.0078 | 0.0152  | 0.0124  | 0.0116  | 0.0162 |
| camphene                    | terpene   | monoterpene     | 1.0395 | 1.0761 | 1.2317  | 0.5334  | 0.5801  | 1.0395 |
| endo-borneol                | terpene   | monoterpenoid   | 1.0285 | 0.5368 | 0.7057  | 0.8924  | 0.6365  | 1.0285 |
| α-bisabolol                 | terpene   | sesquiterpenoid | 9.6149 | 1.6989 | 2.3292  | 2.0984  | 2.0287  | 9.6149 |
| terpinolene                 | terpene   | monoterpene     | 0.332  | 0.3964 | 0.5618  | 0.2849  | 0.1411  | 0.332  |
| n-hexyl hexanoate           | flavorant | ester           | 0.3951 | 0.1976 | 0.214   | 1.4552  | 0.5657  | 0.3951 |
| trans-nerolidol             | terpene   | sesquiterpenoid | 1.7494 | 0.1867 | 0.6428  | 1.7355  | 0.0362  | 1.7494 |
| ethyl hexanoate             | flavorant | ester           | 0.0466 | 0      | 0.0522  | 0       | 0       | 0.0466 |
| γ-terpinene                 | terpene   | monoterpene     | 0.1513 | 0.2434 | 0.1433  | 0.0483  | 0.059   | 0.1513 |
| n-hexyl acetate             | flavorant | ester           | 0      | 0      | 0       | 0.0546  | 0.0322  | 0      |
| isopulegol                  | terpene   | monoterpenoid   | 0.4448 | 0.4534 | 0.2201  | 0.2338  | 0.2006  | 0.4448 |
| α-terpinene                 | terpene   | monoterpene     | 0.1089 | 0.0669 | 0.1111  | 0.0662  | 0.0779  | 0.1089 |
| n-propyl hexanoate          | flavorant | ester           | 0      | 0.0406 | 0       | 0       | 0.0227  | 0      |
| 1-octanol                   | flavorant | alcohol         | 0.0635 | 0.0455 | 0.0474  | 0.5121  | 0.1335  | 0.0635 |
| geraniol                    | terpene   | monoterpenoid   | 0.0485 | 0.3472 | 0.307   | 1.3384  | 0.4192  | 0.0485 |
| ethyl senecioate            | flavorant | ester           | 0.031  | 0.1903 | 0.015   | 0.0114  | 0.0479  | 0.031  |
| n-butyl senecioate          | flavorant | ester           | 0.0744 | 0      | 0.0598  | 0.0444  | 0.0487  | 0.0744 |
| indole                      | flavorant | heterocycle     | 0.0654 | 0      | 0.0601  | 0.0413  | 0.0451  | 0.0654 |
| n-propyl senecioate         | flavorant | ester           | 0      | 0      | 0       | 0       | 0       | 0      |
| trans-sabinene hydrate      | terpene   | monoterpenoid   | 0.1459 | 0.0983 | 0.0828  | 0.0632  | 0.0646  | 0.1459 |
| 2-heptanone                 | flavorant | ketone          | 0.0466 | 0.0654 | 0.0601  | 0.0427  | 0.0424  | 0.0466 |
| α-citral                    | terpene   | monoterpenoid   | 0      | 0.0501 | 0.0383  | 0       | 0.0193  | 0      |
| isoamyl senecioate          | flavorant | ester           | 0.0531 | 0      | 0       | 0.0316  | 0.0348  | 0.0531 |
| nonanal                     | flavorant | aldehyde        | 0.0924 | 0.034  | 0.0373  | 0.0254  | 0       | 0.0924 |
| isoamyl hexanoate           | flavorant | ester           | 0.0357 | 0      | 0       | 0.0178  | 0       | 0.0357 |
| prenylthiol                 | flavorant | vsc             | 0.0463 | 0.2803 | 0.076   | 0.1078  | 0.1499  | 0.0463 |
| 3-carene                    | terpene   | monoterpene     | 0.0396 | 0.0411 | 0.0396  | 0.0365  | 0.0474  | 0.0396 |
| methyl anthranilate         | flavorant | ester           | 0.0447 | 0.028  | 0.0366  | 0.017   | 0.0203  | 0.0447 |
| n-octyl acetate             | flavorant | ester           | 0.0133 | 0.0076 | 0.0107  | 0.1794  | 0.0497  | 0.0133 |
| n-octanal                   | flavorant | aldehyde        | 0      | 0      | 0       | 0       | 0       | 0      |
| n-hexyl n-butyrate          | flavorant | ester           | 0.0298 | 0.0191 | 0.028   | 0.0864  | 0.0195  | 0.0298 |
| ethyl anthranilate          | flavorant | ester           | 0      | 0      | 0       | 0       | 0       | 0      |
| citronellol                 | terpene   | monoterpenoid   | 0.1098 | 0.1027 | 0.2035  | 0.0315  | 0.1379  | 0.1098 |
| 3-mercaptohexyl acetate     | flavorant | vsc             | 0      | 0      | 0       | 0.024   | 0       | 0      |
| cherry propanol             | flavorant | alcohol         | 0.0296 | 0.018  | 0.0232  | 0.0301  | 0.0324  | 0.0296 |
| 1-decanol                   | flavorant | alcohol         | 0.026  | 0.0183 | 0       | 0.0663  | 0.0263  | 0.026  |
| sulcatone                   | flavorant | ketone          | 0.0359 | 0.0182 | 0.0339  | 0       | 0       | 0.0359 |
| sabinene                    | terpene   | monoterpene     | 0.0482 | 0.02   | 0.0237  | 0.013   | 0.0177  | 0.0482 |
| methyl hexanoate            | flavorant | ester           | 0.0303 | 0.0224 | 0.0235  | 0.018   | 0.019   | 0.0303 |
| ethyl isovalerate           | flavorant | ester           | 0      | 0      | 0.0216  | 0       | 0.0134  | 0      |
| methyl octanoate            | flavorant | ester           | 0      | 0      | 0       | 0       | 0       | 0      |
| ethyl 2-methylbutyrate      | flavorant | ester           | 0      | 0      | 0.025   | 0       | 0       | 0      |
| n-propyl n-butyrate         | flavorant | ester           | 0      | 0      | 0.0128  | 0       | 0       | 0      |
| n-heptyl acetate            | flavorant | ester           | 0      | 0      | 0       | 0.0071  | 0.0054  | 0      |
| ethyl isobutyrate           | flavorant | ester           | 0      | 0      | 0       | 0       | 0.0051  | 0      |
| p-cymene                    | terpene   | monoterpene     | 0.0152 | 0      | 0.0118  | 0.0256  | 0.03    | 0.0152 |
| cis-nerolidol               | terpene   | sesquiterpenoid | 0.0139 | 0      | 0.0057  | 0       | 0       | 0.0139 |
| hexyl 2-methylbutyrate      | flavorant | ester           | 0.0078 | 0      | 0       | 0.0079  | 0       | 0.0078 |
| ethyl n-butyrate            | flavorant | ester           | 0      | 0      | 0.0531  | 0       | 0       | 0      |
| isobutyl hexanoate          | flavorant | ester           | 0      | 0      | 0       | 0       | 0       | 0      |
| cis-3-hexenyl n-butyrate    | flavorant | ester           | 0      | 0      | 0       | 0       | 0       | 0      |
| n-hexyl isobutyrate         | flavorant | ester           | 0      | 0      | 0       | 0       | 0       | 0      |
| n-heptyl n-butyrate         | flavorant | ester           | 0      | 0      | 0       | 0       | 0       | 0      |
| methyl n-methylanthranilate | flavorant | ester           | 0      | 0      | 0       | 0       | 0       | 0      |
| phenylethyl n-butyrate      | flavorant | ester           | 0.0115 | 0      | 0       | 0       | 0       | 0.0115 |
| isobutyl n-butyrate         | flavorant | ester           | 0      | 0      | 0       | 0       | 0       | 0      |
| citronellol acetate         | flavorant | ester           | 0.023  | 0.0045 | 0.0131  | 0.0047  | 0.021   | 0.023  |
| phenylethyl isobutyrate     | flavorant | ester           | 0      | 0      | 0       | 0       | 0       | 0      |

|                          |           |             |        |        |        |        |        |        |
|--------------------------|-----------|-------------|--------|--------|--------|--------|--------|--------|
| isopropyl isobutyrate    | flavorant | ester       | 0      | 0      | 0      | 0      | 0      | 0      |
| n-hexyl senecioate       | flavorant | ester       | 0      | 0.0362 | 0      | 0      | 0.0369 | 0      |
| isopropyl senecioate     | flavorant | ester       | 0      | 0.0394 | 0      | 0      | 0.0394 | 0      |
| hexanal                  | flavorant | aldehyde    | 0.0248 | 0      | 0.0218 | 0      | 0      | 0.0248 |
| phenylethyl propionate   | flavorant | ester       | 0.0186 | 0      | 0      | 0.0138 | 0      | 0.0186 |
| isobutyl isobutyrate     | flavorant | ester       | 0      | 0      | 0      | 0      | 0      | 0      |
| melonal                  | flavorant | aldehyde    | 0.0101 | 0      | 0.008  | 0.0058 | 0      | 0.0101 |
| 3-mercaptohexanol        | flavorant | vsc         | 0      | 0      | 0      | 0      | 0      | 0      |
| 6-amil- $\alpha$ -pyrone | flavorant | lactone     | 0.0075 | 0      | 0      | 0      | 0      | 0      |
| 3-mercaptohexyl butyrate | flavorant | vsc         | 0      | 0      | 0      | 0      | 0      | 0      |
| methyl senecioate        | flavorant | ester       | 0      | 0.0396 | 0      | 0      | 0.0301 | 0      |
| skatole                  | flavorant | heterocycle | 0      | 0      | 0      | 0      | 0      | 0      |
| n-decyl acetate          | flavorant | ester       | 0      | 0      | 0      | 0      | 0      | 0      |

**Table S19.** Analyte Relative-% of volatile fraction (5/5).

| Compound name           | type      | subtype         | Cookies and Cream | GMO Cookies | OG      | 710 chem | GMO     | Cookies and Cream |
|-------------------------|-----------|-----------------|-------------------|-------------|---------|----------|---------|-------------------|
| <b>Exotic score</b>     |           |                 | 15.4              | 5.7         | 3       | 1.9      | 1.7     | 15.4              |
| d-limonene              | terpene   | monoterpene     | 21.5036           | 24.8209     | 24.4908 | 20.1589  | 29.3007 | 21.5036           |
| caryophyllene           | terpene   | sesquiterpene   | 41.5605           | 29.424      | 19.5946 | 43.0426  | 17.9806 | 41.5605           |
| $\alpha$ -pinene        | terpene   | monoterpene     | 2.2246            | 3.0221      | 2.0443  | 1.5085   | 2.1678  | 2.2246            |
| trans- $\beta$ -ocimene | terpene   | monoterpene     | 0.0576            | 0.0462      | 0.0564  | 0.0562   | 0.0631  | 0.0576            |
| humulene                | terpene   | sesquiterpene   | 13.3704           | 13.554      | 6.5222  | 11.1611  | 8.3828  | 13.3704           |
| $\beta$ -myrcene        | terpene   | monoterpene     | 5.8242            | 11.3533     | 18.0528 | 9.7584   | 22.4114 | 5.8242            |
| linalool                | terpene   | monoterpenoid   | 3.9858            | 3.2301      | 11.7246 | 0.042    | 3.8951  | 3.9858            |
| endo-fenchol            | terpene   | monoterpenoid   | 1.6071            | 2.6289      | 3.6236  | 2.5714   | 2.5936  | 1.6071            |
| $\alpha$ -terpineol     | terpene   | monoterpenoid   | 1.1996            | 1.4356      | 3.2807  | 1.7754   | 1.9927  | 1.1996            |
| $\beta$ -pinene         | terpene   | monoterpene     | 4.119             | 1.6272      | 4.3316  | 2.991    | 3.7193  | 4.119             |
| (-)-guaiaol             | terpene   | sesquiterpenoid | 0.0174            | 0.0278      | 0.0132  | 0.0198   | 0.0132  | 0.0174            |
| camphene                | terpene   | monoterpene     | 0.6655            | 0.689       | 0.639   | 0.4529   | 0.6089  | 0.6655            |
| endo-borneol            | terpene   | monoterpenoid   | 0.4494            | 0.6347      | 0.9596  | 0.5867   | 0.6849  | 0.4494            |
| $\alpha$ -bisabolol     | terpene   | sesquiterpenoid | 0.914             | 4.915       | 1.3397  | 1.8899   | 2.574   | 0.914             |
| terpinolene             | terpene   | monoterpene     | 0.2299            | 0.4503      | 0.3081  | 0.2752   | 0.3194  | 0.2299            |
| n-hexyl hexanoate       | flavorant | ester           | 0.1174            | 0.3316      | 1.0639  | 0.6866   | 0.9566  | 0.1174            |
| trans-nerolidol         | terpene   | sesquiterpenoid | 0.6837            | 0.6473      | 0       | 1.4578   | 0.9205  | 0.6837            |
| ethyl hexanoate         | flavorant | ester           | 0                 | 0           | 0.0245  | 0        | 0       | 0                 |
| $\gamma$ -terpinene     | terpene   | monoterpene     | 0.058             | 0.1585      | 0.0567  | 0.0435   | 0.1683  | 0.058             |
| n-hexyl acetate         | flavorant | ester           | 0                 | 0.0301      | 0.0253  | 0        | 0.0303  | 0                 |
| isopulegol              | terpene   | monoterpenoid   | 0.2099            | 0.0349      | 0.5578  | 0.349    | 0.2207  | 0.2099            |
| $\alpha$ -terpinene     | terpene   | monoterpene     | 0.0568            | 0.1428      | 0.0625  | 0.0613   | 0.1124  | 0.0568            |
| n-propyl hexanoate      | flavorant | ester           | 0                 | 0.0291      | 0       | 0.0288   | 0.0296  | 0                 |
| 1-octanol               | flavorant | alcohol         | 0.041             | 0.0355      | 0.0424  | 0.0418   | 0.0377  | 0.041             |
| geraniol                | terpene   | monoterpenoid   | 0.042             | 0.0497      | 0.3422  | 0.1669   | 0.0405  | 0.042             |
| ethyl senecioate        | flavorant | ester           | 0.2558            | 0.0958      | 0       | 0.0331   | 0.0205  | 0.2558            |
| n-butyl senecioate      | flavorant | ester           | 0                 | 0           | 0       | 0.0527   | 0.0471  | 0                 |
| indole                  | flavorant | heterocycle     | 0.0384            | 0.031       | 0.0314  | 0.0507   | 0       | 0.0384            |
| n-propyl senecioate     | flavorant | ester           | 0.048             | 0           | 0       | 0        | 0       | 0.048             |
| trans-sabinene hydrate  | terpene   | monoterpenoid   | 0.0913            | 0.0154      | 0.0975  | 0.0606   | 0.0523  | 0.0913            |
| 2-heptanone             | flavorant | ketone          | 0.0323            | 0.0279      | 0.0271  | 0.0413   | 0.0404  | 0.0323            |
| $\alpha$ -citral        | terpene   | monoterpenoid   | 0.0326            | 0           | 0       | 0        | 0       | 0.0326            |
| isoamyl senecioate      | flavorant | ester           | 0.033             | 0.0279      | 0       | 0.0359   | 0.0335  | 0.033             |
| nonanal                 | flavorant | aldehyde        | 0.0526            | 0           | 0       | 0.0297   | 0       | 0.0526            |
| isoamyl hexanoate       | flavorant | ester           | 0                 | 0           | 0.0443  | 0.1741   | 0.0113  | 0                 |
| prenylthiol             | flavorant | vsc             | 0.0629            | 0.093       | 0.0688  | 0.1884   | 0.1832  | 0.0629            |
| 3-carene                | terpene   | monoterpene     | 0.0262            | 0.0364      | 0.0349  | 0.0317   | 0.0473  | 0.0262            |
| methyl anthranilate     | flavorant | ester           | 0.024             | 0.017       | 0       | 0        | 0.0179  | 0.024             |
| n-octyl acetate         | flavorant | ester           | 0.01              | 0.0077      | 0.0099  | 0.0127   | 0       | 0.01              |
| n-octanal               | flavorant | aldehyde        | 0.0199            | 0           | 0       | 0        | 0       | 0.0199            |
| n-hexyl n-butyrate      | flavorant | ester           | 0.0142            | 0.0095      | 0.0198  | 0.0271   | 0.0432  | 0.0142            |
| ethyl anthranilate      | flavorant | ester           | 0                 | 0           | 0       | 0        | 0       | 0                 |
| citronellol             | flavorant | alcohol         | 0.0361            | 0.0513      | 0.3351  | 0.0305   | 0.029   | 0.0361            |
| 3-mercaptohexyl acetate | flavorant | vsc             | 0                 | 0           | 0       | 0        | 0       | 0                 |
| cherry propanol         | flavorant | alcohol         | 0.0193            | 0.0152      | 0.0173  | 0.0154   | 0.022   | 0.0193            |

|                             |           |                 |        |        |        |        |        |        |
|-----------------------------|-----------|-----------------|--------|--------|--------|--------|--------|--------|
| 1-decanol                   | flavorant | alcohol         | 0.0152 | 0.0128 | 0.0153 | 0      | 0      | 0.0152 |
| sulcatone                   | flavorant | ketone          | 0.0271 | 0.0137 | 0.0126 | 0      | 0      | 0.0271 |
| sabinene                    | terpene   | monoterpene     | 0.0179 | 0.0113 | 0.0205 | 0.0166 | 0.0145 | 0.0179 |
| methyl hexanoate            | flavorant | ester           | 0.0188 | 0      | 0.0139 | 0.0227 | 0.0163 | 0.0188 |
| ethyl isovalerate           | flavorant | ester           | 0.0132 | 0      | 0      | 0.0132 | 0      | 0.0132 |
| methyl octanoate            | flavorant | ester           | 0.002  | 0.0032 | 0      | 0      | 0      | 0.002  |
| ethyl 2-methylbutyrate      | flavorant | ester           | 0.0031 | 0      | 0      | 0      | 0      | 0.0031 |
| n-propyl n-butyrate         | flavorant | ester           | 0      | 0      | 0      | 0      | 0      | 0      |
| n-heptyl acetate            | flavorant | ester           | 0      | 0      | 0.0042 | 0      | 0      | 0      |
| ethyl isobutyrate           | flavorant | ester           | 0      | 0      | 0      | 0      | 0.0028 | 0      |
| p-cymene                    | terpene   | monoterpene     | 0.0081 | 0.1005 | 0.0048 | 0.0056 | 0.0205 | 0.0081 |
| cis-nerolidol               | terpene   | sesquiterpenoid | 0.0134 | 0.008  | 0.0038 | 0      | 0      | 0.0134 |
| hexyl 2-methylbutyrate      | flavorant | ester           | 0.0049 | 0.0046 | 0.0057 | 0.0064 | 0.0052 | 0.0049 |
| ethyl n-butyrate            | flavorant | ester           | 0      | 0      | 0      | 0      | 0      | 0      |
| isobutyl hexanoate          | flavorant | ester           | 0      | 0      | 0      | 0      | 0      | 0      |
| cis-3-hexenyl n-butyrate    | flavorant | ester           | 0      | 0      | 0      | 0      | 0      | 0      |
| n-hexyl isobutyrate         | flavorant | ester           | 0      | 0      | 0.0148 | 0      | 0.0203 | 0      |
| n-heptyl n-butyrate         | flavorant | ester           | 0      | 0      | 0      | 0      | 0      | 0      |
| methyl n-methylanthranilate | flavorant | ester           | 0      | 0      | 0      | 0      | 0      | 0      |
| phenylethyl n-butyrate      | flavorant | ester           | 0      | 0      | 0      | 0      | 0      | 0      |
| isobutyl n-butyrate         | flavorant | ester           | 0      | 0      | 0      | 0      | 0      | 0      |
| citronellol acetate         | flavorant | ester           | 0.0061 | 0.0075 | 0.0463 | 0.002  | 0.0088 | 0.0061 |
| phenylethyl isobutyrate     | flavorant | ester           | 0      | 0      | 0      | 0      | 0      | 0      |
| isopropyl isobutyrate       | flavorant | ester           | 0      | 0      | 0      | 0      | 0      | 0      |
| n-hexyl senecioate          | flavorant | ester           | 0.0325 | 0.0368 | 0      | 0      | 0.035  | 0.0325 |
| isopropyl senecioate        | flavorant | ester           | 0.0355 | 0      | 0      | 0      | 0.0364 | 0.0355 |
| hexanal                     | flavorant | aldehyde        | 0.0182 | 0      | 0.0155 | 0      | 0      | 0.0182 |
| phenylethyl propionate      | flavorant | ester           | 0      | 0      | 0      | 0      | 0      | 0      |
| isobutyl isobutyrate        | flavorant | ester           | 0      | 0      | 0      | 0      | 0      | 0      |
| melonal                     | flavorant | aldehyde        | 0.0067 | 0      | 0      | 0.0065 | 0.0061 | 0.0067 |
| 3-mercaptohexanol           | flavorant | vsc             | 0      | 0      | 0      | 0      | 0      | 0      |
| 6-amil- $\alpha$ -pyrone    | flavorant | lactone         | 0.0038 | 0      | 0      | 0      | 0      | 0      |
| 3-mercaptohexyl butyrate    | flavorant | vsc             | 0      | 0      | 0      | 0      | 0      | 0      |
| methyl senecioate           | flavorant | ester           | 0.0278 | 0.0253 | 0      | 0      | 0.04   | 0.0278 |
| skatole                     | flavorant | heterocycle     | 0      | 0.0136 | 0      | 0.0178 | 0.0223 | 0      |
| n-decyl acetate             | flavorant | ester           | 0      | 0.0044 | 0      | 0      | 0      | 0      |

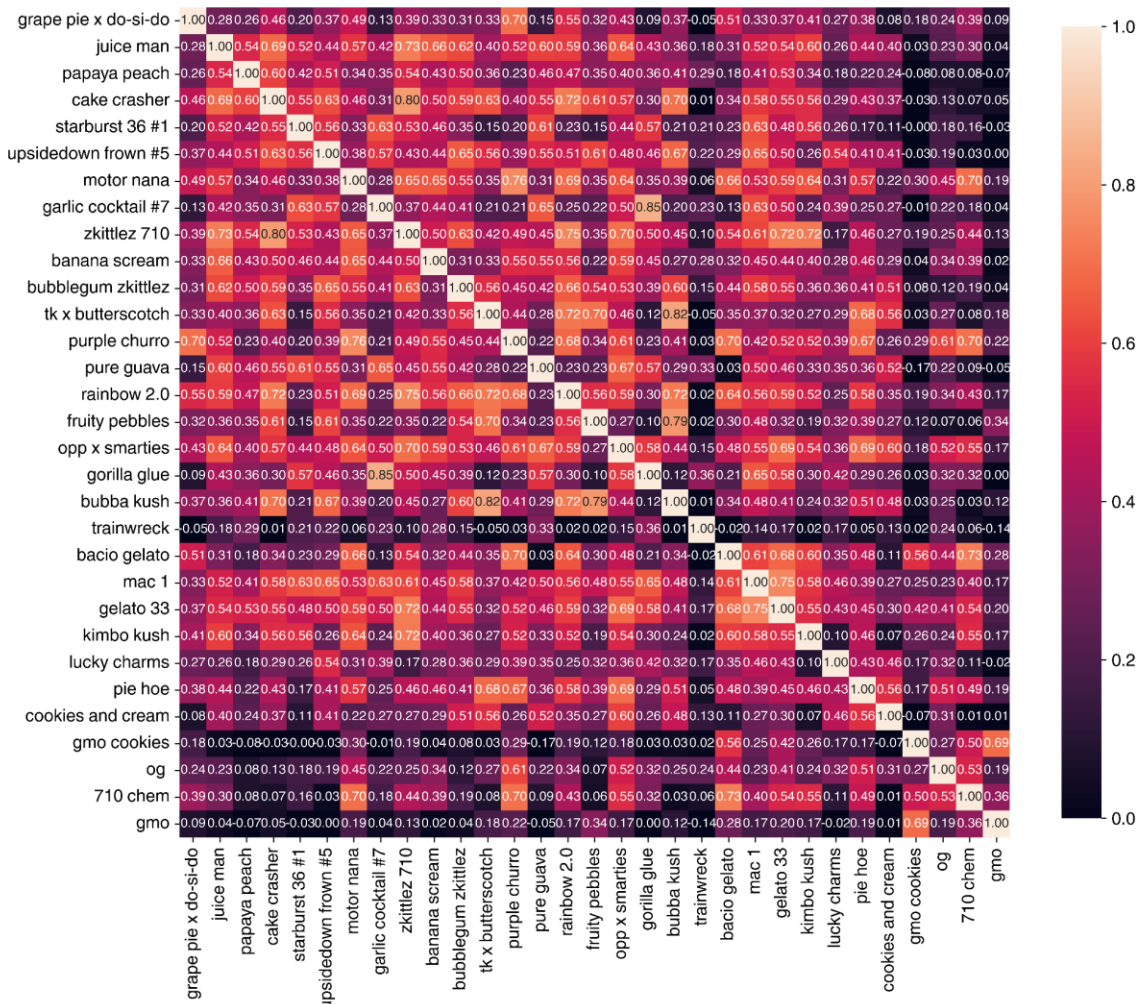

Figure S1. Pearson Correlation matrix showing relationship between sensory results of each variety measured. Higher values indicate greater aromatic similarity between varieties.

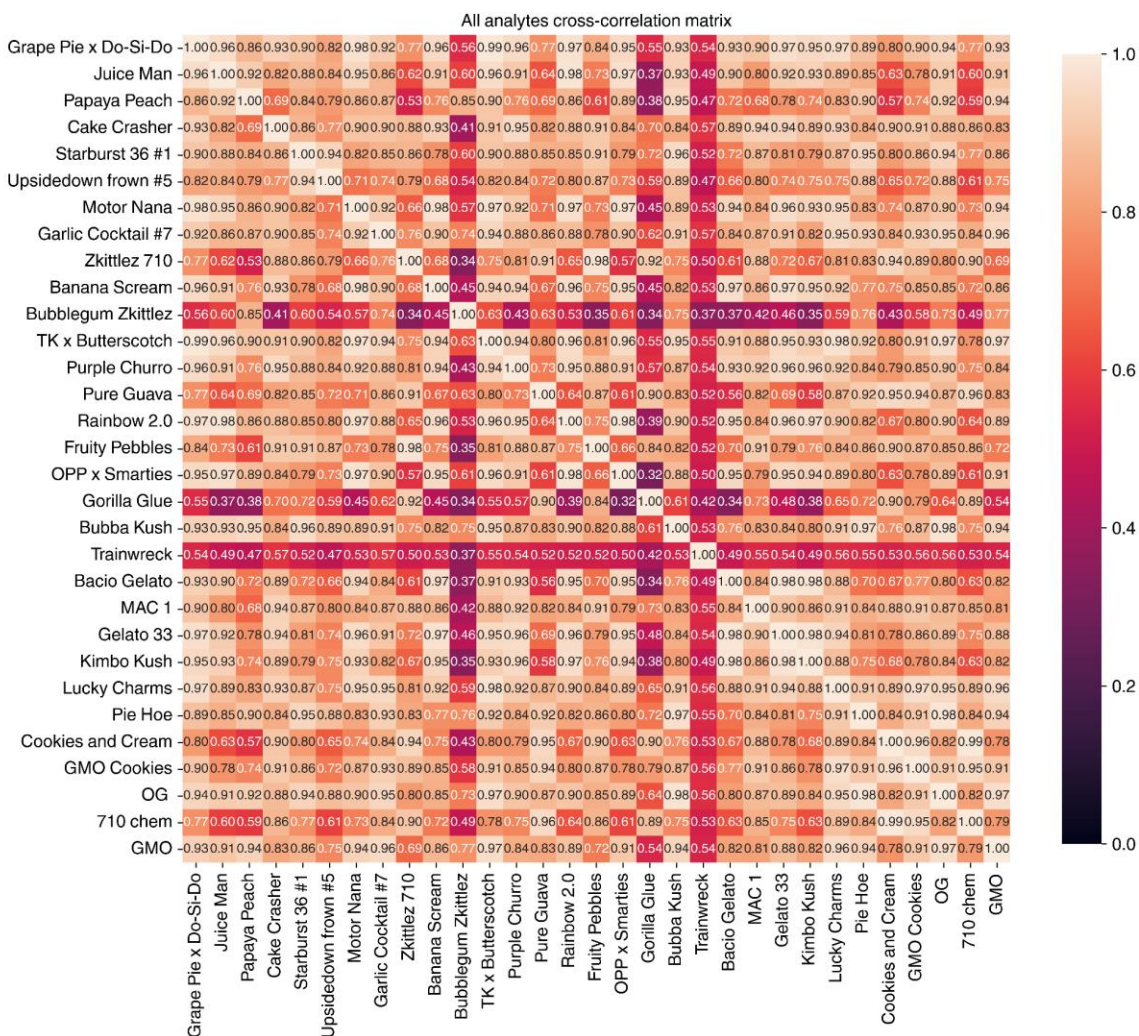

Figure S2. Pearson Correlation matrix showing relationship between each variety measured for all analytes. Higher values indicate greater chemical similarity between varieties.



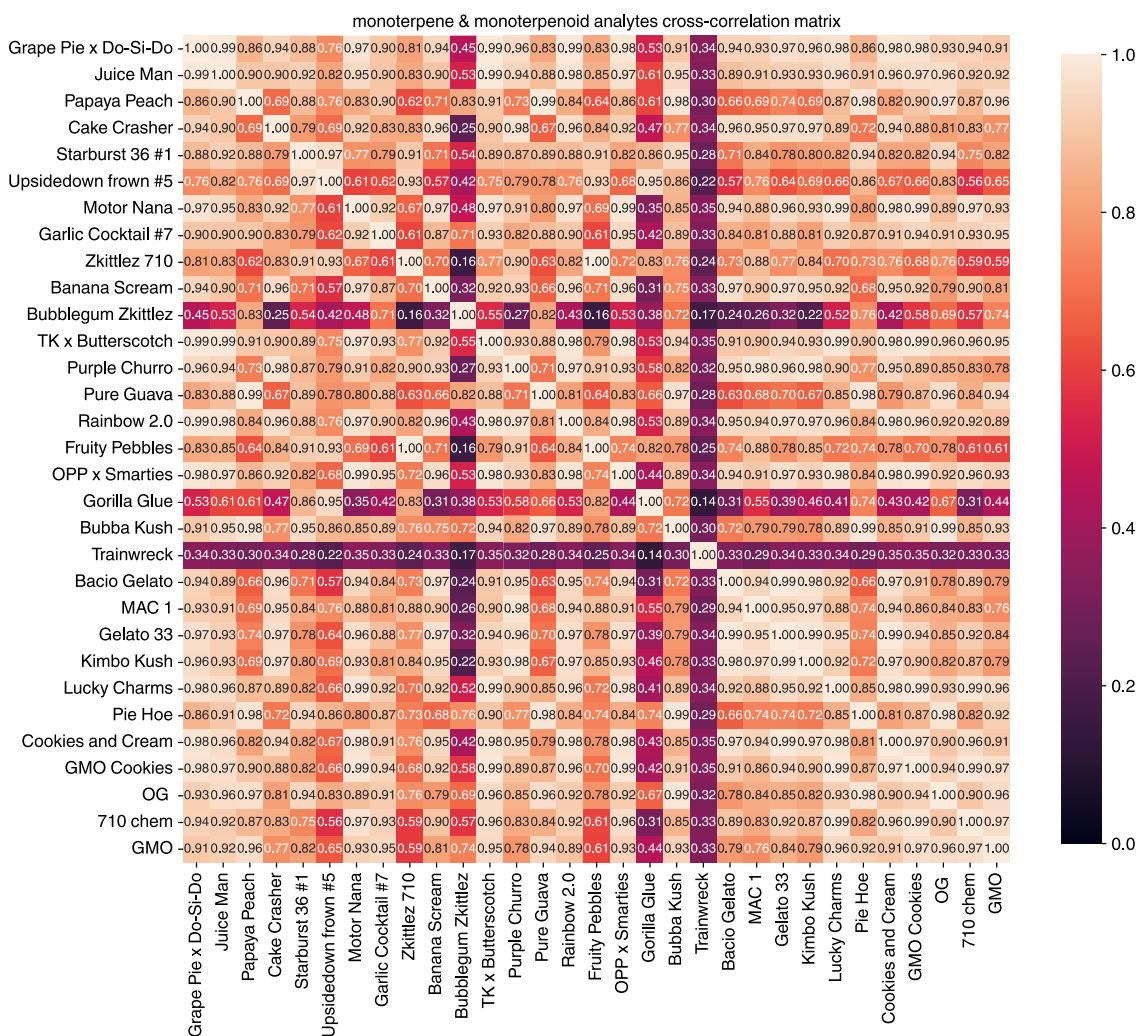

Figure S3. Pearson Correlation matrix showing relationship between each variety measured for monoterpene and monoterpeneoids. Higher values indicate greater chemical similarity between varieties.

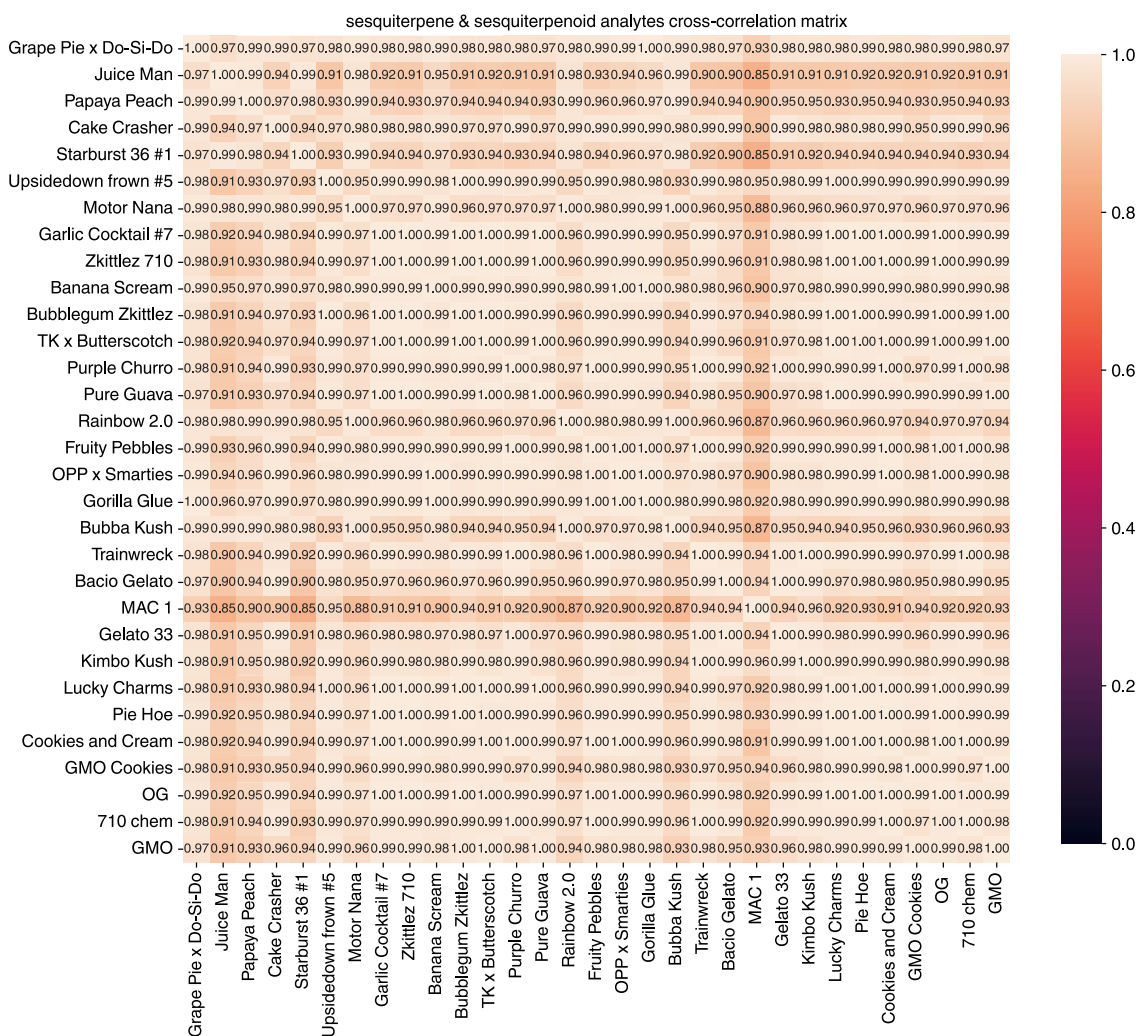

**Figure S4.** Pearson Correlation matrix showing relationship between each variety measured for sesquiterpene and sesquiterpenoids. Higher values indicate greater chemical similarity between varieties.



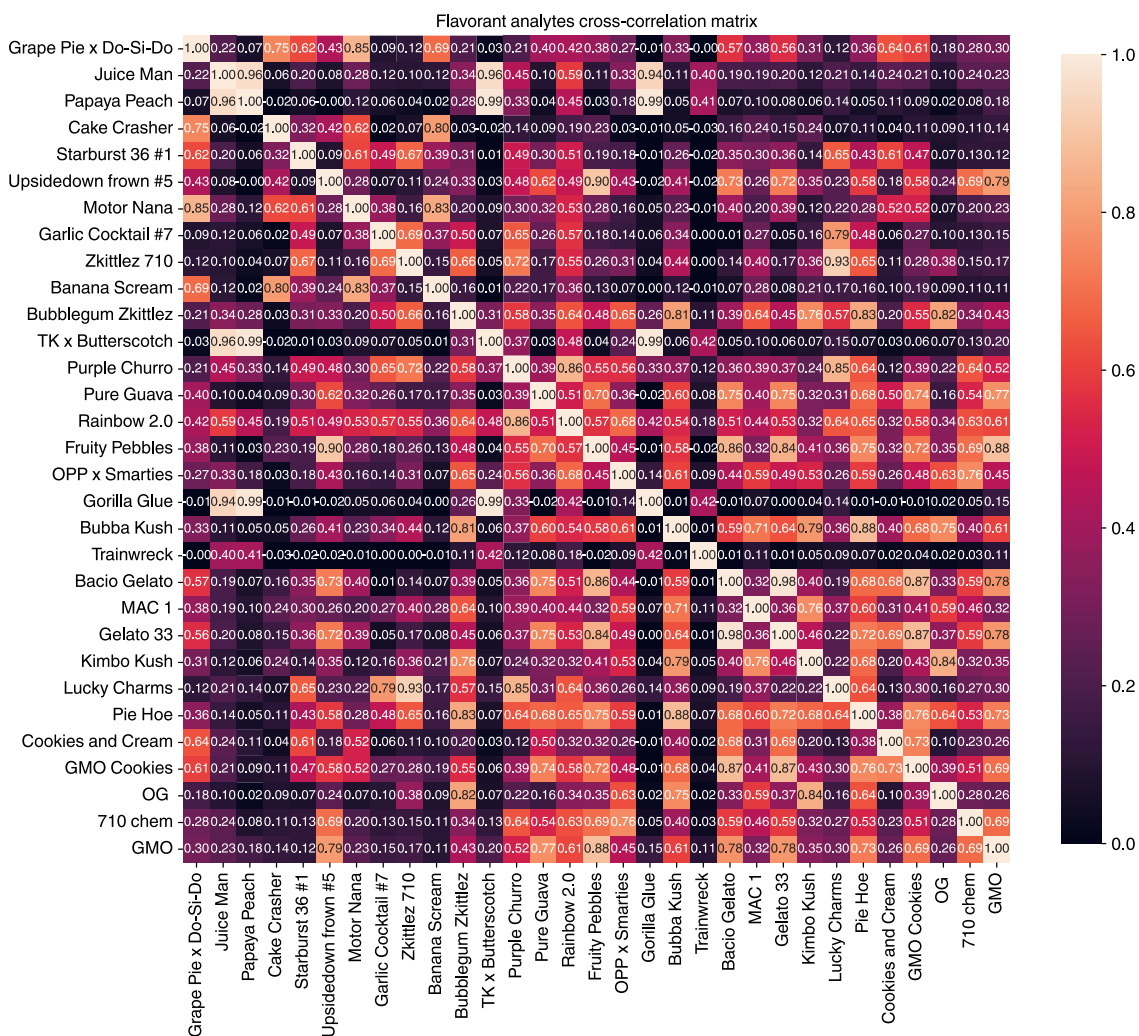

Figure S5. Pearson Correlation matrix showing relationship between each variety measured for flavorants excluding *n*-hexyl hexanoate. Higher values indicate greater chemical similarity between varieties.

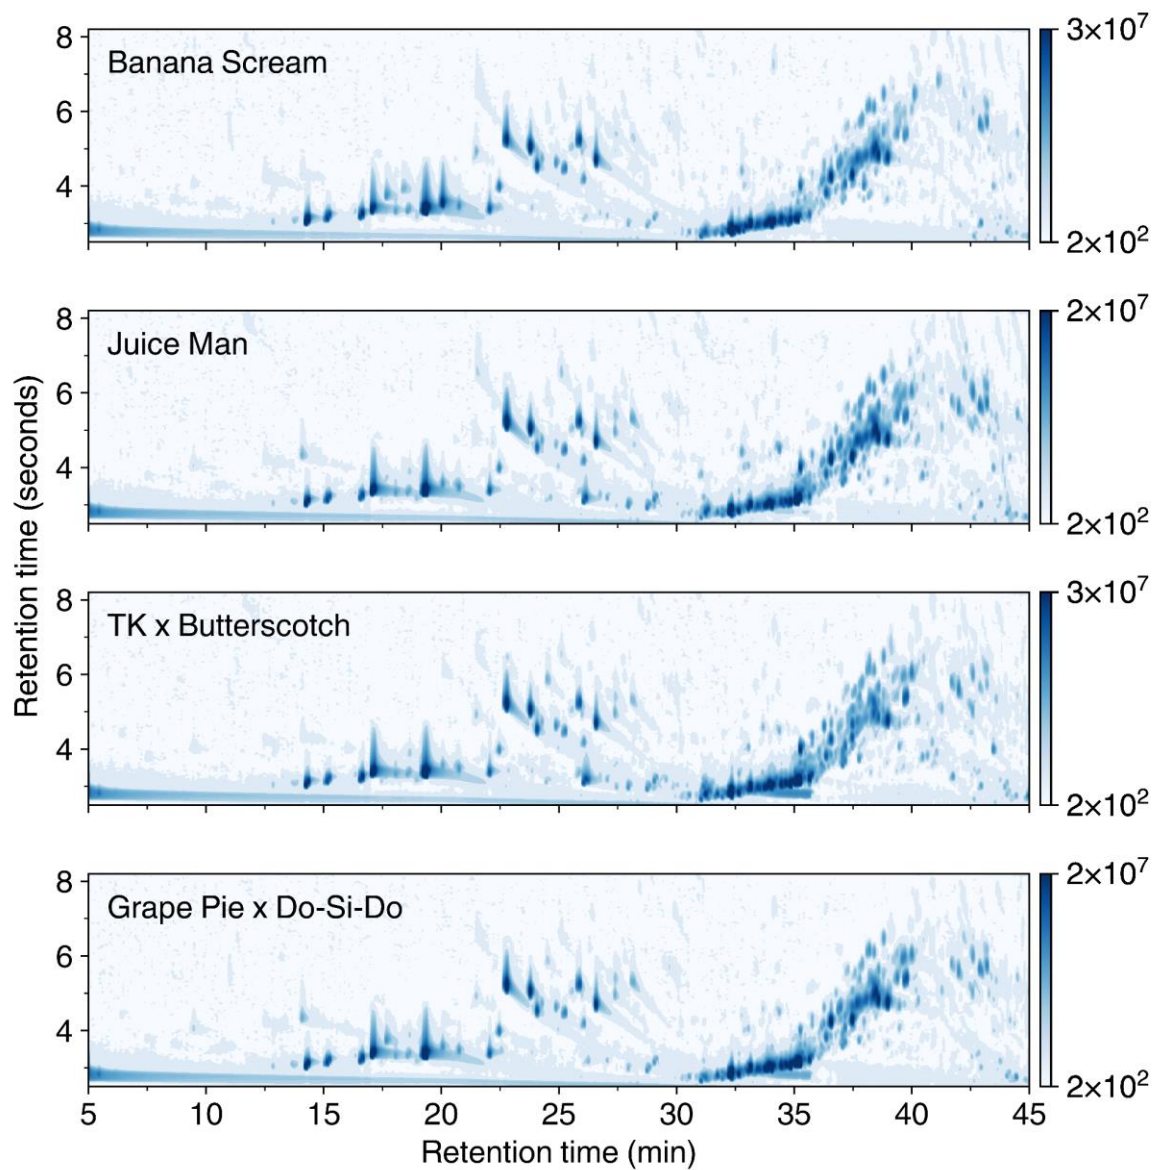

**Figure S6.** GCxGC-FID 2-Dimensional chromatograms for Banana Scream, Juice Man, TK x Butterscotch, and Grape Pie x Do-Si-Do.

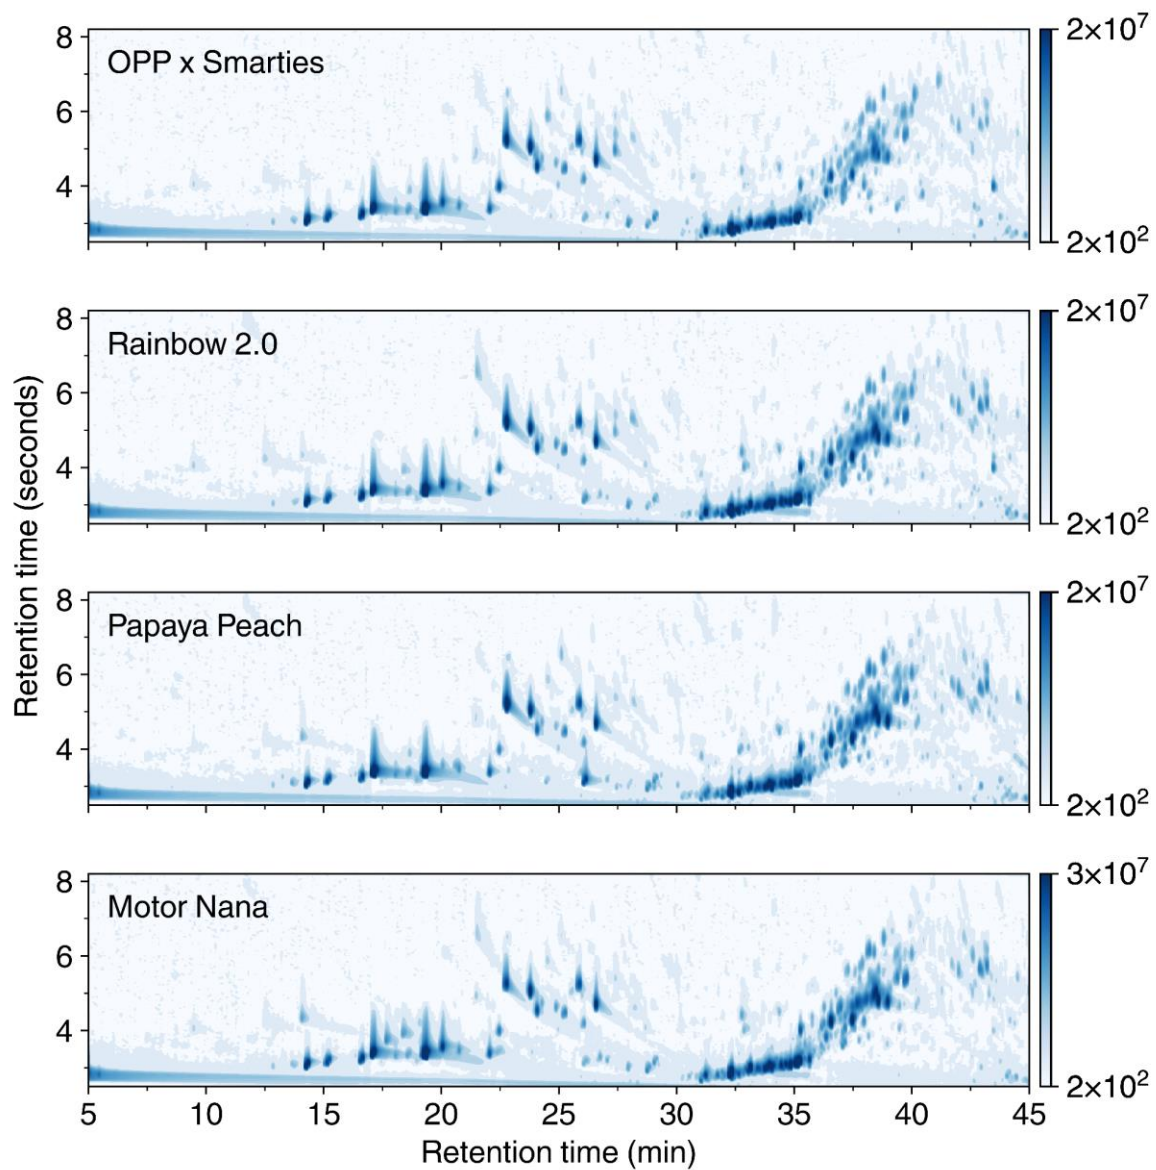

**Figure S7.** GCxGC-FID 2-Dimensional chromatograms for OPP x Smarties, Rainbow 2.0, Papaya Peach, and Motor Nana.

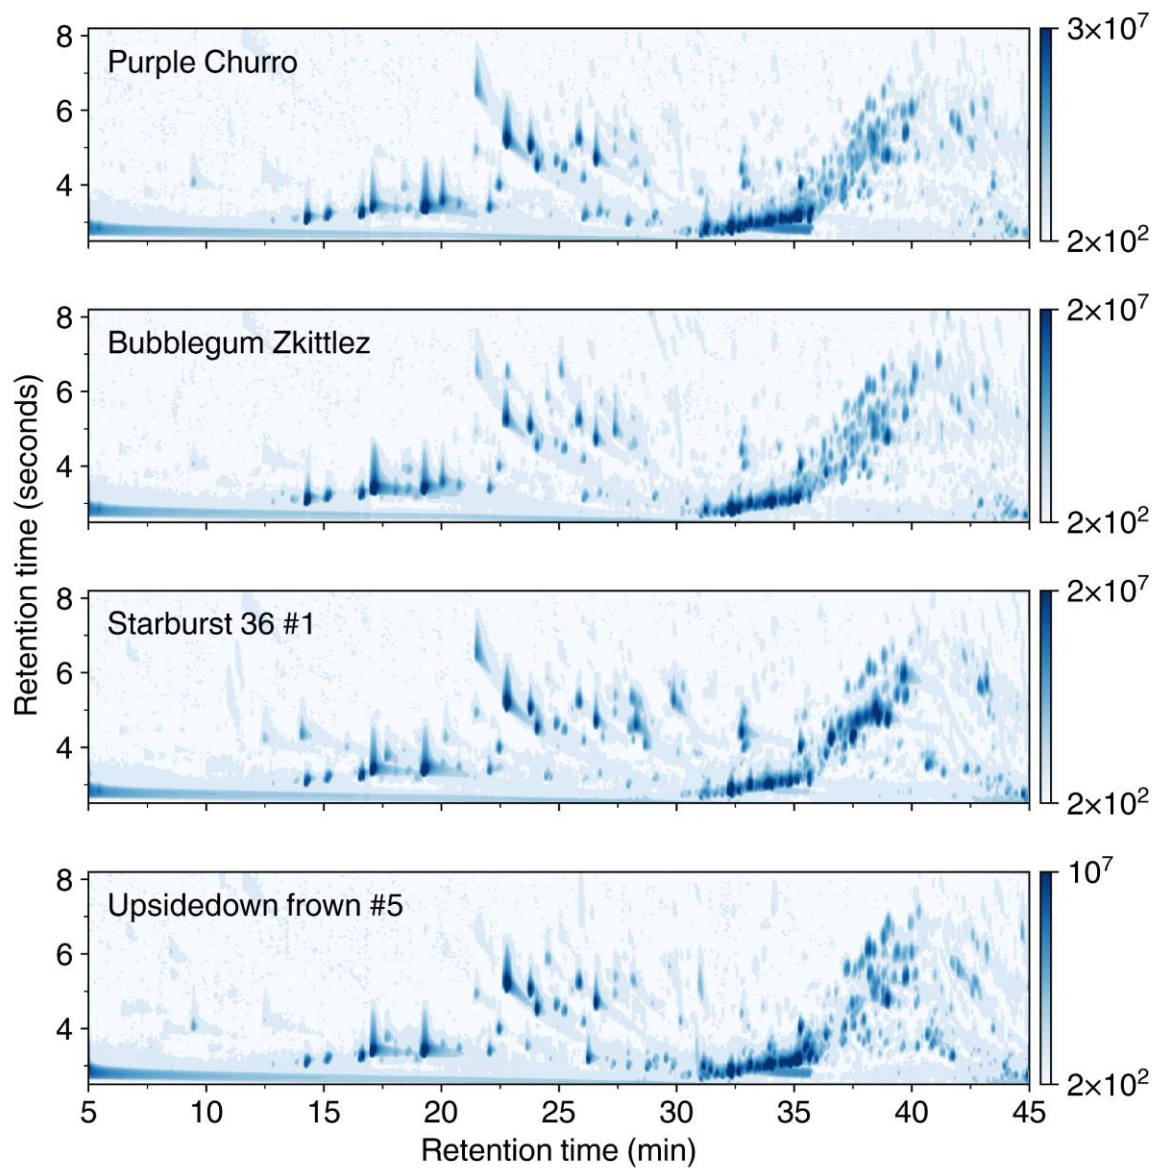

**Figure S8.** GCxGC-FID 2-Dimensional chromatograms for Purple Churro, Bubblegum Zkittlez, Starburst 36 #1, and Upsidedown frown #5.



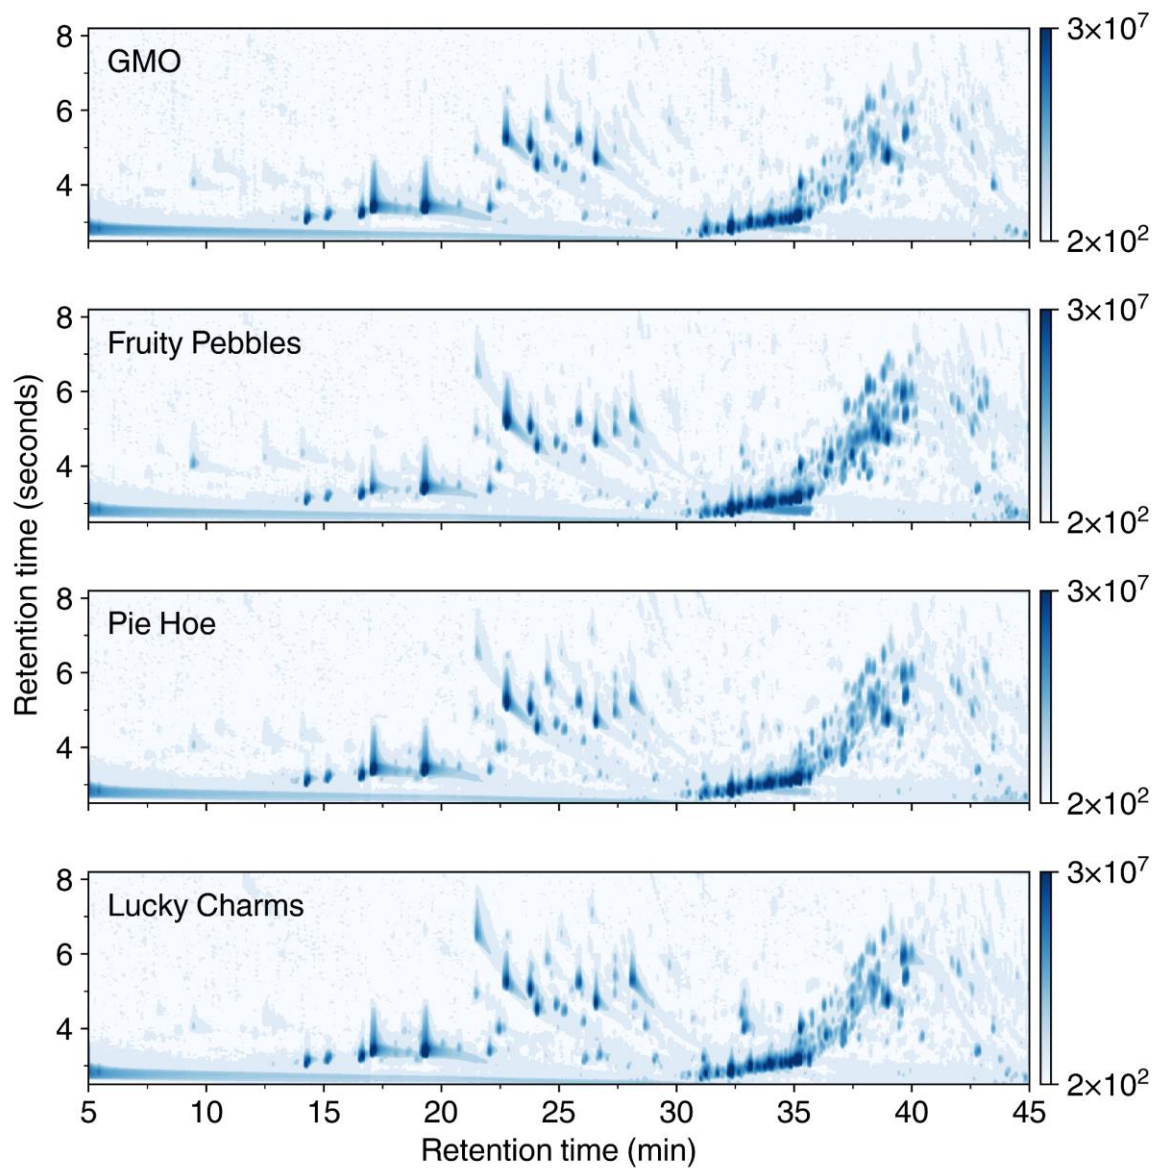

**Figure S9.** GCxGC-FID 2-Dimensional chromatograms for GMO, Fruity Pebbles, Pie Hoe, and Lucky Charms.

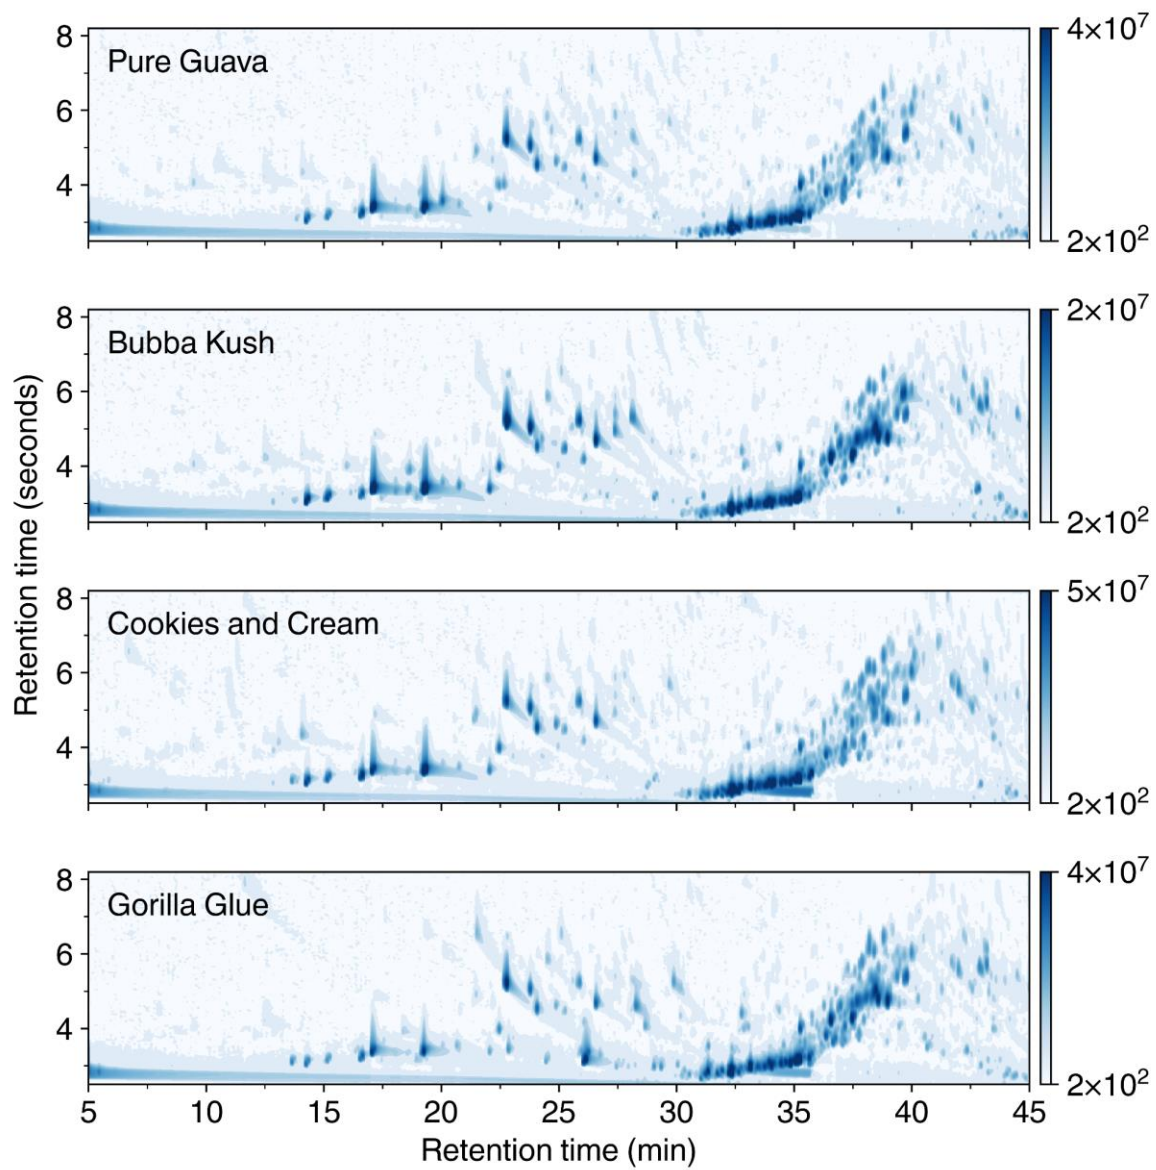

**Figure S10.** GCxGC-FID 2-Dimensional chromatograms for Pure Guava, Bubba Kush, Cookies and Cream, and Gorilla Glue.

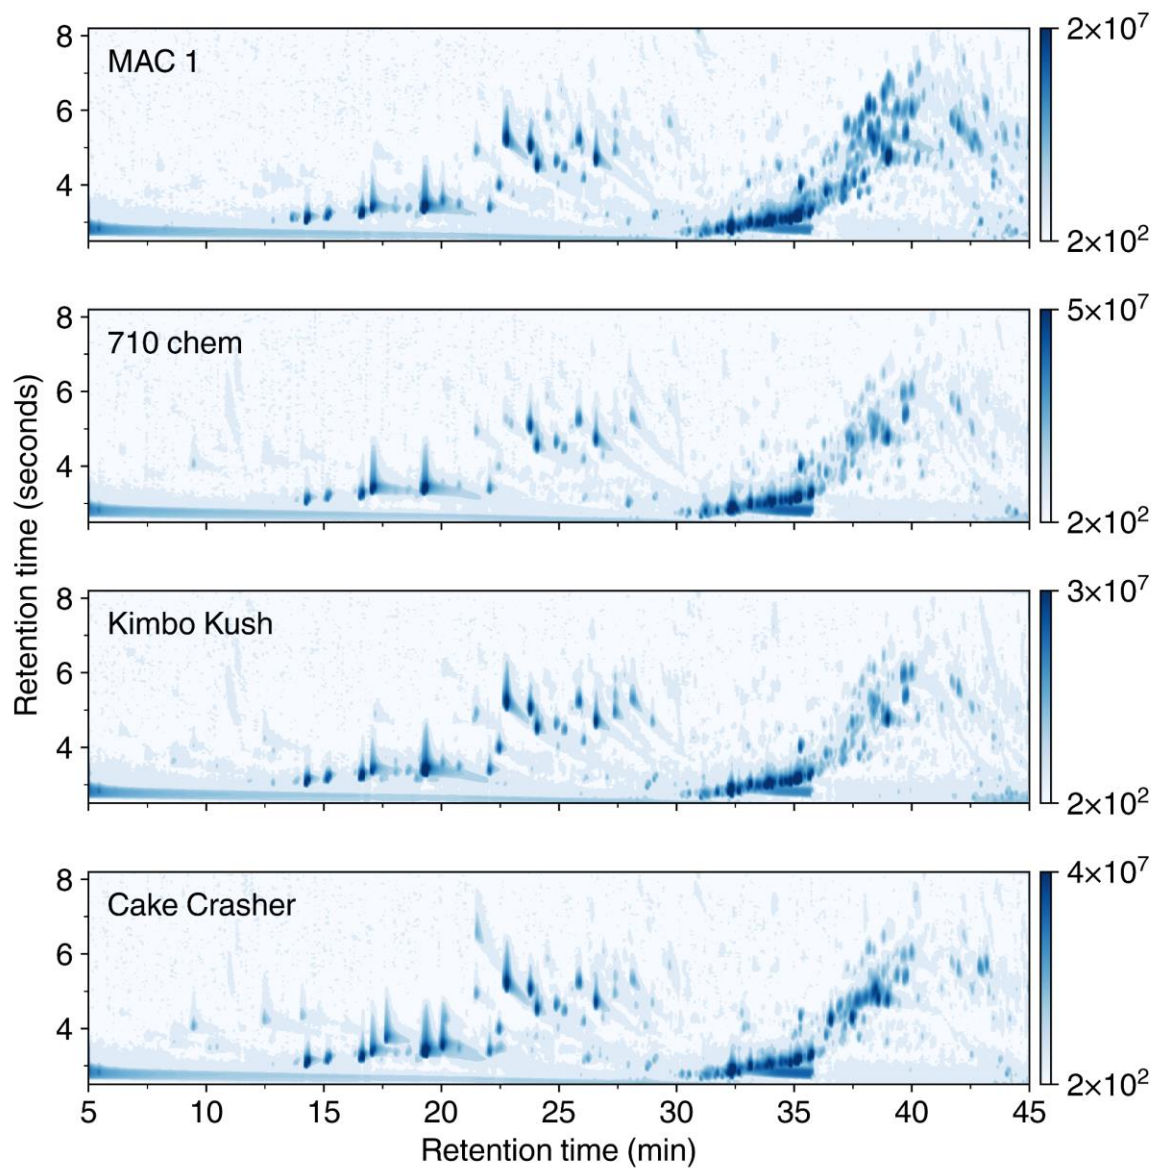

**Figure S11.** GCxGC-FID 2-Dimensional chromatograms for MAC 1, 710 Chem, Kimbo Kush, and Cake Crasher.



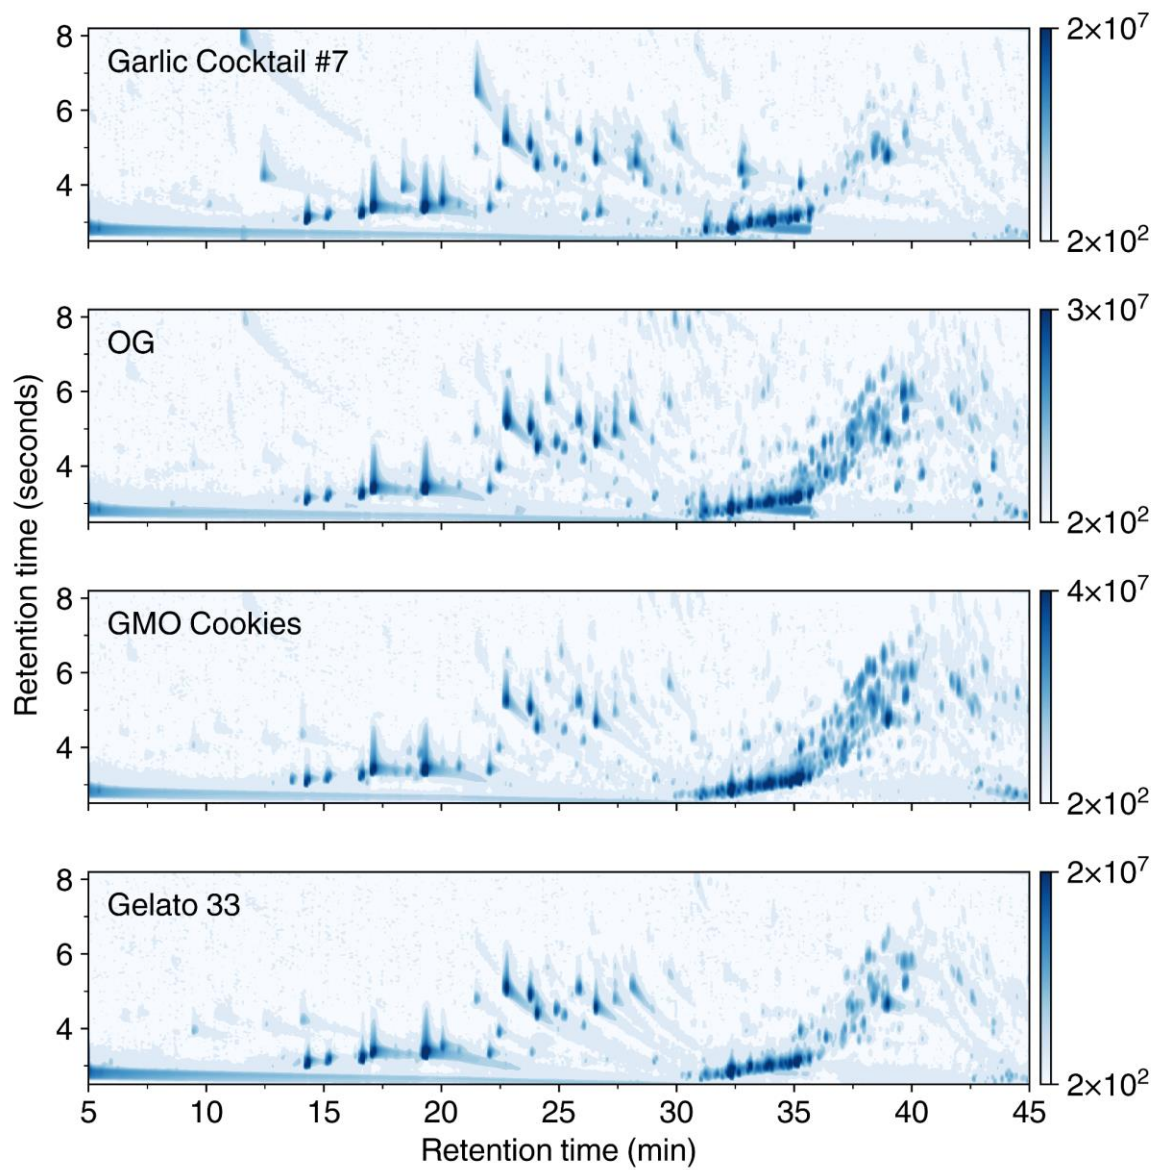

**Figure S12.** GCxGC-FID 2-Dimensional chromatograms for Garlic Cocktail #7, OG, GMO Cookies, and Gelato 33.



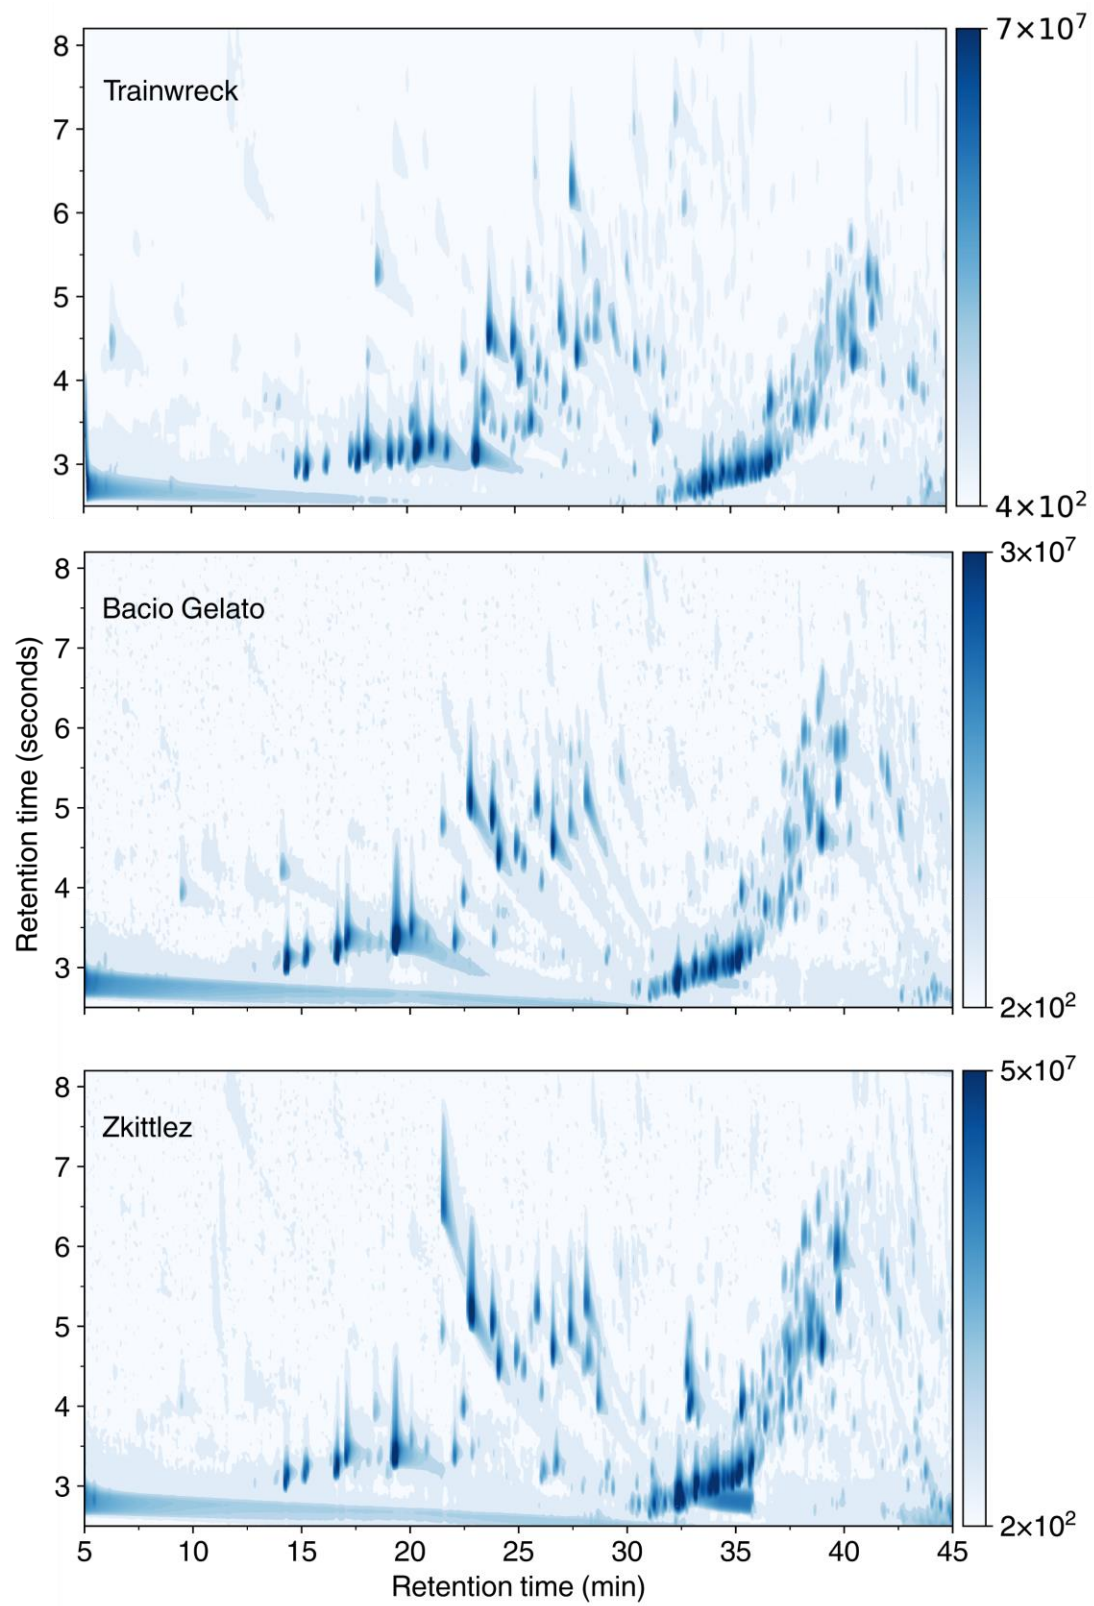

**Figure S13.** GCxGC-FID 2-Dimensional chromatograms for Trainwreck, Bacio Gelato, and Zkittlez 710.

**Mass spectra of analytes.** All analytes used were indexed using the NIST17 mass structural database. Standards were then used to confirm retention times and mass spectral data for all analytes.

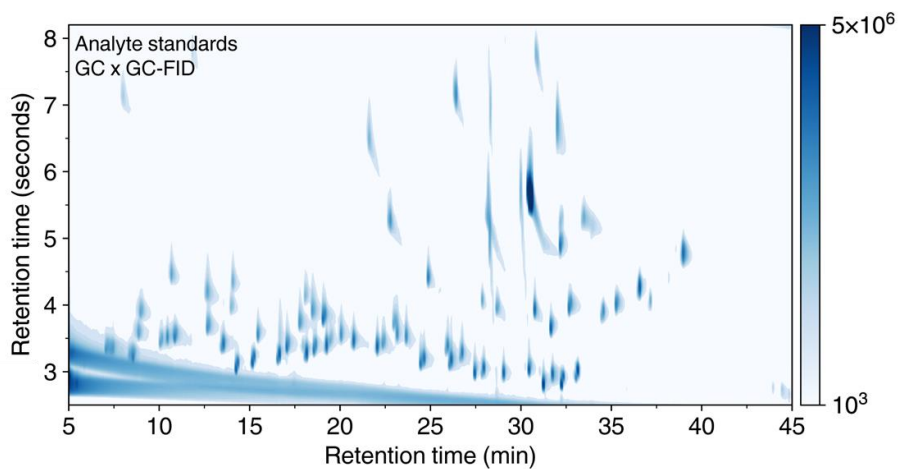

**Figure S14.** GC  $\times$  GC-FID chromatogram of analyte standards. Independent standards were combined graphically. Two bands exist in the analyte standard chromatogram as ethanol was used as the solvent for the FLV-1 standard versus hexanes for the remaining samples. The dark peak near  $^1t_r \sim 31$  min  $^2t_r \sim 5.8$  is triacetin, the solvent FLV-1 was prepared in.

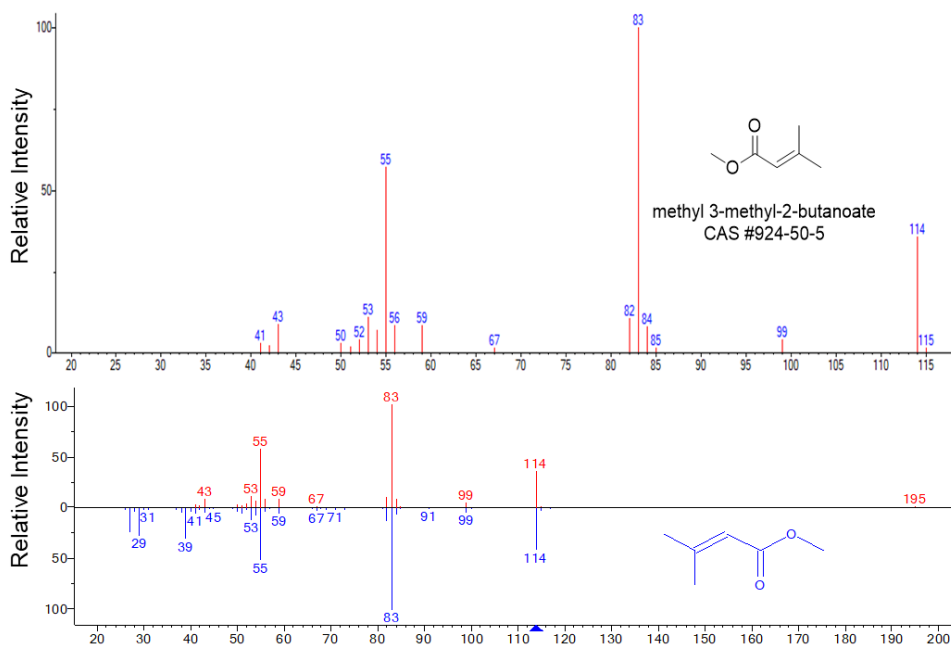

**Figure S15.** Comparison of mass spectra of methyl senecioate found in Bubba Kush (top) and the NIST Spectral Library v17 (2017) (bottom).

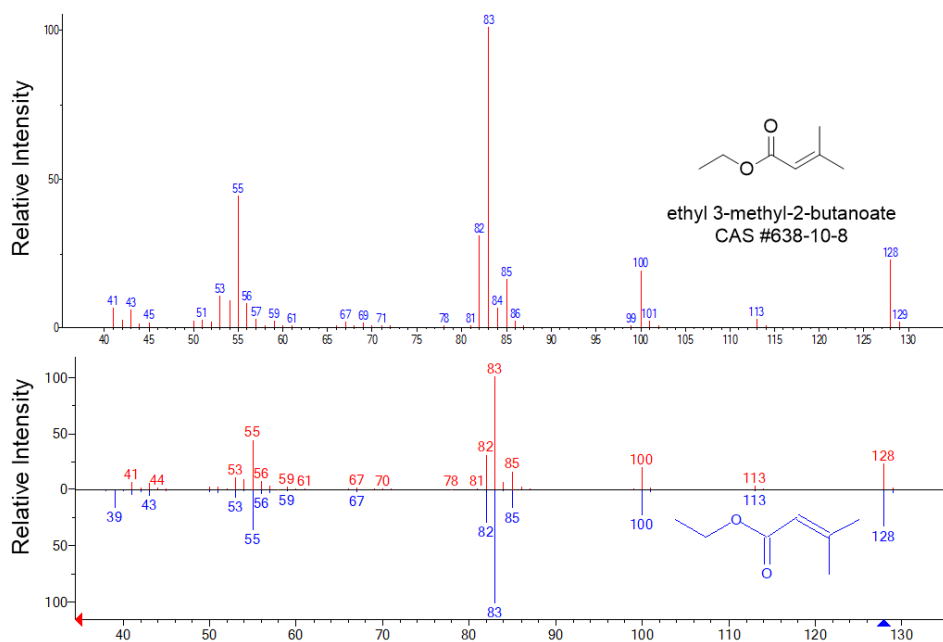

**Figure S16.** Comparison of mass spectra of ethyl senecioate found in Bubba Kush (top) and the NIST Spectral Library v17 (2017) (bottom).

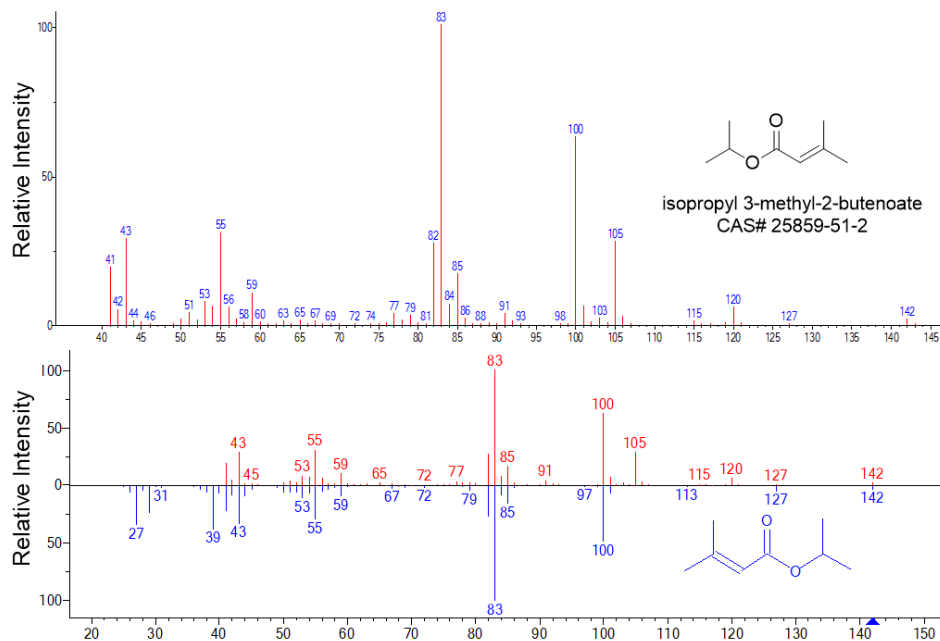

**Figure S17.** Comparison of mass spectra of isopropyl senecioate found in Bubba Kush (top) and the NIST Spectral Library v17 (2017) (bottom).

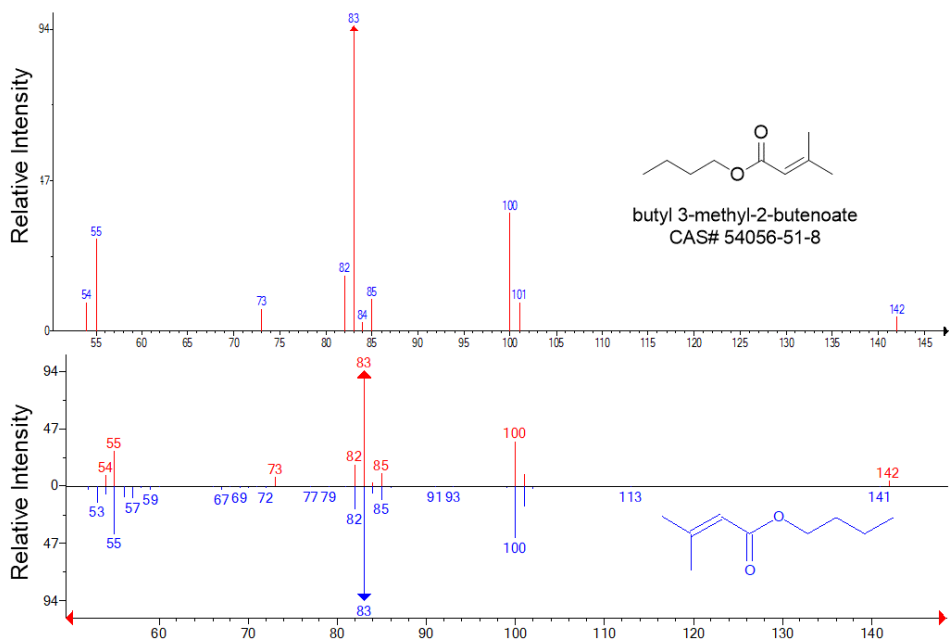

**Figure S18.** Comparison of mass spectra of *n*-butyl senecioate found in Bubba Kush (top) and the NIST Spectral Library v17 (2017) (bottom).

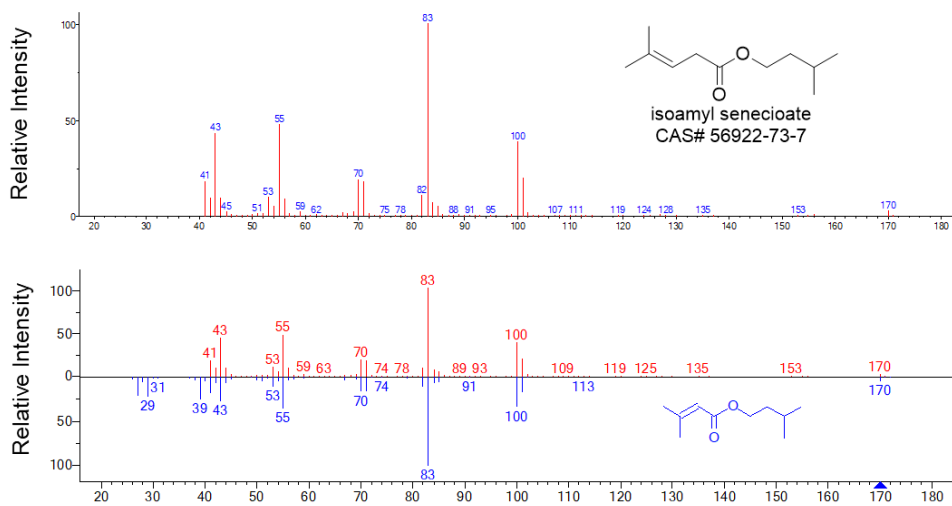

**Figure S19.** Comparison of mass spectra of isoamyl senecioate found in Grape Pie x Do-Si-Do (top) and the NIST Spectral Library v17 (2017) (bottom).

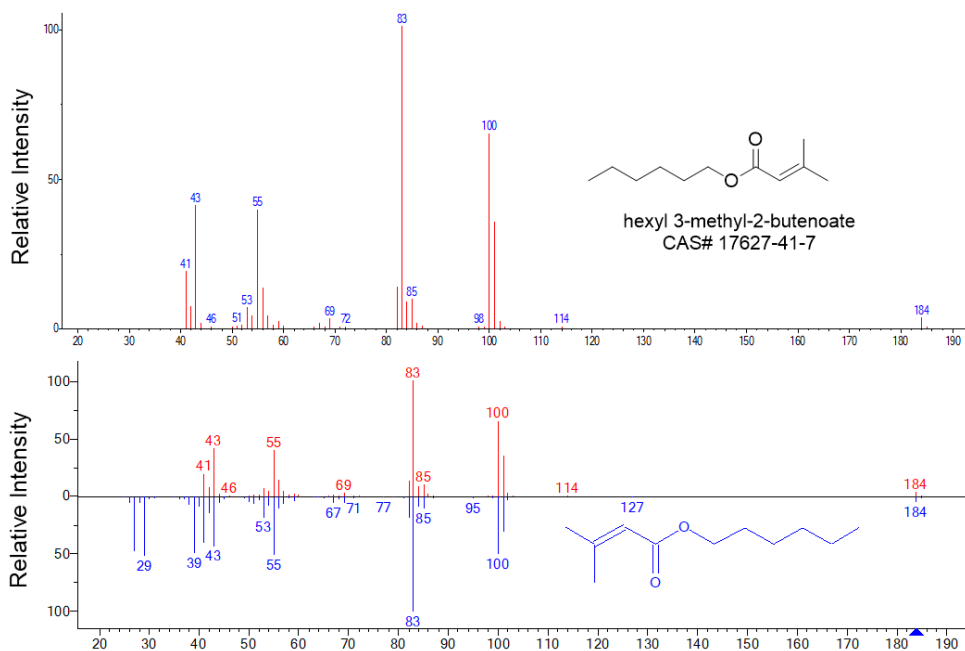

**Figure S20.** Comparison of mass spectra of n-hexyl senecioate found in Bubba Kush (top) and the NIST Spectral Library v17 (2017) (bottom).

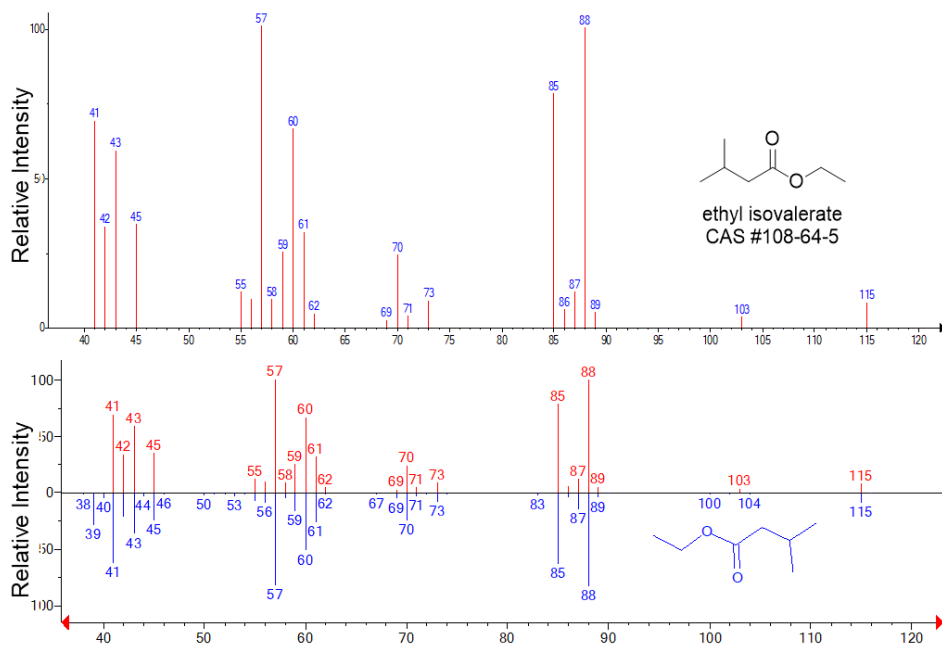

**Figure S21.** Comparison of mass spectra of ethyl isovalerate found in Bubba Kush (top) and the NIST Spectral Library v17 (2017) (bottom).

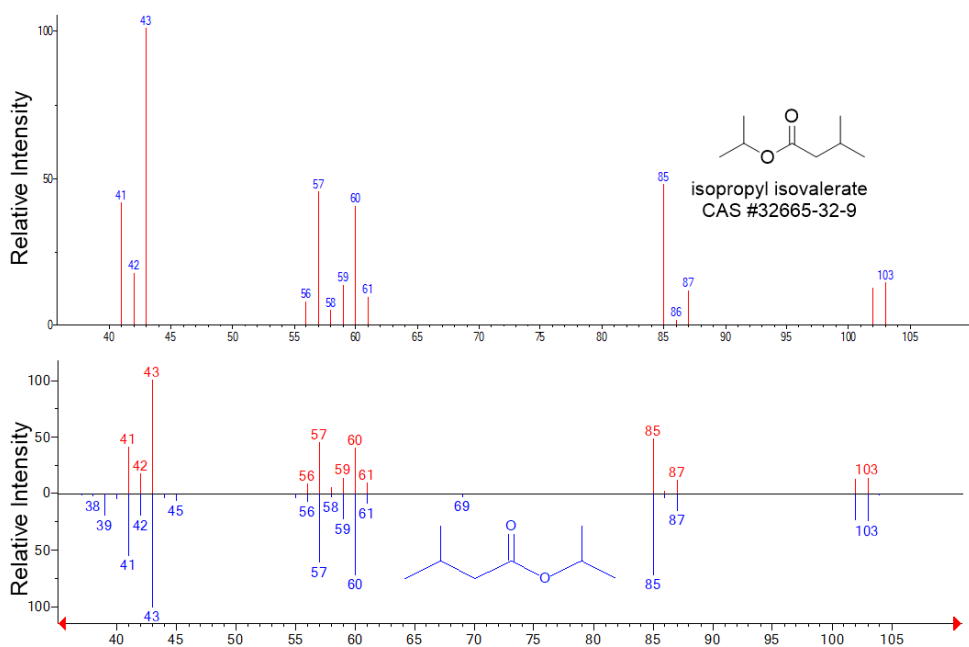

**Figure S22.** Comparison of mass spectra of isopropyl isovalerate (isopropyl isobutyrate) found in Bubba Kush (top) and the NIST Spectral Library v17 (2017) (bottom).

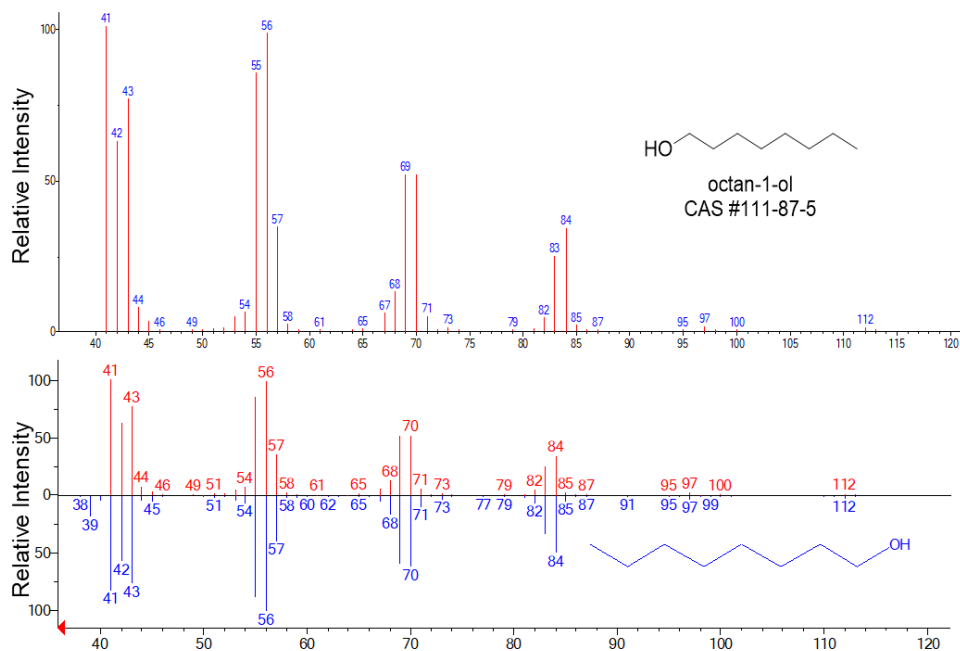

**Figure S23.** Comparison of mass spectra of 1-octanol found in Bubba Kush (top) and the NIST Spectral Library v17 (2017) (bottom).

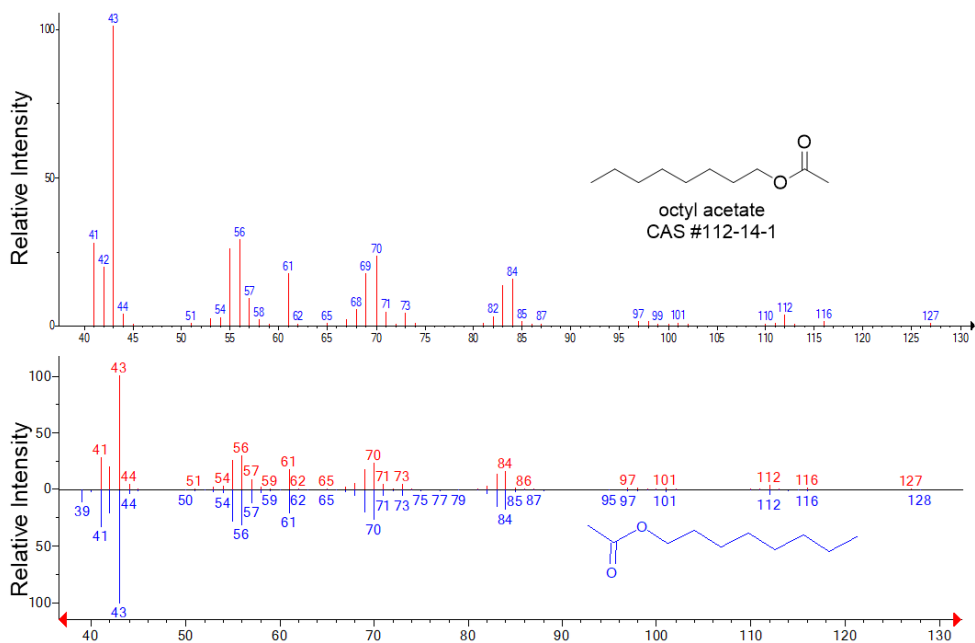

**Figure S24.** Comparison of mass spectra of *n*-octyl acetate found in Bubba Kush (top) and the NIST Spectral Library v17 (2017) (bottom).

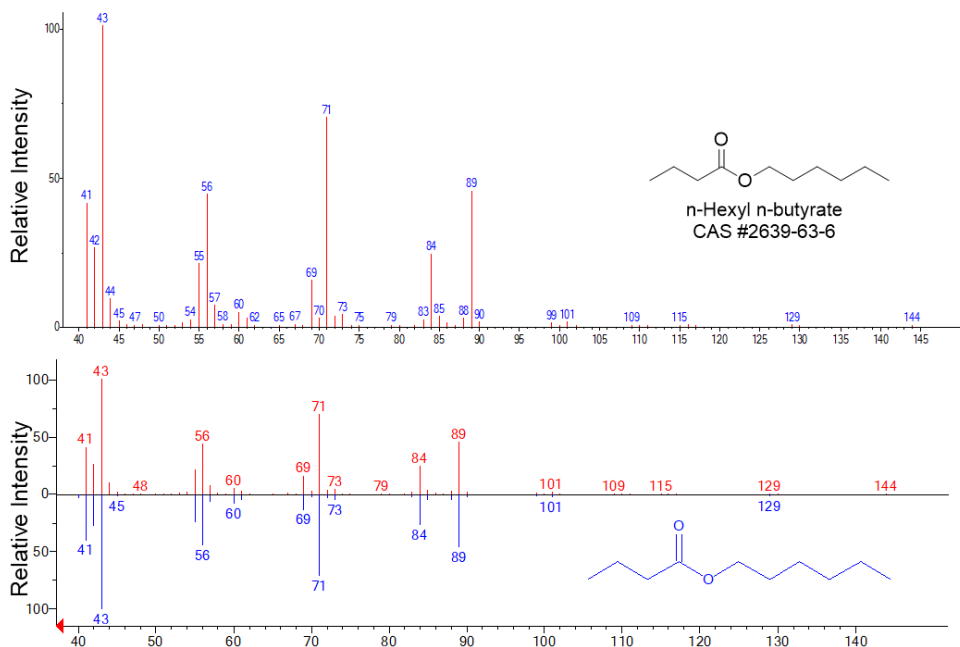

**Figure S25.** Comparison of mass spectra of *n*-hexyl *n*-butyrate found in Bubba Kush (top) and the NIST Spectral Library v17 (2017) (bottom).

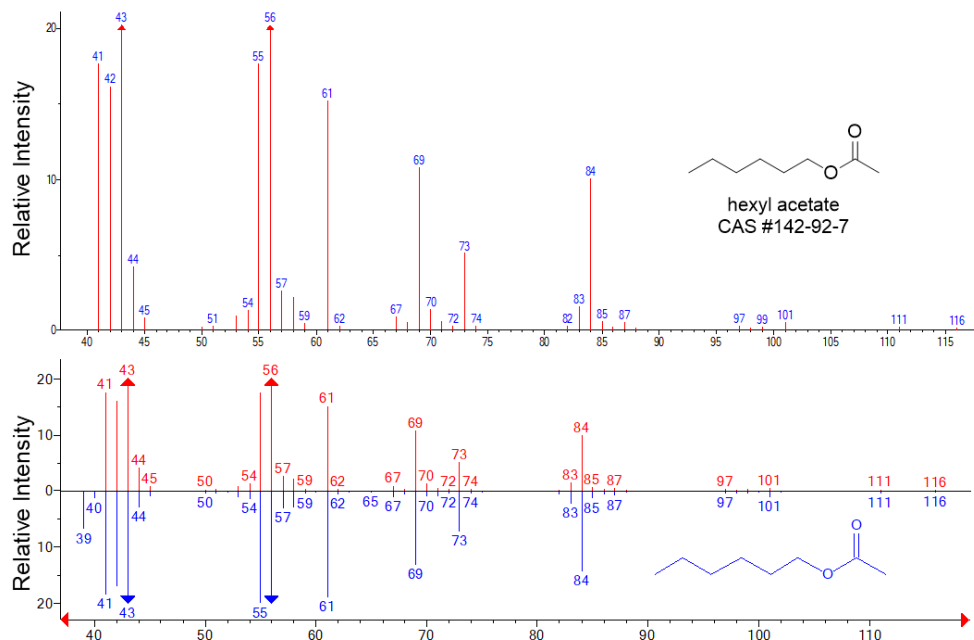

**Figure S26.** Comparison of mass spectra of *n*-hexyl acetate found in Bubba Kush (top) and the NIST Spectral Library v17 (2017) (bottom).

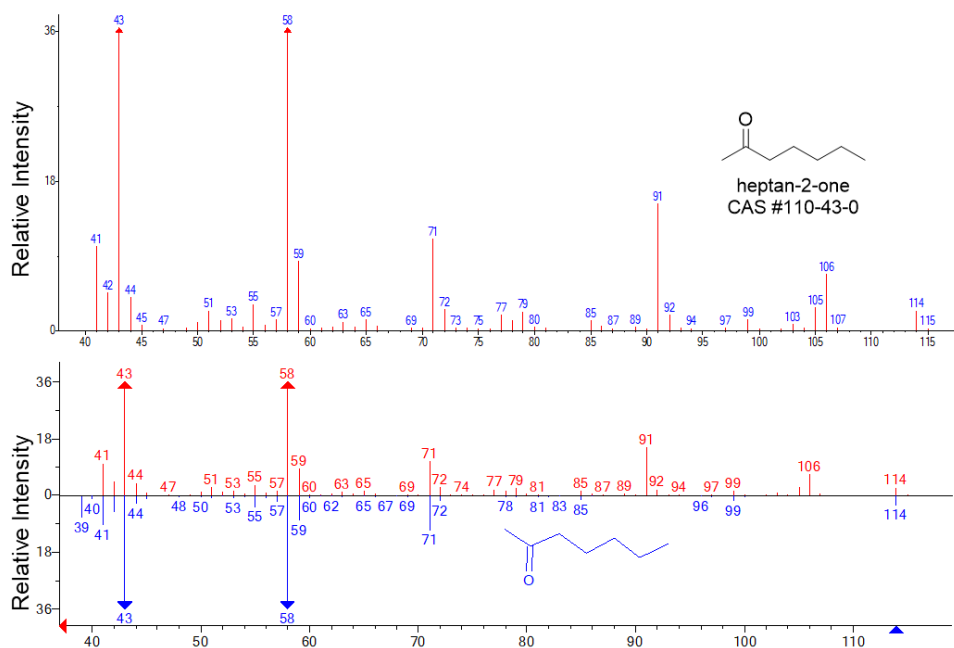

**Figure S27.** Comparison of mass spectra of 2-heptanone found in Bubba Kush (top) and the NIST Spectral Library v17 (2017) (bottom).



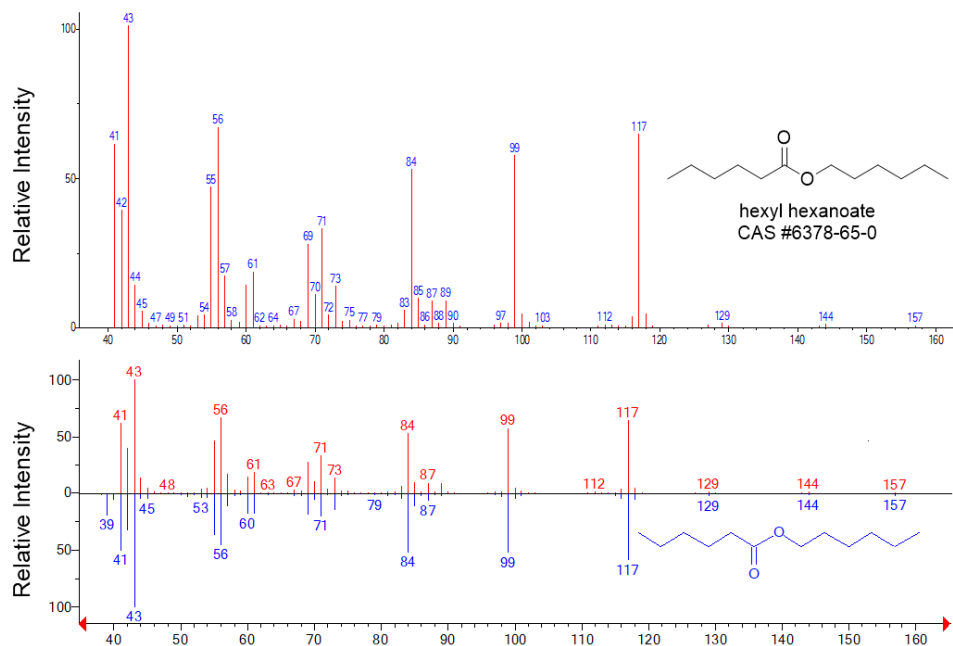

**Figure S28.** Comparison of mass spectra of *n*-hexyl hexanoate found in Juiceman (top) and the NIST Spectral Library v17 (2017) (bottom).

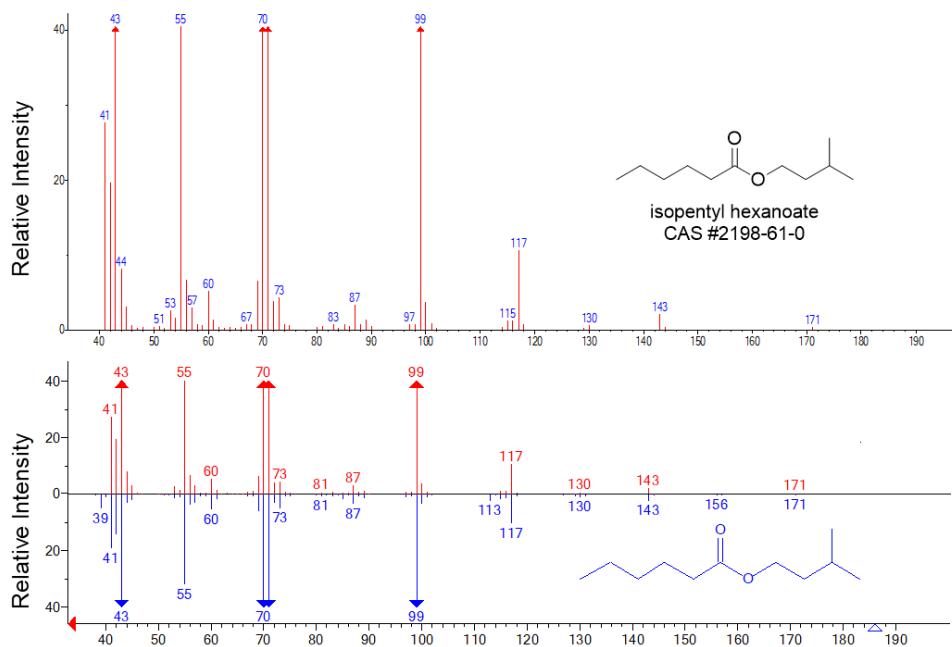

**Figure S29.** Comparison of mass spectra of isopentyl hexanoate (i.e., isoamyl hexanoate) found in Juiceman (top) and the NIST Spectral Library v17 (2017) (bottom).

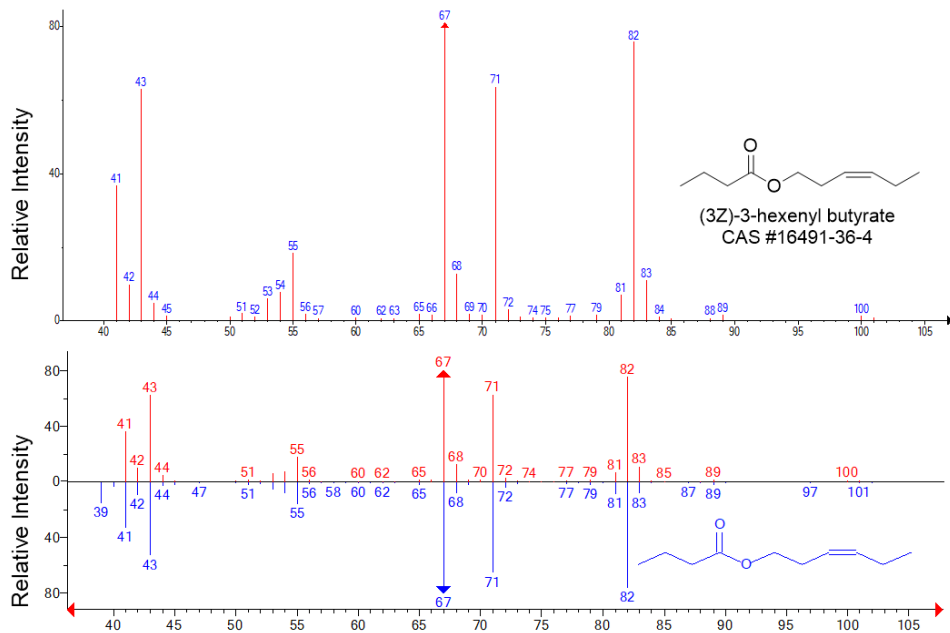

**Figure S30.** Comparison of mass spectra of *cis*-3-hexenyl *n*-butyrate found in Juiceman (top) and the NIST Spectral Library v17 (2017) (bottom).

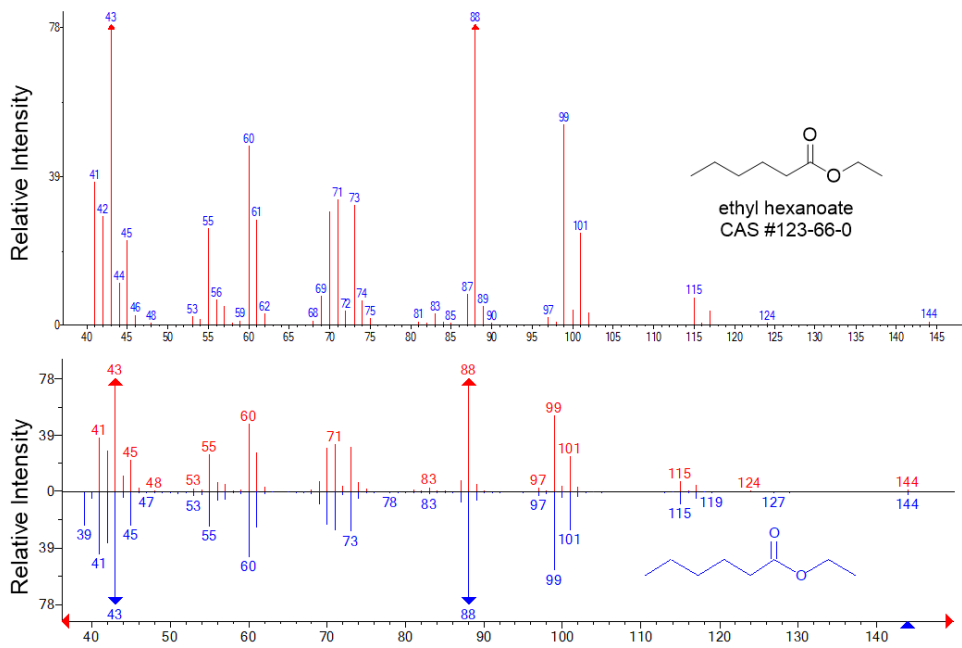

**Figure S31.** Comparison of mass spectra of ethyl hexanoate found in Juiceman (top) and the NIST Spectral Library v17 (2017) (bottom).

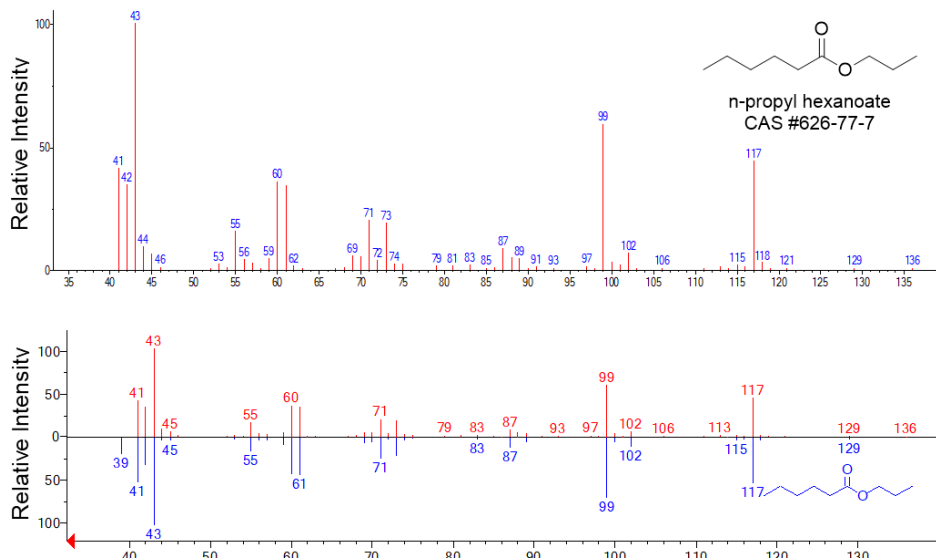

**Figure S32.** Comparison of mass spectra of n-propyl hexanoate found in Juiceman (top) and the NIST Spectral Library v17 (2017) (bottom).

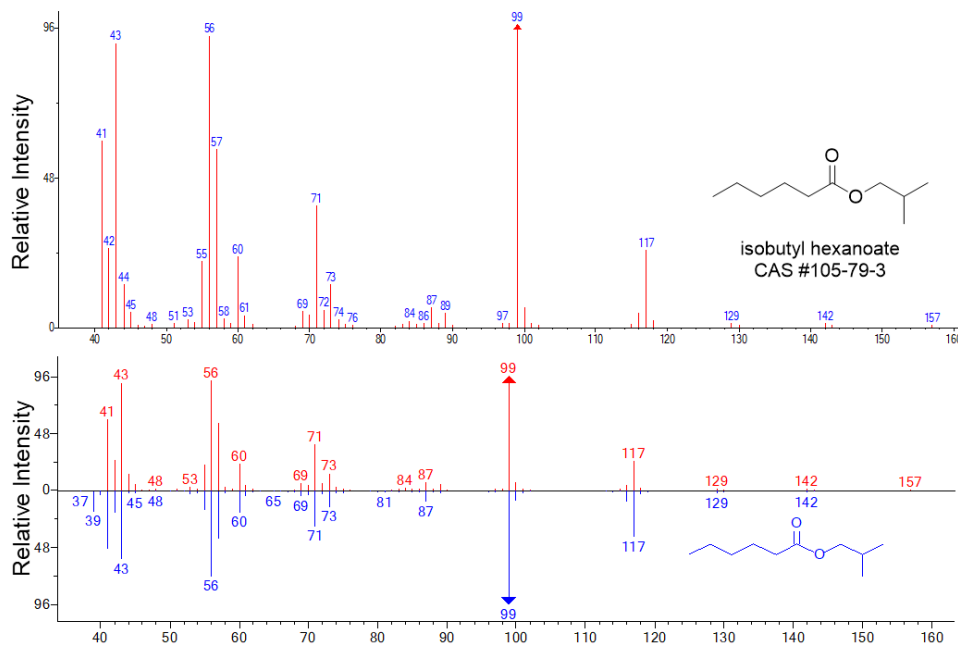

**Figure S33.** Comparison of mass spectra of isobutyl hexanoate found in Juiceman (top) and the NIST Spectral Library v17 (2017) (bottom).

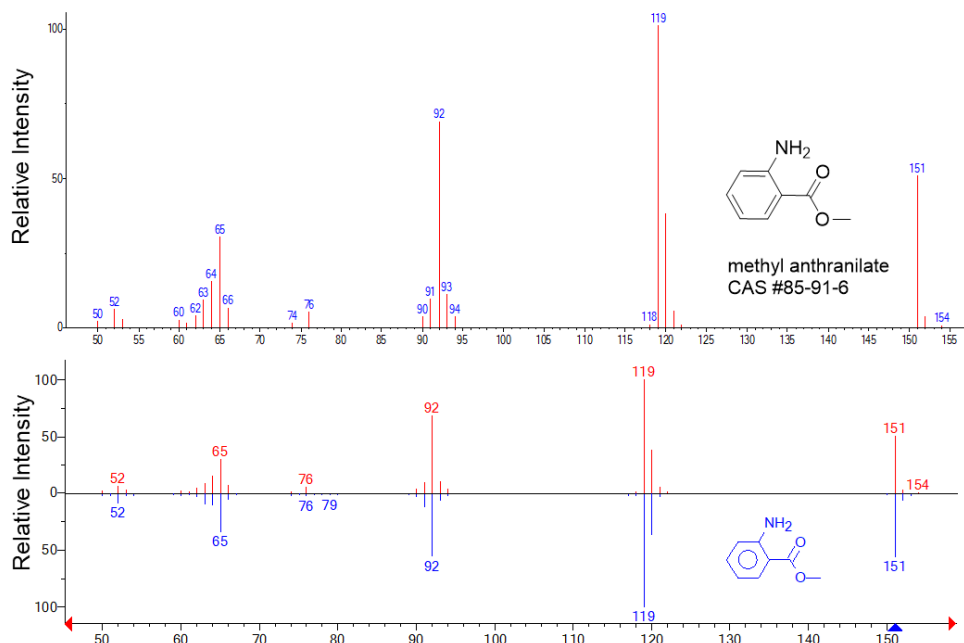

**Figure S34.** Comparison of mass spectra of methyl anthranilate found in Juiceman (top) and the NIST Spectral Library v17 (2017) (bottom).

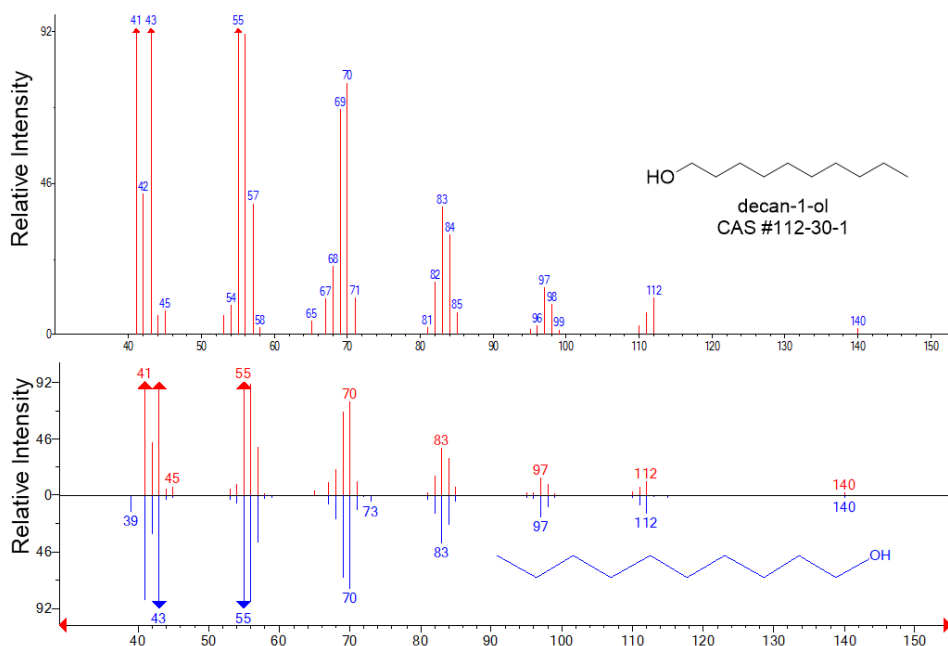

**Figure S35.** Comparison of mass spectra of 1-decanol found in Juiceman (top) and the NIST Spectral Library v17 (2017) (bottom).

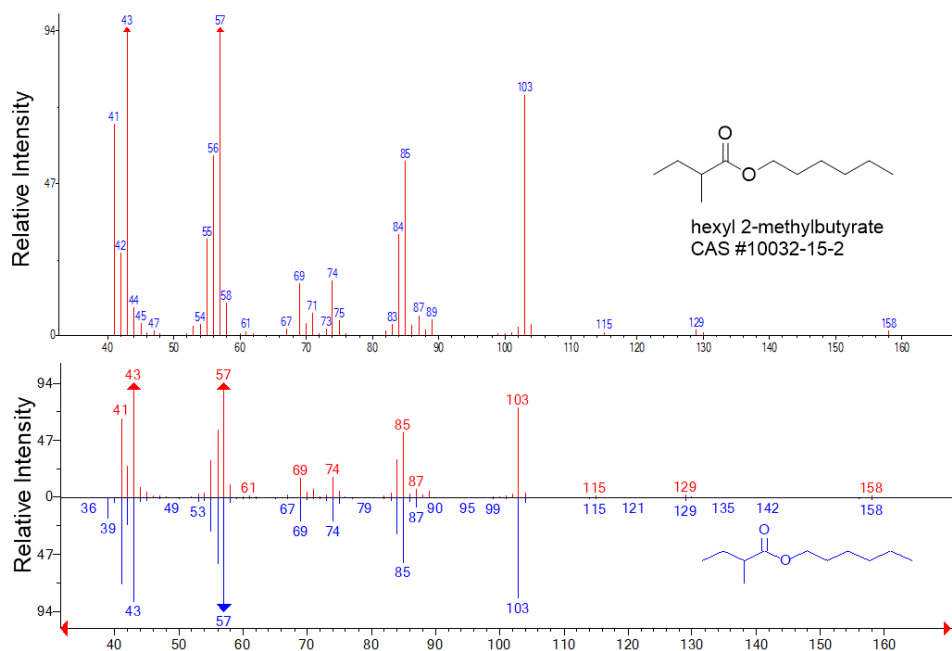

**Figure S36.** Comparison of mass spectra of hexyl 2-methylbutyrate found in Juiceman (top) and the NIST Spectral Library v17 (2017) (bottom).

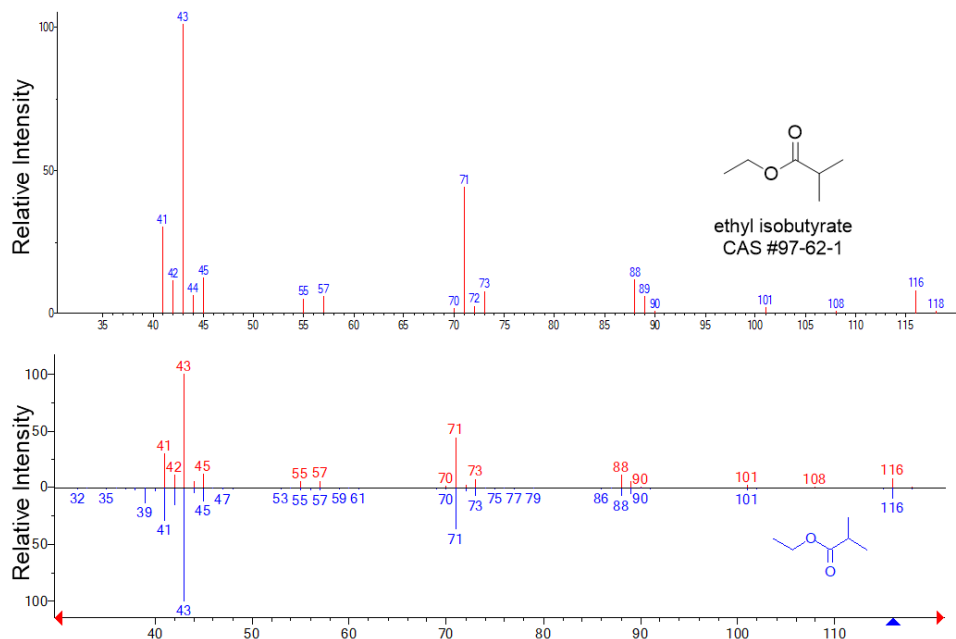

**Figure S37.** Comparison of mass spectra of ethyl isobutyrate found in Juiceman (top) and the NIST Spectral Library v17 (2017) (bottom).

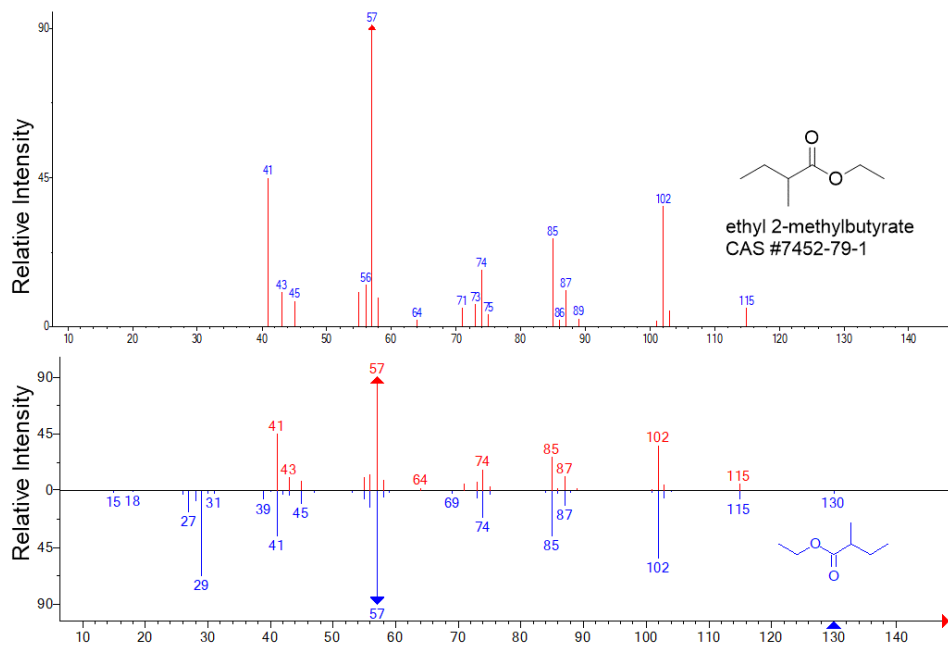

**Figure S38.** Comparison of mass spectra of ethyl 2-methylbutyrate found in Juiceman (top) and the NIST Spectral Library v17 (2017) (bottom).

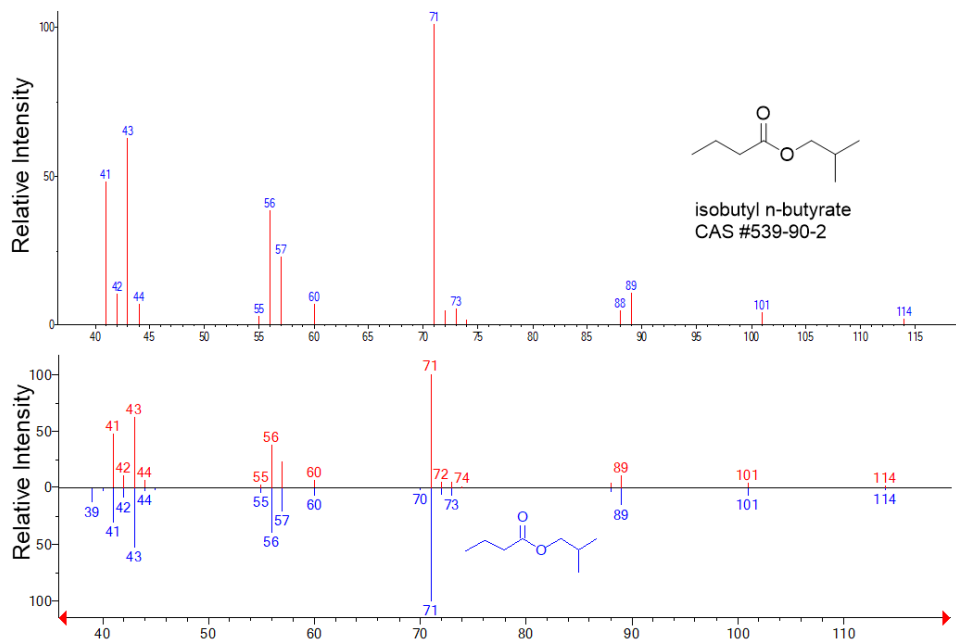

**Figure S39.** Comparison of mass spectra of isobutyl n-butyrate found in Juiceman (top) and the NIST Spectral Library v17 (2017) (bottom).

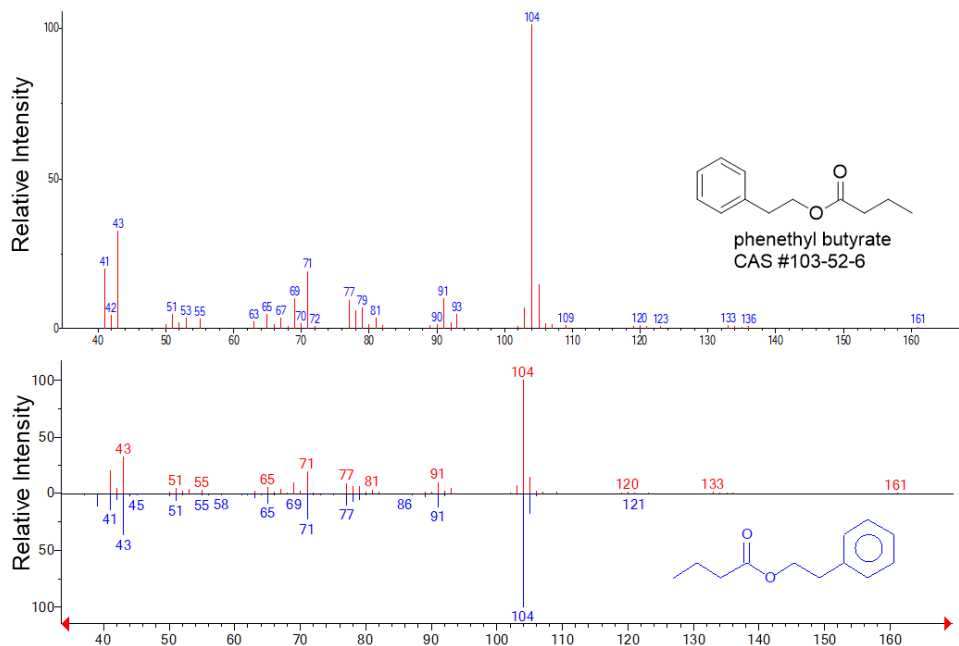

**Figure S40.** Comparison of mass spectra of phenethyl *n*-butyrate found in Juiceman (top) and the NIST Spectral Library v17 (2017) (bottom).

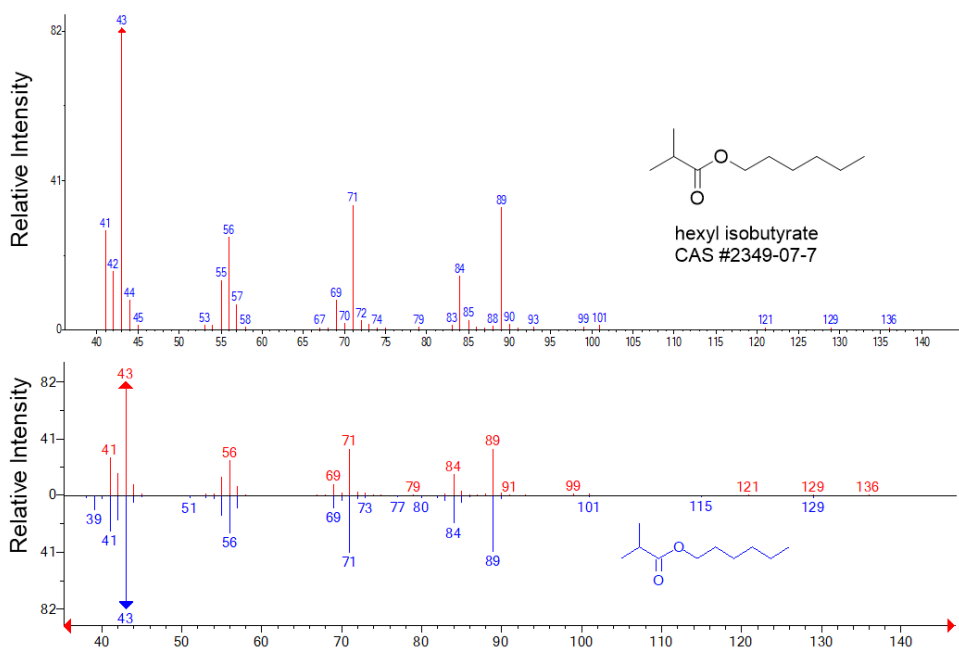

**Figure S41.** Comparison of mass spectra of *n*-hexyl isobutyrate found in Juiceman (top) and the NIST Spectral Library v17 (2017) (bottom).

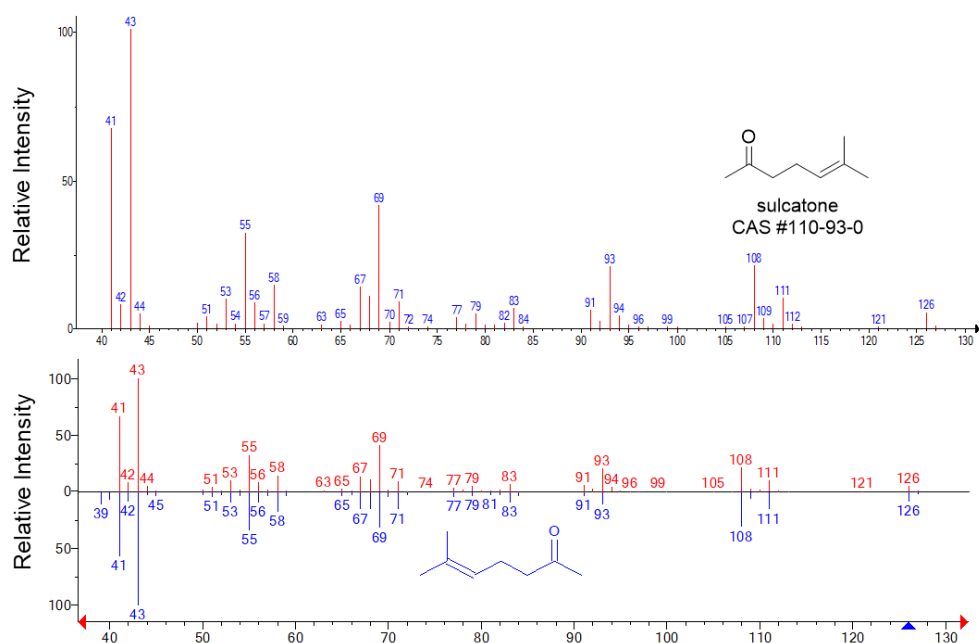

**Figure S42.** Comparison of mass spectra of sulcatone found in Juiceman (top) and the NIST Spectral Library v17 (2017) (bottom).

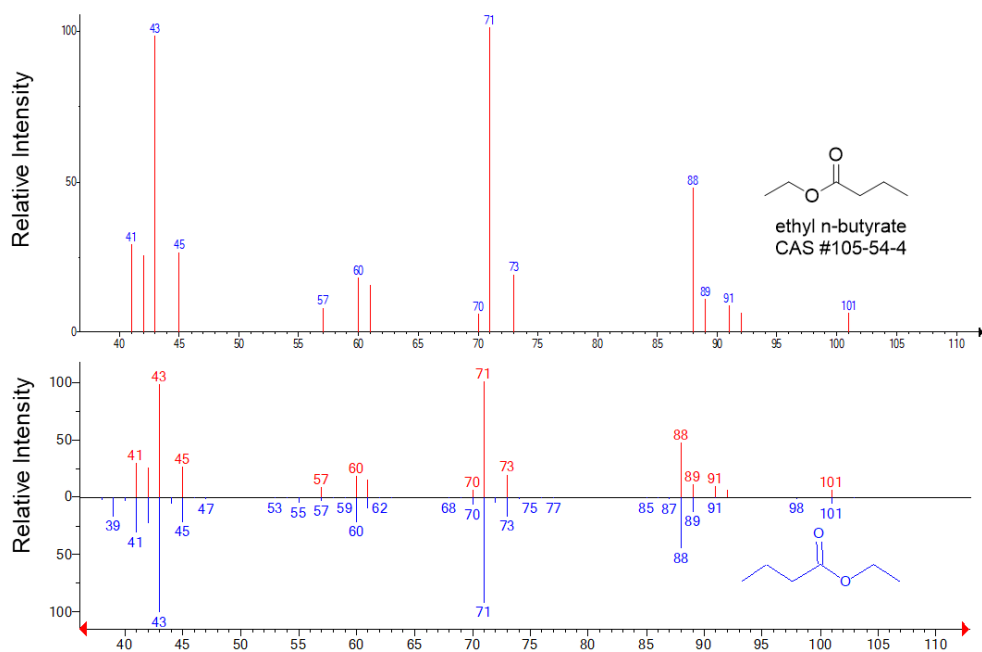

**Figure S43.** Comparison of mass spectra of ethyl *n*-butyrate found in Motor Nana (top) and the NIST Spectral Library v17 (2017) (bottom).



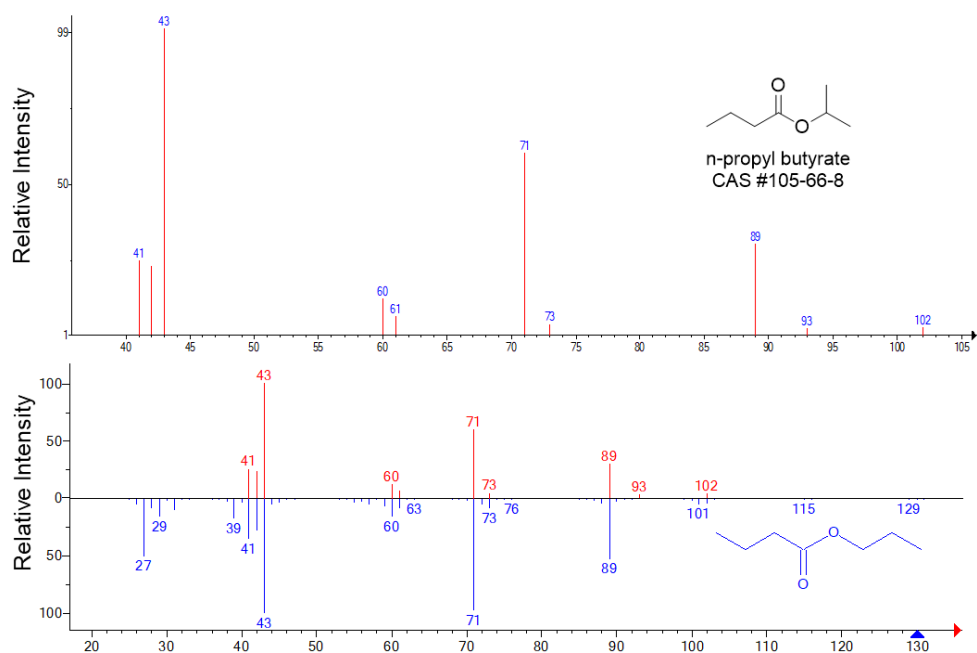

**Figure S44.** Comparison of mass spectra of *n*-propyl *n*-butyrate found in Juiceman (top) and the NIST Spectral Library v17 (2017) (bottom).

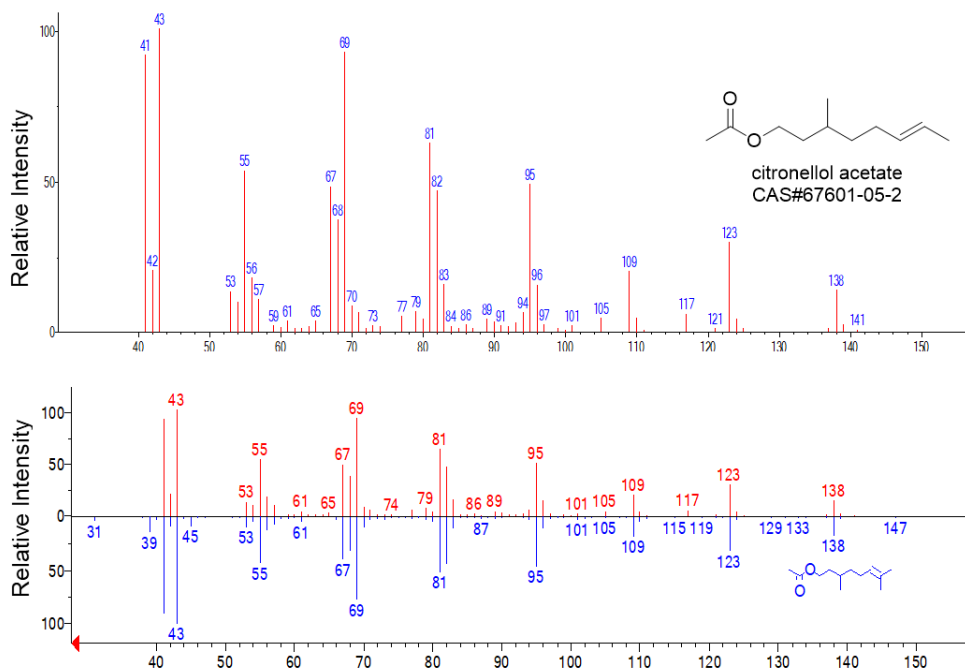

**Figure S45.** Comparison of mass spectra of citronellol acetate found in Juiceman (top) and the NIST Spectral Library v17 (2017) (bottom).

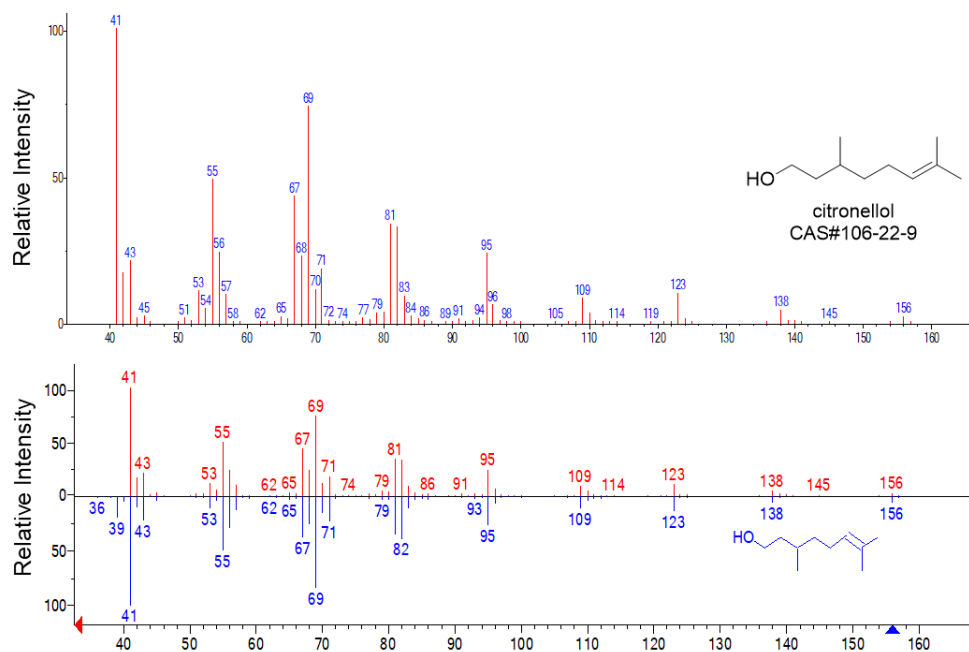

**Figure S46.** Comparison of mass spectra of citronellol found in Juiceman (top) and the NIST Spectral Library v17 (2017) (bottom).

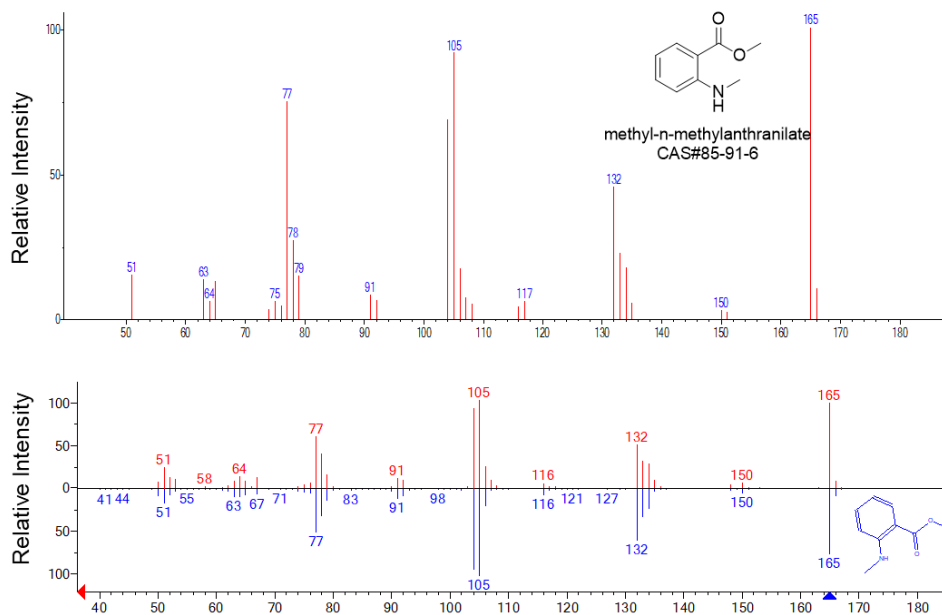

**Figure S47.** Comparison of mass spectra of methyl *n*-methylanthranilate found in Juiceman (top) and the NIST Spectral Library v17 (2017) (bottom).

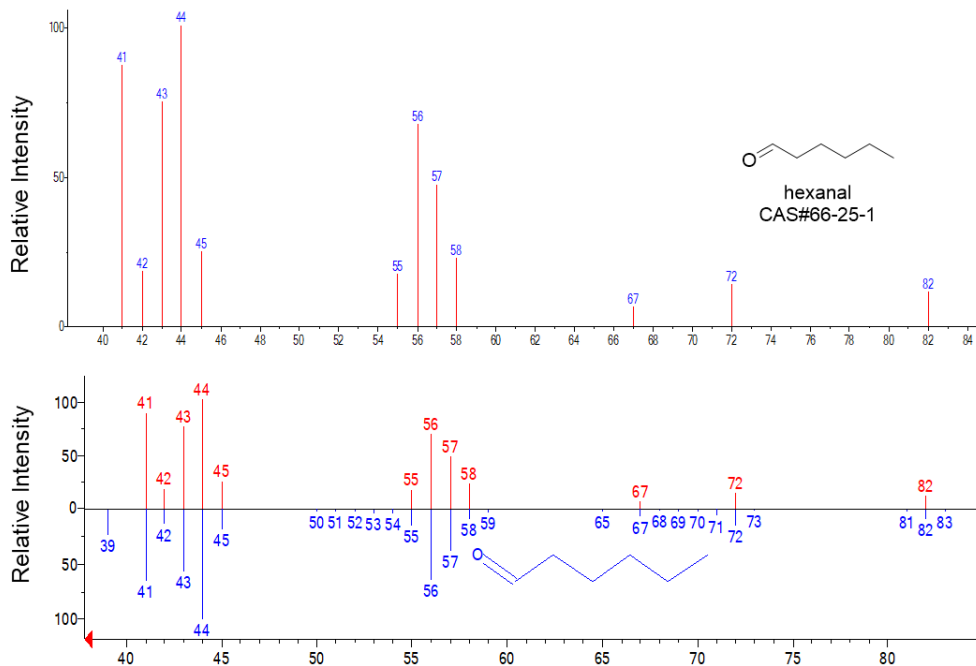

**Figure S48.** Comparison of mass spectra of hexanal found in rainbow 2.0 (top) and the NIST Spectral Library v17 (2017) (bottom).

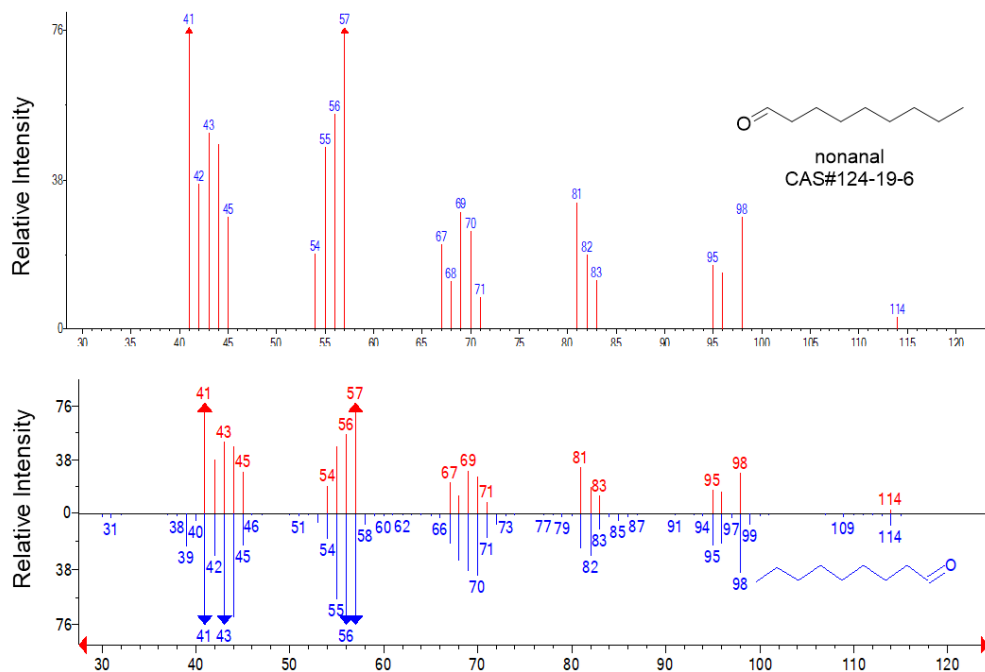

**Figure S49.** Comparison of mass spectra of nonanal found in rainbow 2.0 (top) and the NIST Spectral Library v17 (2017) (bottom).

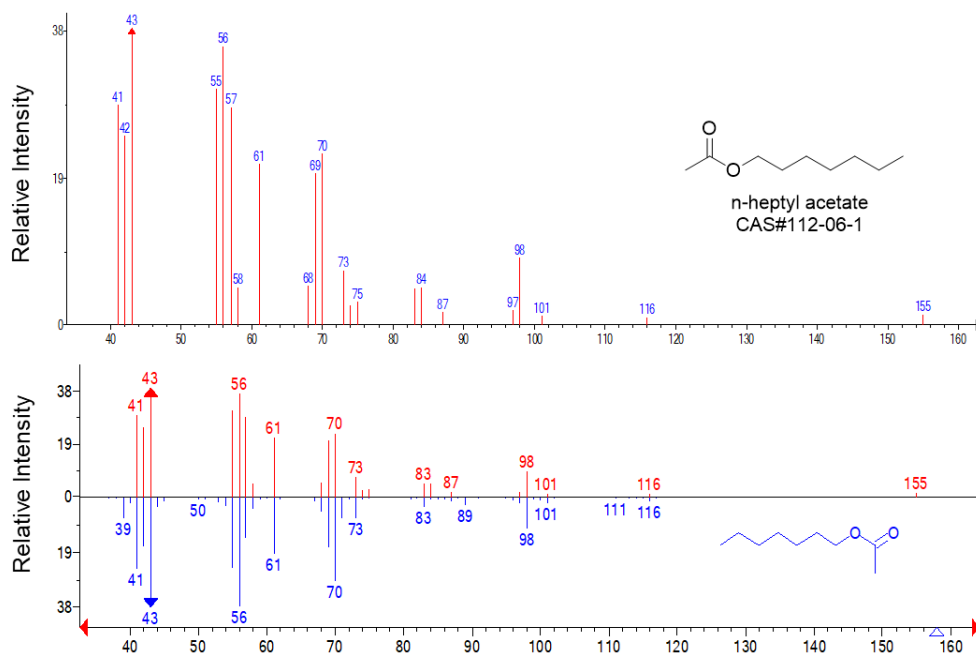

**Figure S50.** Comparison of mass spectra of heptyl acetate found in rainbow 2.0 (top) and the NIST Spectral Library v17 (2017) (bottom).

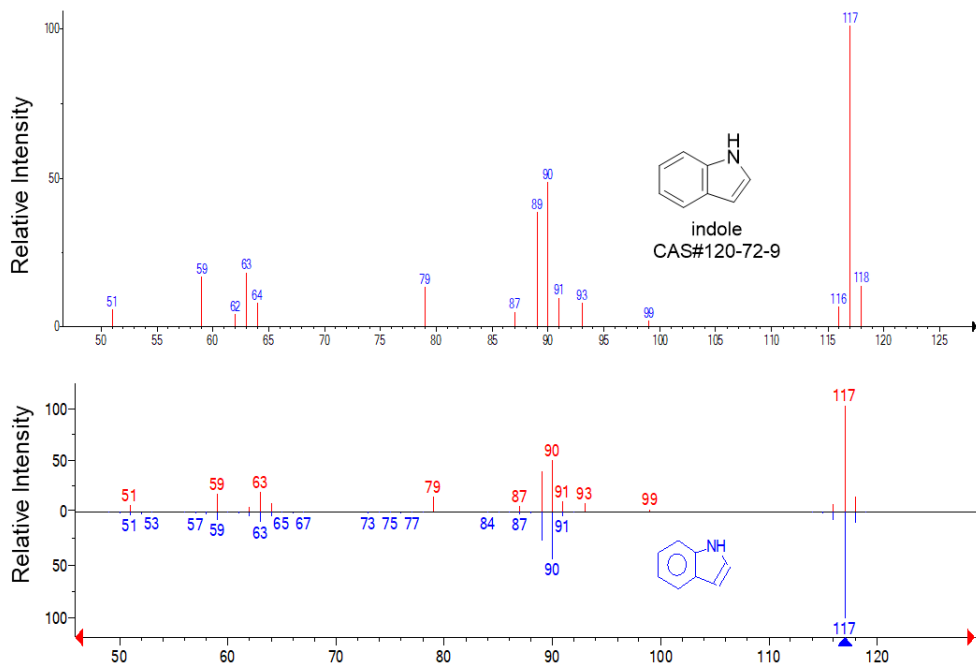

**Figure S51.** Comparison of mass spectra of indole found in fruity pebble (top) and the NIST Spectral Library v17 (2017) (bottom).

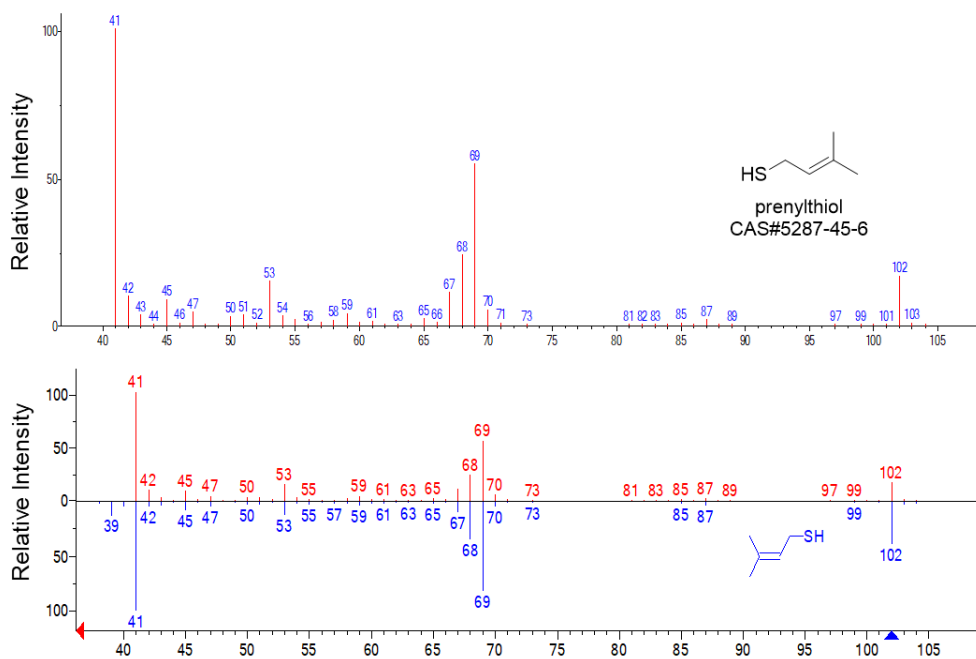

**Figure S52.** Comparison of mass spectra of prenylthiol found in fruity pebbles (top) and the NIST Spectral Library v17 (2017) (bottom).

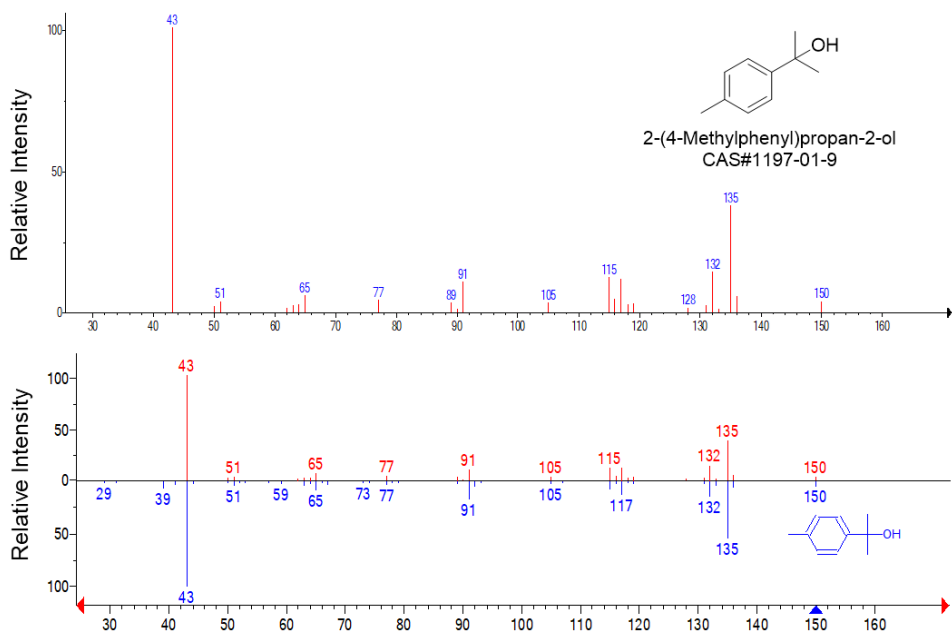

**Figure S53.** Comparison of mass spectra of cherry propanol in starburst 36-1 (top) and the NIST Spectral Library v17 (2017) (bottom).

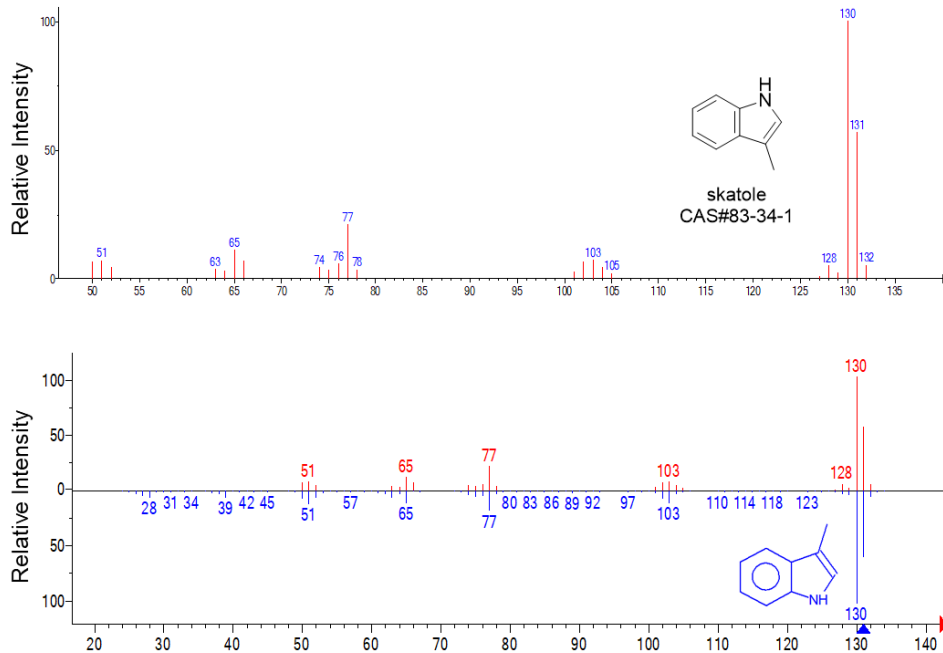

**Figure S54.** Comparison of mass spectra of skatole in fruity pebbles (top) and the NIST Spectral Library v17 (2017) (bottom).

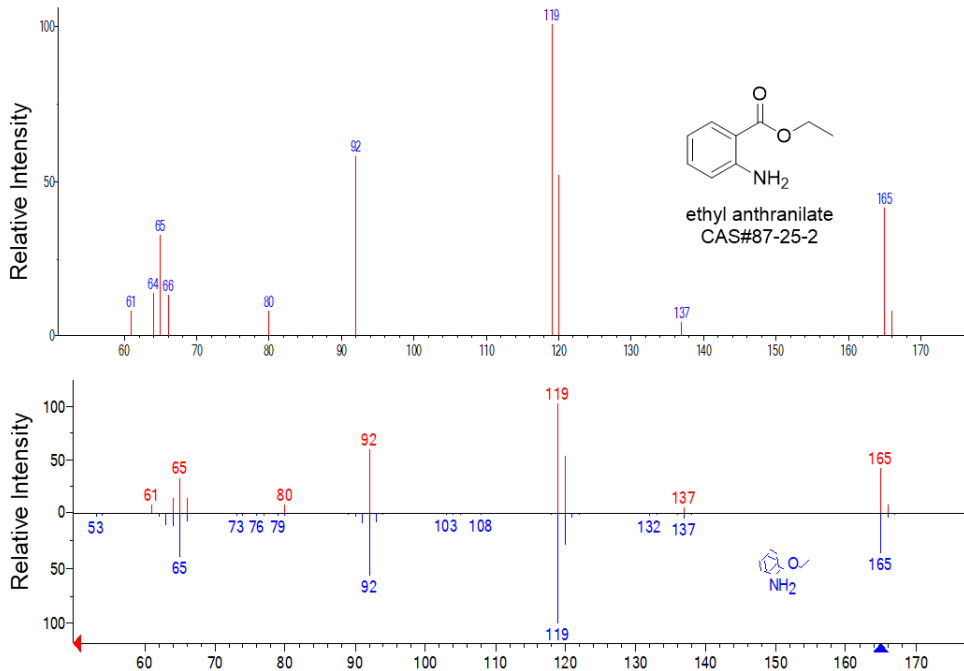

**Figure S55.** Comparison of mass spectra of ethyl anthranilate in fruity pebbles (top) and the NIST Spectral Library v17 (2017) (bottom).

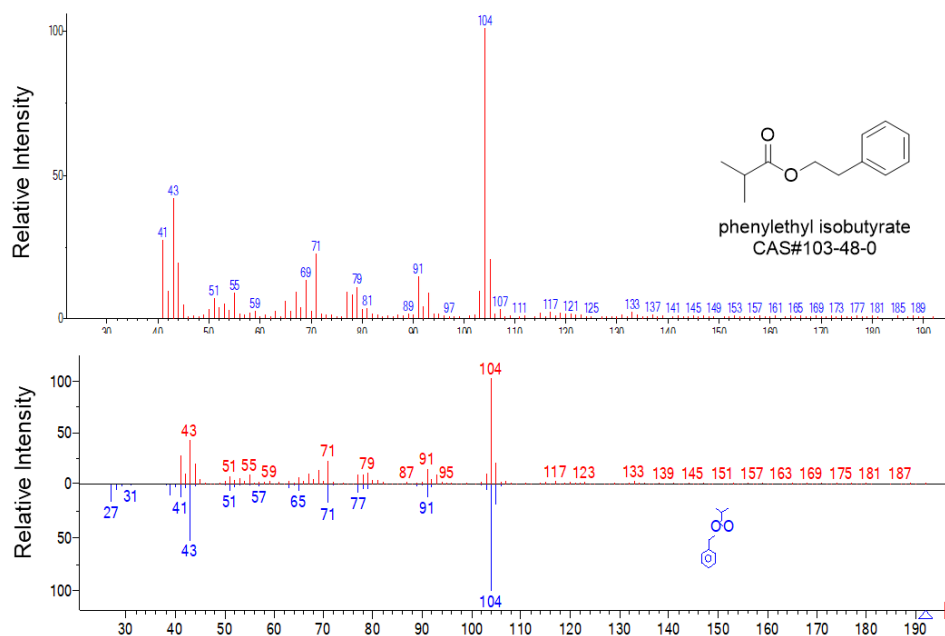

**Figure S56.** Comparison of mass spectra of phenylethyl isobutyrate in Juiceman (top) and the NIST Spectral Library v17 (2017) (bottom).

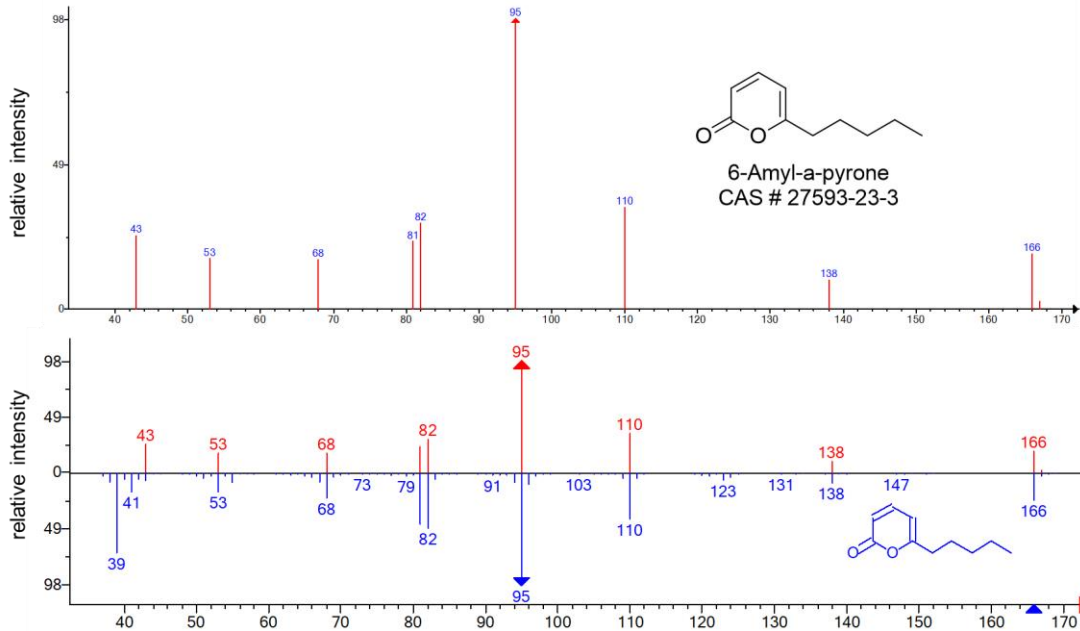

**Figure S57.** Comparison of mass spectra of 6-Amyl- $\alpha$ -pyrone in Zkittlez 710 (top) and the NIST Spectral Library v17 (2017) (bottom).

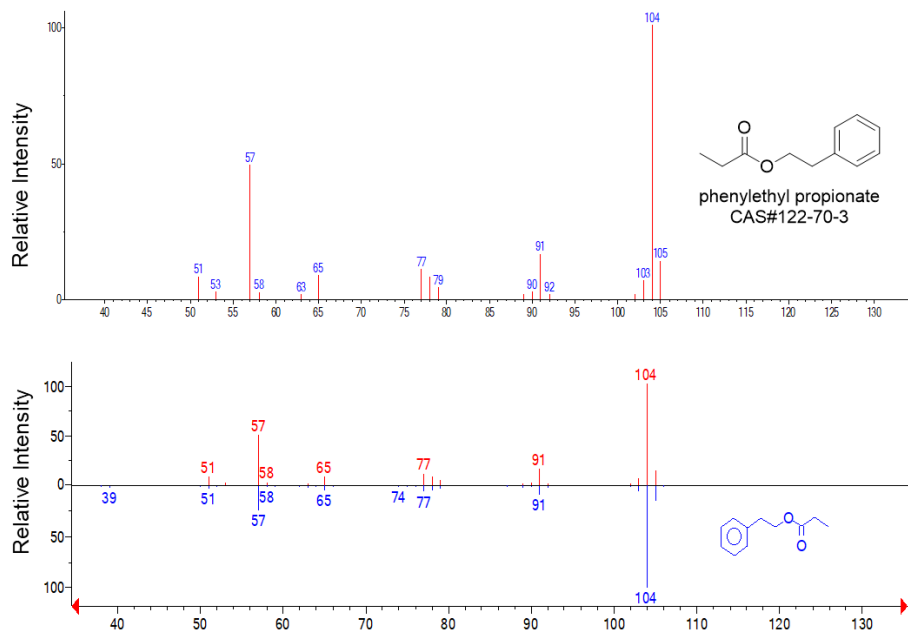

**Figure S58.** Comparison of mass spectra of phenylethyl propionate in juiceman (top) and the NIST Spectral Library v17 (2017) (bottom).

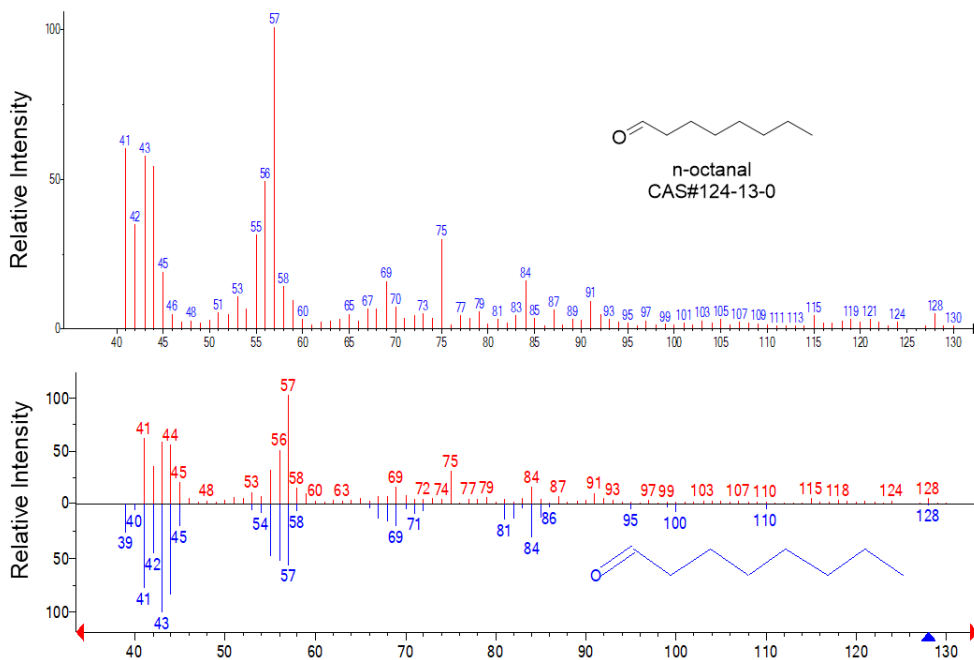

**Figure S59.** Comparison of mass spectra of octanal in gorilla glue (top) and the NIST Spectral Library v17 (2017) (bottom).



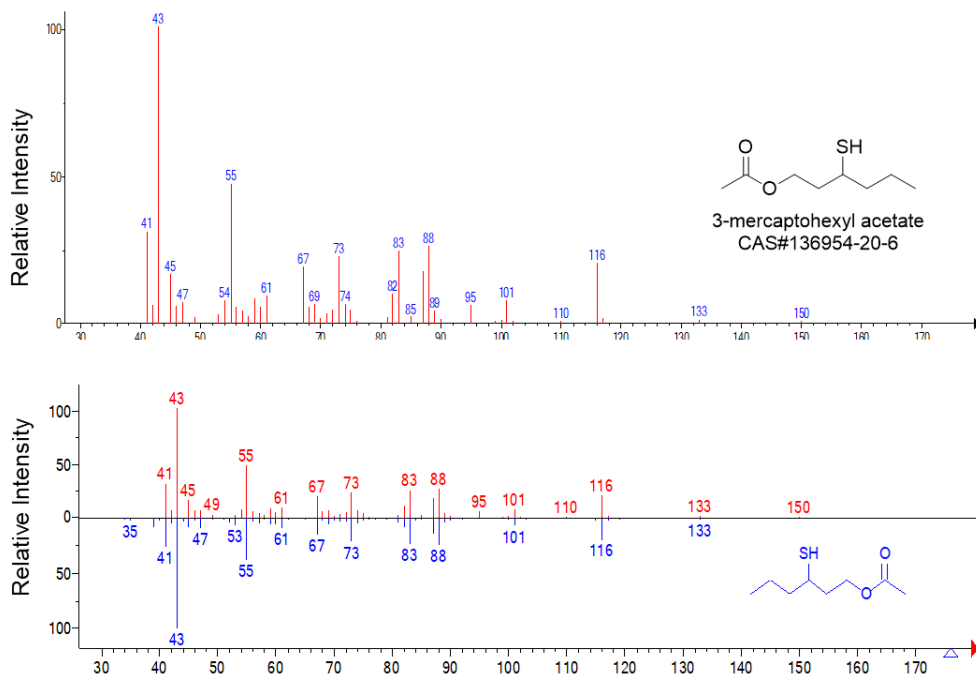

**Figure S60.** Comparison of mass spectra of 3-mercaptohexyl acetate in papaya peach (top) and the NIST Spectral Library v17 (2017) (bottom).

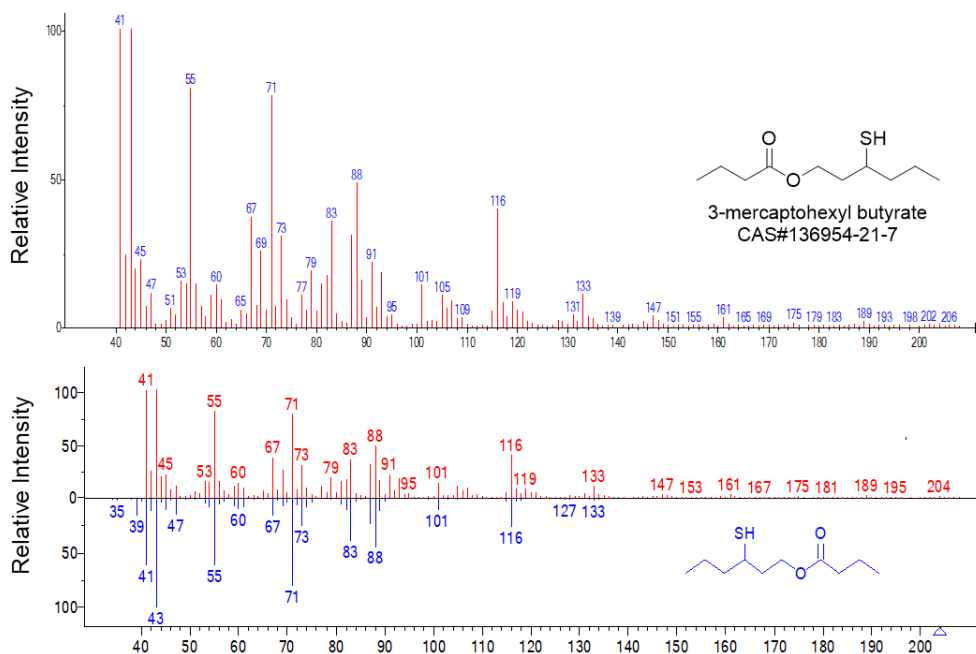

**Figure S61.** Comparison of mass spectra of 3-mercaptohexyl butyrate in gorilla glue (top) and the NIST Spectral Library v17 (2017) (bottom).

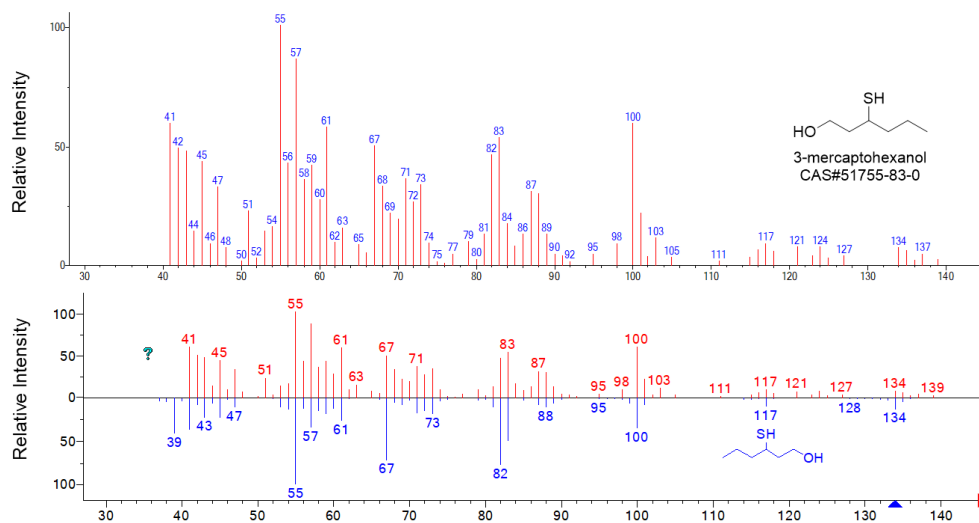

**Figure S62.** Comparison of mass spectra of 3-mercaptohexanol in Gorilla Glue (top) and the NIST Spectral Library v17 (2017) (bottom).

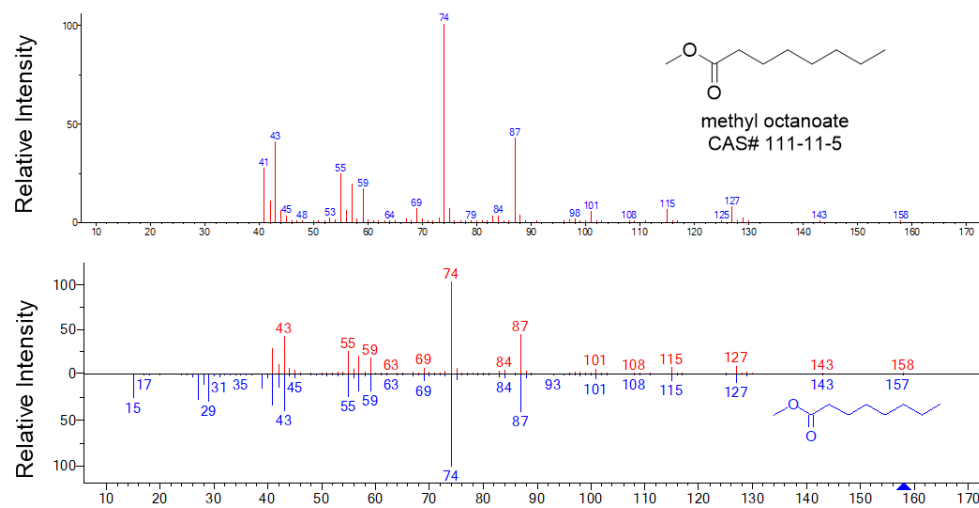

**Figure S63.** Comparison of mass spectra of methyl octanoate in Banana Scream (top) and the NIST Spectral Library v17 (2017) (bottom).

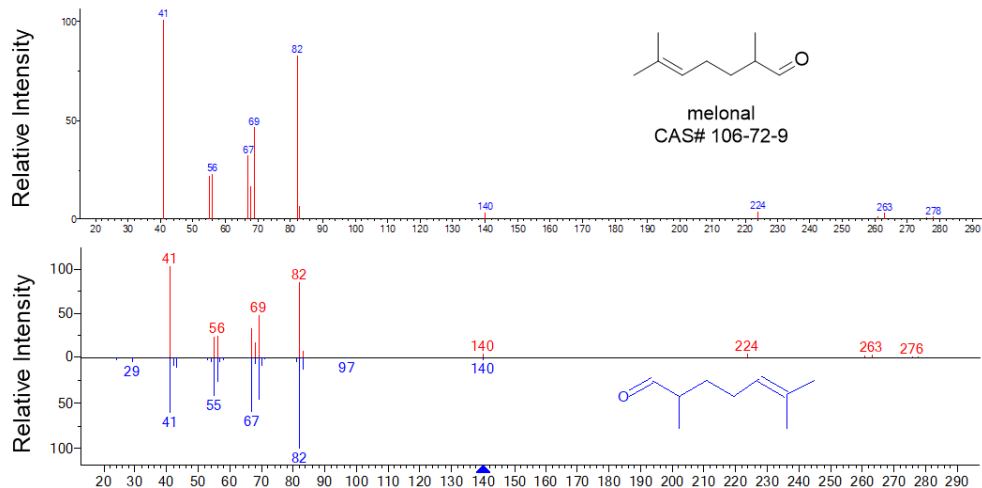

**Figure S64.** Comparison of mass spectra of melonal in Purple Churro (top) and the NIST Spectral Library v17 (2017) (bottom).

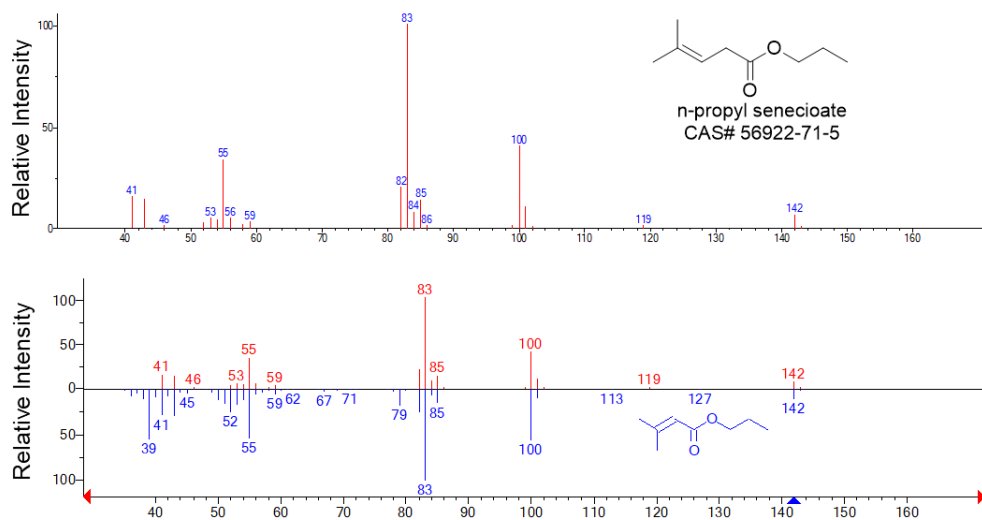

**Figure S65.** Comparison of mass spectra of *n*-propyl senecioate in Juiceman (top) and the NIST Spectral Library v17 (2017) (bottom).

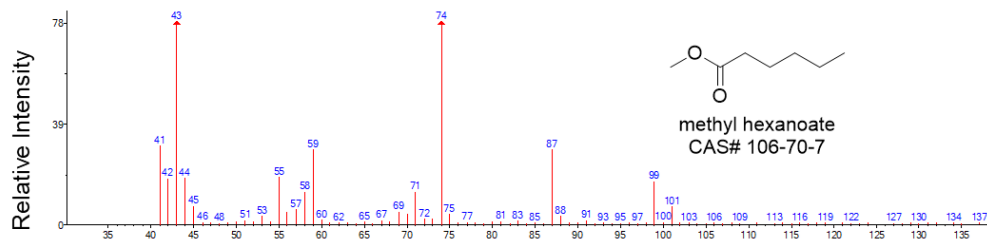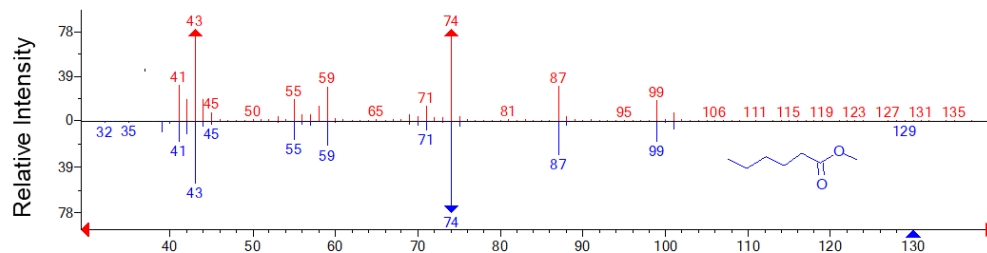

**Figure S66.** Comparison of mass spectra of methyl hexanoate in Starburst 36 #1 (top) and the NIST Spectral Library v17 (2017) (bottom).

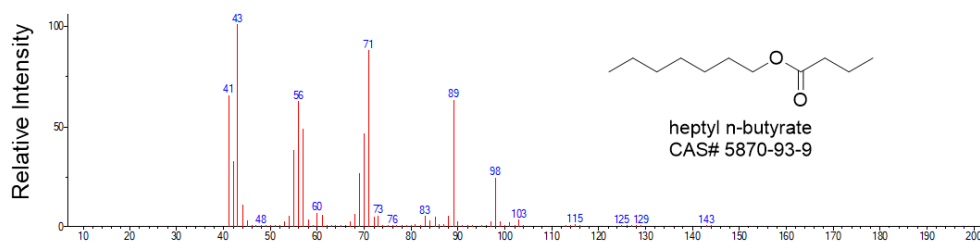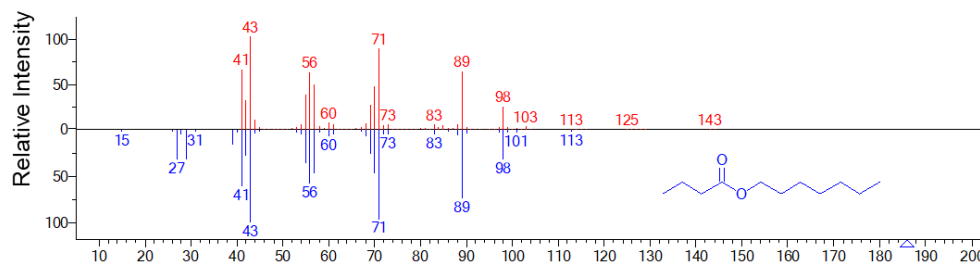

**Figure S67.** Comparison of mass spectra of heptyl *n*-butyrate in Gorilla Glue (top) and the NIST Spectral Library v17 (2017) (bottom).

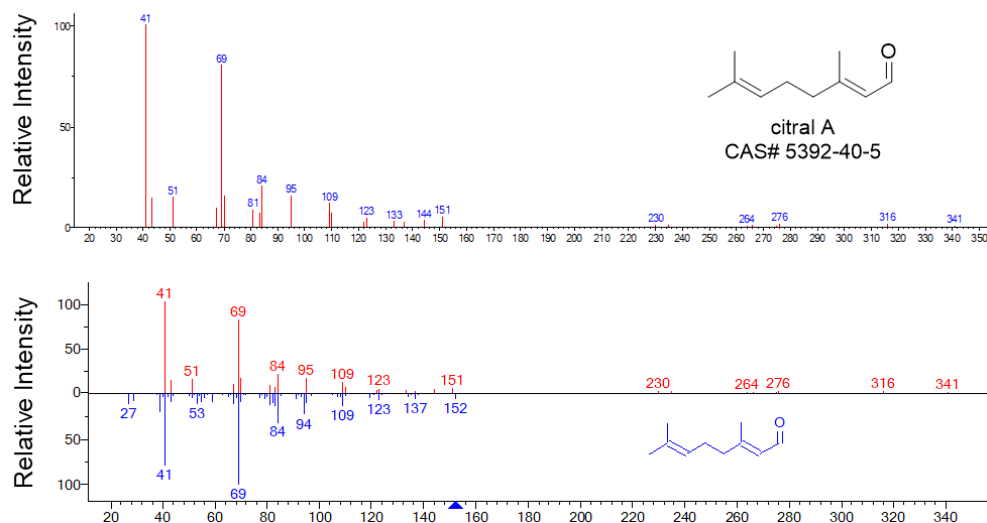

**Figure S68.** Comparison of mass spectra of citral A in Cookies n' Cream (top) and the NIST Spectral Library v17 (2017) (bottom).

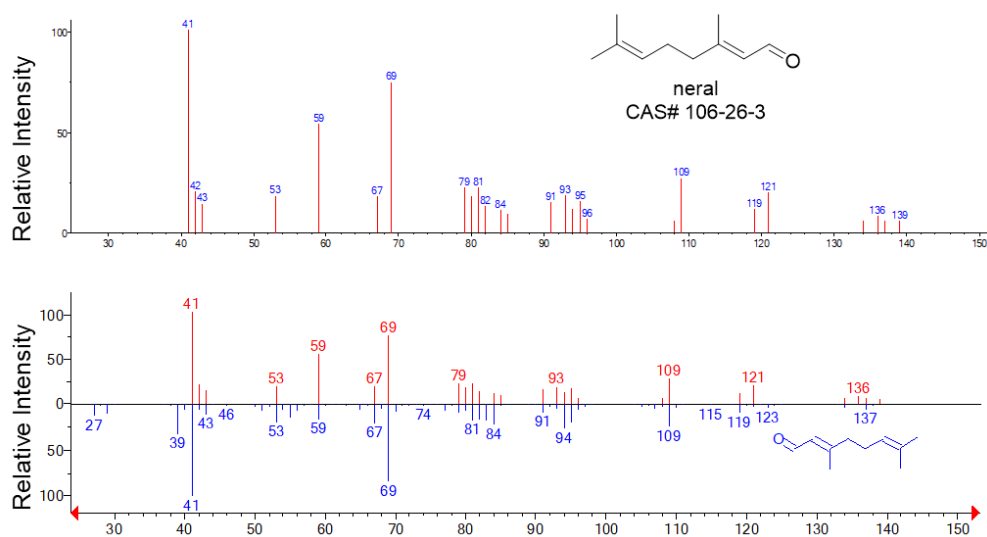

**Figure S69.** Comparison of mass spectra of neral (citral B) in Cookies n' Cream (top) and the NIST Spectral Library v17 (2017) (bottom).

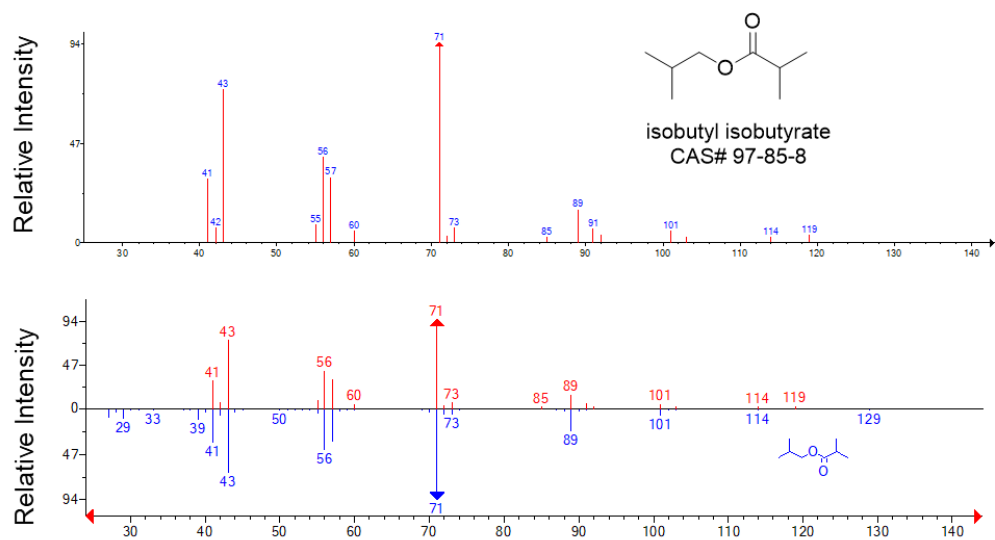

**Figure S70.** Comparison of mass spectra of heptyl *n*-butyrate in Gorilla Glue (top) and the NIST Spectral Library v17 (2017) (bottom).

## Chemical synthesis of senecioates.

### *propan-2-yl 3-methylbut-2-enoate (isopropyl senecioate)*

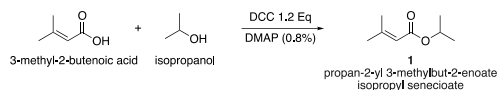

Figure S71. Scheme 1 Synthetic pathway to **1**.

This procedure was carried out open to air. In a 500 mL oven dried round bottom flask (RBF) equipped with a stir bar, 3-methyl-2-butenic acid (28.87g, 100 mmol, 1 equiv.) was dissolved in 100 mL dichloromethane (DCM) at room temperature. 4-Dimethylaminopyridine (DMAP) (1.01 g, 8.5 mmols, 0.085 equiv.) was added with isopropanol (31.0 mL, 400 mmols, 4 equiv.). The RBF was placed into an ice bath for five minutes before adding, N, N'-Dicyclohexylcarbodiimide (DCC) (24.70 g, 120 mmols, 1.2 equiv) into the reaction flask. The reaction stirred in an ice bath for another five minutes. During this time, the reaction mixture changed color rapidly from orange to off-white as precipitate forms. The mixture is removed from of the ice bath and continued stirring for 24 hours. The reaction mixture was filtered using a Buchner funnel. Any remaining solids were suspended in DCM and added to the filter. If precipitate passed through the Büchner funnel it was run again until no precipitate was in the resulting solution. The supernatant was partially concentrated using rotary evaporator. The organic solution was transferred to a separation flask and washed twice with aqueous 0.5 N HCl and twice with saturated sodium bicarbonate. Anhydrous magnesium sulfate was added to the organic layer in small increments while stirring. Once the anhydrous magnesium sulfate starts to clump, the solution was filtered. The crude material was analyzed by TLC, using several different non-polar systems. The TLC plate was eluted using 90:10, Hexane: Diethyl Ether, in a glass chamber. Column chromatography was carried out to purify the crude product. Silica gel was used as the stationary phase and packed with 90:10 Hexane: Diethyl Ether. Normal phase TLC was used again to identify product in the collection test tubes having a R<sub>f</sub> value of 0.75. The appropriate samples were concentrated using the roto evaporator and isopropyl senecioate was analyzed using in-house gas chromatography-FID with an internal standard (isoamyl butyrate) to test for purity. The sample was analyzed by mixing 5uL of the internal standard and 5uL of compound **1** in 1 mL with hexanes (yield = 50-55%). <sup>1</sup>H NMR (400 MHz, DMSO-*d*<sub>6</sub>): δ 11.29 (s, 1H), 7.24 (d, 1H, *J* = 8.7 Hz), 7.13 (s, 1H), 7.05 (1H, s), 6.71 (d, 1H, *J* = 8.7 Hz), 3.75 (s, 3H), 3.45–3.36 (m, 2H), 3.25–3.16 (m, 2H), 3.12 (s, 6H); <sup>13</sup>C NMR (101 MHz, DMSO-*d*<sub>6</sub>): δ 153.0, 131.5, 127.4, 123.6, 112.1, 111.1, 109.9, 100.2, 69.9, 58.5, 55.4, 19.1.

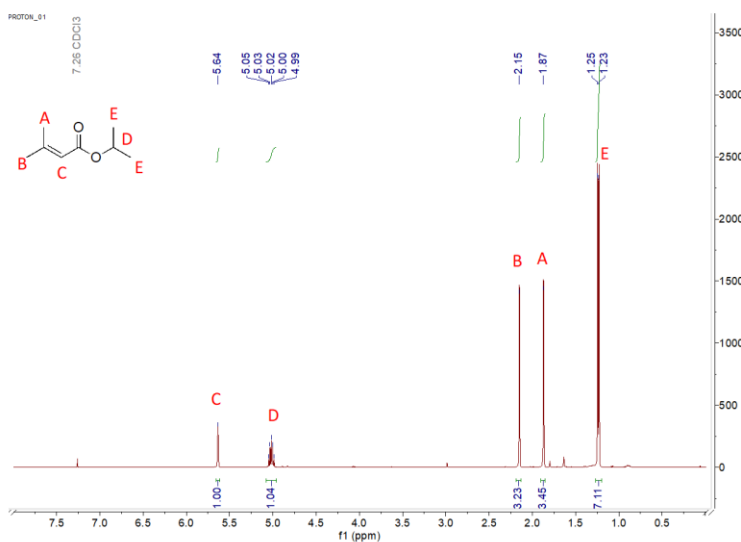

Figure S72. H1 NMR spectrum of **1**.

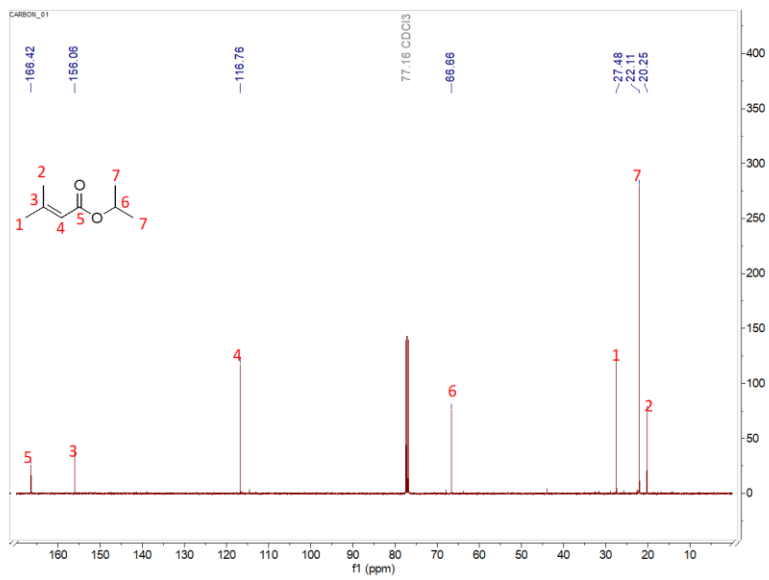

**Figure S73.** carbon NMR spectrum of 1.



*propyl 3-methylbut-2-enoate (propyl senecioate)*

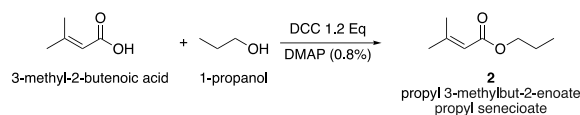

**Figure S74.** Synthetic pathway to **2**.

This procedure was carried out open to air. In a 500 mL oven dried round bottom flask (RBF) equipped with a stir bar, 3-methyl-2-butenic acid (28.9g, 100 mmol, 1 equiv.) was dissolved in 100 mL dichloromethane (DCM) at room temperature. 4-Dimethylaminopyridine (DMAP) (1.1 g, 8.5 mmols, 0.085 equiv.) was added with 1-propanol (32.0 mL, 400 mmols, 4 equiv.). The RBF was placed into an ice bath for five minutes before adding, N,N'-Dicyclohexylcarbodiimide (DCC) (24.9 g, 120 mmols, 1.2 equiv) into the reaction flask. The reaction stirred in an ice bath for another five minutes. During this time, the reaction mixture changed color rapidly from orange to off-white as precipitate forms. The mixture is removed from of the ice bath and continued stirring for 24 hours. The reaction mixture was filtered using a Buchner funnel. Any remaining solids were suspended in DCM and added to the filter. If precipitate passed through the Büchner funnel it was run again until no precipitate was in the resulting solution. The supernatant was partially concentrated using rotary evaporator. The organic solution was transferred to a separation flask and washed twice with aqueous 0.5 N HCl and twice with saturated sodium bicarbonate. Anhydrous magnesium sulfate was added to the organic layer in small increments while stirring. Once the anhydrous magnesium sulfate starts to clump, the solution was filtered. The crude material was analyzed by TLC, using several different non-polar systems. The TLC plate was eluted using 90:10, Hexane: Diethyl Ether, in a glass chamber. Column chromatography was carried out to purify the crude product. Silica gel was used as the stationary phase and packed with 90:10 Hexane: Diethyl Ether. Normal phase TLC was used again to identify product in the collection test tubes having a R<sub>f</sub> value of 0.75. The appropriate samples were concentrated using the roto evaporator and propyl senecioate was analyzed using in-house gas chromatography-FID with an internal standard (isoamyl butyrate) to test for purity (Yield = 55%). <sup>1</sup>H NMR (400MHz, Chloroform-d): A= 2.16ppm, s, 3H, B= 1.88ppm, s, 3H; C=5.68ppm, s, 1H; D=4.1-4.0ppm, s, 2H; E=1.69-1.60ppm, q, 2H; F=0.97-0.93, t, 2H. <sup>13</sup>C NMR (400MHz, Chloroform-d): 1=20.29ppm, s, 1C; 2=27.50ppm, s, 1C; 3=156.43ppm, s, 1C; 4=116.28ppm, s, 1C; 5=167.00ppm, s, 1C; 6=65.30ppm, s, 1C; 7=22.23ppm, s, 1C.

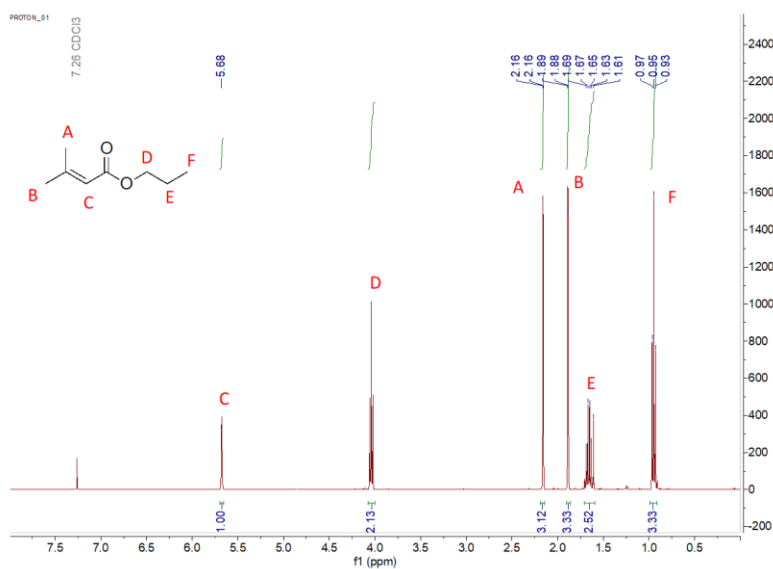

**Figure S75.** H1 NMR spectrum of **2**.

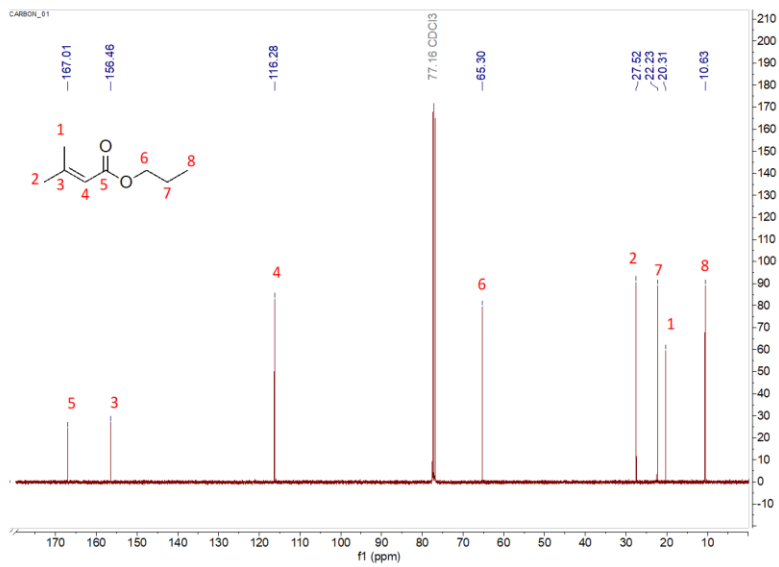

**Figure S76.** Carbon NMR spectrum of 2.

*butyl 3-methylbut-2-enoate (butyl senecioate)*

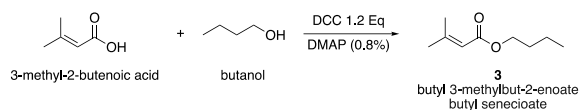

**Figure S77.** Synthetic pathway to **3**.

This procedure was carried out open to air. In a 500 mL oven dried round bottom flask (RBF) equipped with a stir bar, 3-methyl-2-butenic acid (27.8g, 100 mmol, 1 equiv.) was dissolved in 100 mL dichloromethane (DCM) at room temperature. 4-Dimethylaminopyridine (DMAP) (1.0 g, 8.5 mmols, 0.085 equiv.) was added with butanol (32.0 mL, 400 mmols, 4 equiv.). The RBF was placed into an ice bath for five minutes before adding, N,N'-Dicyclohexylcarbodiimide (DCC) (24.8 g, 120 mmols, 1.2 equiv) into the reaction flask. The reaction stirred in an ice bath for another five minutes. During this time, the reaction mixture changed color rapidly from orange to off-white as precipitate forms. The mixture is removed from of the ice bath and continued stirring for 24 hours. The reaction mixture was filtered using a Buchner funnel. Any remaining solids were suspended in DCM and added to the filter. If precipitate passed through the Büchner funnel it was run again until no precipitate was in the resulting solution. The supernatant was partially concentrated using rotary evaporator. The organic solution was transferred to a separation flask and washed twice with aqueous 0.5 N HCl and twice with saturated sodium bicarbonate. Anhydrous magnesium sulfate was added to the organic layer in small increments while stirring. Once the anhydrous magnesium sulfate starts to clump, the solution was filtered. The crude material was analyzed by TLC, using several different non-polar systems. The TLC plate was eluted using 90:10, Hexane: Diethyl Ether, in a glass chamber. Column chromatography was carried out to purify the crude product. Silica gel was used as the stationary phase and packed with 90:10 Hexane: Diethyl Ether. Normal phase TLC was used again to identify product in the collection test tubes having a R<sub>f</sub> value of 0.45. The appropriate samples were concentrated using the roto evaporator and butyl senecioate was analyzed using in-house gas chromatography-FID with an internal standard (isoamyl butyrate) to test for purity (Yield = 55%). <sup>1</sup>H NMR (400MHz, Chloroform-d): A= 2.15ppm, s, 3H, B= 1.88ppm, s, 3H; C=5.67ppm, s, 1H; D=4.09-4.06ppm, s, 2H; E=1.64-1.60ppm, q, 2H; F=1.58-1.34ppm, q, 2H; G=0.94-.91ppm, t, 3H; <sup>13</sup>C NMR (400MHz, Chloroform-d): 1=20.31ppm, s,1C; 2=27.52ppm, s,1C; 3=156.46ppm, s,1C; 4=116.28ppm, s, 1C; 5=167.00ppm, s, 1C; 6=65.53ppm, s, 1C; 7=30.93ppm, s, 1C; 8=19.36, s, 1C; 9=13.87ppm, s,1C.

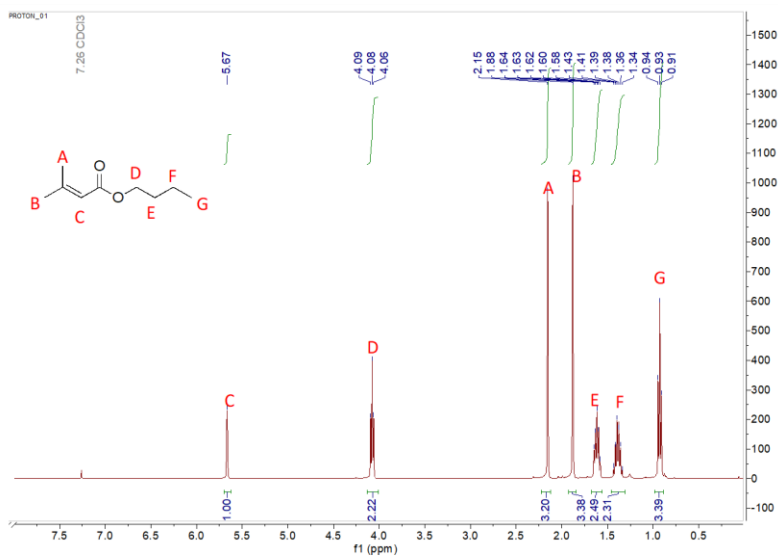

**Figure S78.** H1 NMR spectrum of **3**.

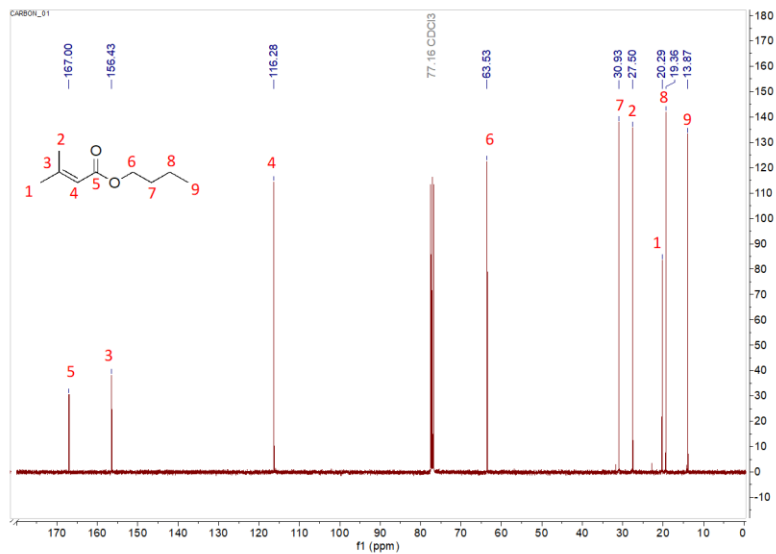

**Figure S79.** Carbon NMR spectrum of 3.

*isopentyl 3-methylbut-2-enoate (isoamyl senecioate)*

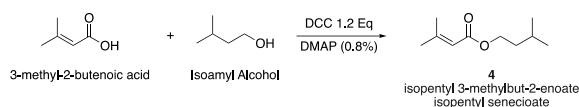

**Figure S80.** Synthetic pathway to **4**.

This procedure was carried out open to air. In a 500 mL oven dried round bottom flask (RBF) equipped with a stir bar, 3-methyl-2-butenic acid (27.9g, 100 mmol, 1 equiv.) was dissolved in 100 mL dichloromethane (DCM) at room temperature. 4-Dimethylaminopyridine (DMAP) (1.1 g, 8.5 mmols, 0.085 equiv.) was added with butanol (32.0 mL, 400 mmols, 4 equiv.). The RBF was placed into an ice bath for five minutes before adding, N, N'-Dicyclohexylcarbodiimide (DCC) (25.5 g, 120 mmols, 1.2 equiv) into the reaction flask. The reaction stirred in an ice bath for another five minutes. During this time, the reaction mixture changed color rapidly from orange to off-white as precipitate forms. The mixture is removed from of the ice bath and continued stirring for 24 hours. The reaction mixture was filtered using a Buchner funnel. Any remaining solids were suspended in DCM and added to the filter. If precipitate passed through the Büchner funnel it was run again until no precipitate was in the resulting solution. The supernatant was partially concentrated using rotary evaporator. The organic solution was transferred to a separation flask and washed twice with aqueous 0.5 N HCl and twice with saturated sodium bicarbonate. Anhydrous magnesium sulfate was added to the organic layer in small increments while stirring. Once the anhydrous magnesium sulfate starts to clump, the solution was filtered. The crude material was analyzed by TLC, using several different non-polar systems. The TLC plate was eluted using 90:10, Hexane: Diethyl Ether, in a glass chamber. Column chromatography was carried out to purify the crude product. Silica gel was used as the stationary phase and packed with 90:10 Hexane: Diethyl Ether. Normal phase TLC was used again to identify product in the collection test tubes having a R<sub>f</sub> value of 0.75. The appropriate samples were concentrated using the roto evaporator and isoamyl senecioate was analyzed using in-house gas chromatography-FID with an internal standard (isoamyl butyrate) to test for purity (Yield = 65%). <sup>1</sup>H NMR (400MHz, Chloroform-d) A= 2.15ppm, s, 3H, B= 1.88ppm, s, 3H; C=5.67ppm, s, 1H; D=4.09-4.06ppm, s, 2H; E=1.64-1.60ppm, q, 2H; F=1.88-1.68ppm, q, 1H; G=0.92-.91ppm, d, 3H. <sup>13</sup>C NMR (400MHz, Chloroform-d) See **Figure 38**, for exact numbering: 1=20.29ppm, s,1C; 2=27.52ppm, s,1C; 3=156.47ppm, s,1C; 4=116.28ppm, s, 1C; 5=167.00ppm, s, 1C; 6=62.31ppm, s, 1C; 7=37.60ppm, s, 1C; 8=25.25, s, 2C; 9=22.62ppm, s,1C.

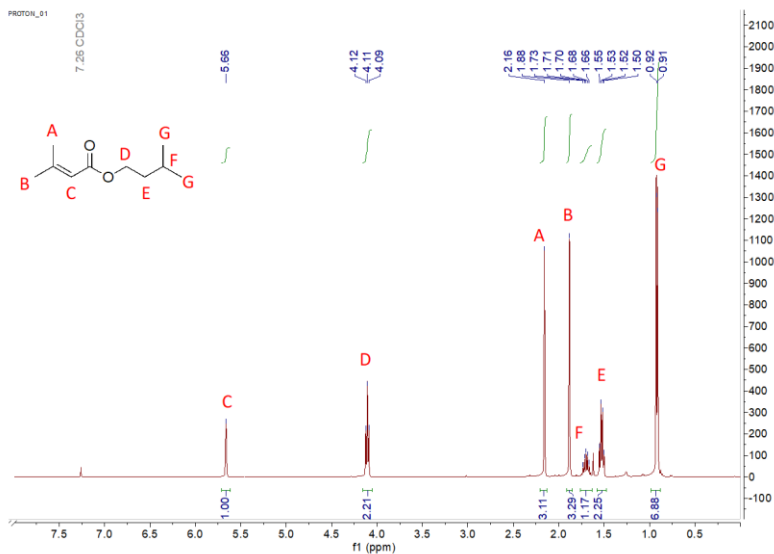

**Figure S81.** H1 NMR spectrum of **4**.

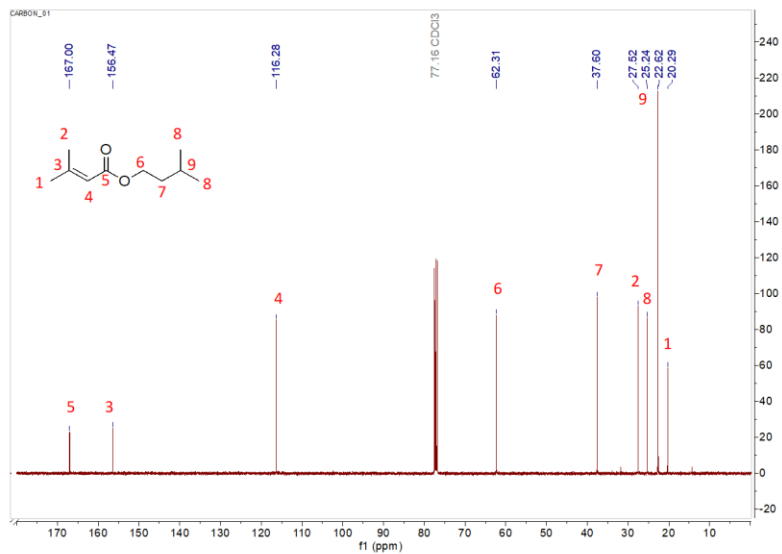

**Figure S82.** Carbon NMR spectrum of 4.

*hexyl 3-methylbut-2-enoate (hexyl senecioate)*

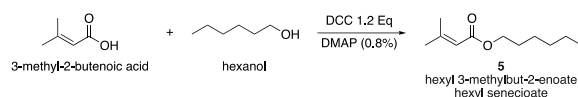

**Figure S83.** Synthetic pathway to **5**.

This procedure was carried out open to air. In a 500 mL oven dried round bottom flask (RBF) equipped with a stir bar, 3-methyl-2-butenoic acid (27.9g, 100 mmol, 1 equiv.) was dissolved in 100 mL dichloromethane (DCM) at room temperature. 4-Dimethylaminopyridine (DMAP) (1.1 g, 8.5 mmols, 0.085 equiv.) was added with butanol (32.0 mL, 400 mmols, 4 equiv.). The RBF was placed into an ice bath for five minutes before adding, N, N'-Dicyclohexylcarbodiimide (DCC) (25.5 g, 120 mmols, 1.2 equiv) into the reaction flask. The reaction stirred in an ice bath for another five minutes. During this time, the reaction mixture changed color rapidly from orange to off-white as precipitate forms. The mixture is removed from of the ice bath and continued stirring for 24 hours. The reaction mixture was filtered using a Buchner funnel. Any remaining solids were suspended in DCM and added to the filter. If precipitate passed through the Büchner funnel it was run again until no precipitate was in the resulting solution. The supernatant was partially concentrated using rotary evaporator. The organic solution was transferred to a separation flask and washed twice with aqueous 0.5 N HCl and twice with saturated sodium bicarbonate. Anhydrous magnesium sulfate was added to the organic layer in small increments while stirring. Once the anhydrous magnesium sulfate starts to clump, the solution was filtered. The crude material was analyzed by TLC, using several different non-polar systems. The TLC plate was eluted using 90:10, Hexane: Diethyl Ether, in a glass chamber. Column chromatography was carried out to purify the crude product. Silica gel was used as the stationary phase and packed with 90:10 Hexane: Diethyl Ether. Normal phase TLC was used again to identify product in the collection test tubes having a R<sub>f</sub> value of 0.62. The appropriate samples were concentrated using the roto evaporator and hexyl senecioate was analyzed using in-house gas chromatography-FID with an internal standard (isoamyl butyrate) to test for purity (yield = 75%). <sup>1</sup>H NMR (400MHz, Chloroform-d): A= 2.16ppm, s, 3H, B= 1.88ppm, s, 3H; C=5.67ppm, s, 1H; D=4.09-4.05ppm, s, 2H; E=1.65-1.59ppm, q, 2H; F=1.30ppm, t, 2H; G=1.301ppm, t, 2H; H=1.30ppm, t,2H; I=0.88ppm, s, 3H; <sup>13</sup>C NMR (400MHz, Chloroform-d): 1=20.29ppm, s,1C; 2=27.52ppm, s,1C; 3=156.46ppm, s,1C; 4=116.30ppm, s, 1C; 5=167.02ppm, s, 1C; 6=63.86ppm, s, 1C; 7=37.60ppm, s, 1C; 8=27.53ppm, s, 2C; 9=31.62ppm, s,1C; 10=20.31ppm, s, 1C, 11=14.15ppm, s, 1C.

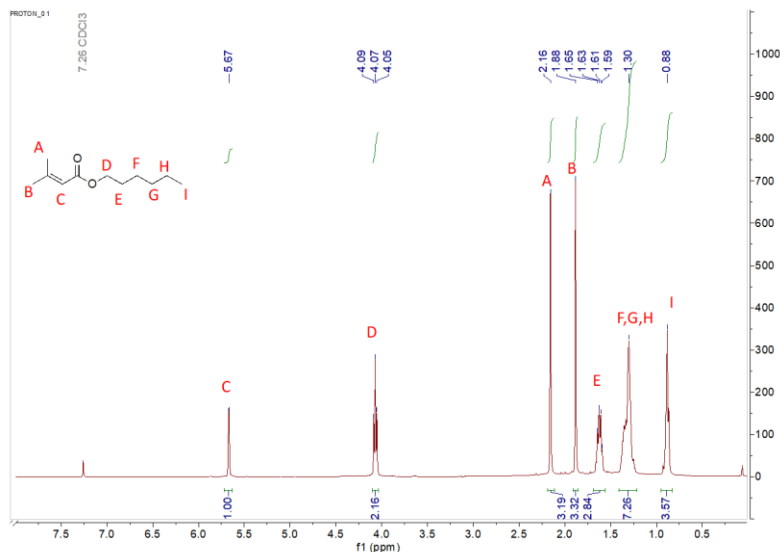

**Figure S84.** H1 NMR spectrum of **5**.

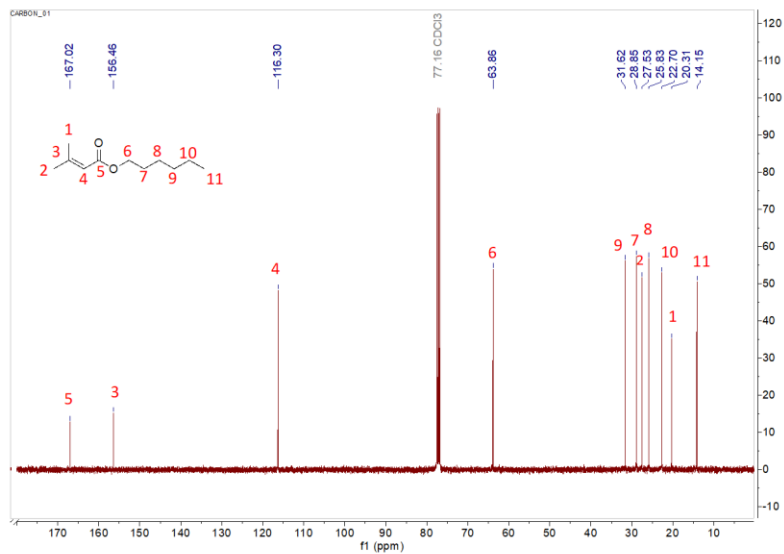

**Figure S85.** Carbon NMR spectrum of 5.
